# Supplementary material for: Clinical Presentation, Investigation Findings, and Treatment Outcomes of Spontaneous Intracranial Hypotension Syndrome: A Systematic Review and Meta-analysis
Source: PubMed Central journal article supplement (PMC7783594; doi:10.1001/jamaneurol.2020.4799), 2021-01-04
Supplement: jamaneurol-e204799-s001.pdf [file jamaneurol-e204799-s001.pdf]

## Supplemental Online Content

D'Antona L, Jaime Merchan MA, Vassiliou A, et al. Clinical presentation, investigation findings, and treatment outcomes of spontaneous intracranial hypotension syndrome: a systematic review and meta-analysis. *JAMA Neurol.* Published online January 4, 2021. doi:10.1001/jamaneurol.2020.4799

- eTable 1.** Variables included in the systematic review
- eTable 2.** Inclusion criteria for meta-analyses
- eTable 3.** List of selected studies and inclusion for meta-analyses
- eFigure 1.** Flowchart of the selection process for articles
- eFigure 2.** Age meta-analysis (mean years)
- eFigure 3.** Sex meta-analysis (proportion of female patients)
- eFigure 4.** Symptoms duration meta-analysis (mean days)
- eFigure 5.** Meta-analysis of proportions of patients with and without headache
- eFigure 6.** Meta-analysis of proportions of patients with and without orthostatic headache
- eFigure 7.** Meta-analysis of proportions of headache location
- eFigure 8.** Meta-analyses of proportions of signs and symptoms
- eFigure 9.** Meta-analyses of proportions of brain MRI findings
- eFigure 10.** Meta-analysis of proportions of positive findings in spinal MRI
- eFigure 11.** Meta-analysis of proportions of positive findings in CT myelography (CTM)
- eFigure 12.** Meta-analysis of proportions of positive findings in MR myelography
- eFigure 13.** Meta-analysis of proportions of positive findings in MR myelography with intrathecal gadolinium
- eFigure 14.** Meta-analysis of proportions of positive findings in radionuclide cisternography
- eFigure 15.** Meta-analysis of proportions of positive findings in digital subtraction myelography
- eFigure 16.** Meta-analysis of proportions of positive findings in digital subtraction myelography performed in lateral decubitus position
- eFigure 17.** Meta-analysis of proportions of leak location
- eFigure 18.** Meta-analysis of proportions of lumbar puncture opening pressure
- eFigure 19.** Meta-analysis of proportions of successful and unsuccessful conservative treatment
- eFigure 20.** Meta-analysis of proportions of successful EBP
- eFigure 21.** Epidural Blood Patches (EBPs) outcomes. Pooled estimates of proportions (95% CI) of successful EBP treatment stratified by EBP technique (non-targeted/targeted, small/large)
- eReferences**

This supplemental material has been provided by the authors to give readers additional information about their work.

**eTable 1. Variables included in the systematic review**

| <b>Domain</b>                                                                | <b>Variables</b>                                                                                                                                                                                                                                                                                                                                                       |
|------------------------------------------------------------------------------|------------------------------------------------------------------------------------------------------------------------------------------------------------------------------------------------------------------------------------------------------------------------------------------------------------------------------------------------------------------------|
| Study characteristics                                                        | Authors, affiliations, SIH diagnostic criteria, study design (prospective/retrospective, observational/interventional), number of patients.                                                                                                                                                                                                                            |
| Demographics                                                                 | Age (mean, SD, range), sex (male/female).                                                                                                                                                                                                                                                                                                                              |
| Risk factors                                                                 | Patients with connective tissue disorders, spinal pathologies, other risk factors.                                                                                                                                                                                                                                                                                     |
| Clinical presentation                                                        | Symptoms duration (mean, SD, range), headache (n. patients and characteristics), nausea/vomiting, neck pain/stiffness, hearing impairment, tinnitus, other ear signs/symptoms, dizziness, vertigo, photophobia, diplopia, other visual signs/symptoms, reduced level of consciousness, cognitive disturbances, back pain, movement disturbances, other signs/symptoms. |
| Brain MRI                                                                    | N. of investigations performed, diffuse pachymeningeal enhancement, subdural collections, brain sagging, pituitary gland enlargement, venous engorgement, slit ventricles, tonsillar descent, normal brain MRI appearances, other findings.                                                                                                                            |
| Spinal imaging                                                               | For each type of spinal investigation: n. of investigations performed, n. of extradural CSF detection, type of leak detection (specific leak site, broad area, unspecified). Type of investigations: spine MRI, CT myelogram, radionuclide cisternography, MR myelography (with and without intrathecal gadolinium), other spinal investigations.                      |
| CSF leak location                                                            | N. of leaks identified, leaks location (cervical, cervico-thoracic, thoracic, thoraco-lumbar, lumbar, lumbo-sacral, sacral, multiple leaks).                                                                                                                                                                                                                           |
| CSF pressure                                                                 | N. of lumbar punctures (or CSF pressure measurements), pressure findings: low (<60 mmH <sub>2</sub> O), normal (60-200 mmH <sub>2</sub> O), high (>200 mmH <sub>2</sub> O).                                                                                                                                                                                            |
| Treatments and outcomes                                                      | Conservative treatment: n. of patients treated, duration of treatment, outcomes, type (bed rest, hydration, caffeine, analgesia, steroids);<br>EBP: n. of patients treated, duration of treatment, outcomes, n. of EBPs, type (targeted, nontargeted, large(>20ml), small);<br>Other treatments.                                                                       |
| CSF: Cerebrospinal Fluid; EBP: Epidural Blood Patch; SD: Standard Deviation. |                                                                                                                                                                                                                                                                                                                                                                        |

**eTable 2. Inclusion criteria for meta-analyses**

| <b>Metanalyses</b>                                                           | <b>Inclusion criteria for metanalyses</b>                                                                                                                                                                                              |
|------------------------------------------------------------------------------|----------------------------------------------------------------------------------------------------------------------------------------------------------------------------------------------------------------------------------------|
| Age                                                                          | Mean age and SD specified.                                                                                                                                                                                                             |
| Sex                                                                          | N. of males/females specified.                                                                                                                                                                                                         |
| Symptoms duration                                                            | Mean duration and SD specified.                                                                                                                                                                                                        |
| Sign/Symptoms                                                                | For each sign/symptom: n. of patients with the sign/symptom specified.                                                                                                                                                                 |
| Brain MRI                                                                    | N. of investigations, type of positive findings and proportion of positive findings specified.                                                                                                                                         |
| Spinal imaging                                                               | N. of investigations, type of investigations and proportion of positive findings (extradural CSF) specified.                                                                                                                           |
| CSF pressure                                                                 | N. of investigations and findings (n. low pressure, normal pressure and high pressure) specified. Studies in which all patients had low CSF opening pressure were excluded.                                                            |
| Outcomes of conservative treatment                                           | N. of patients who received treatment and n. good outcomes specified. Studies in which all (or none) of the patients had good outcomes were excluded.                                                                                  |
| Outcomes of first EBP                                                        | N. of patients who received treatment and n. good outcomes after 1 <sup>st</sup> EBP specified. Studies in which all (or none) of the patients had good outcomes were excluded.                                                        |
| Outcomes of nontargeted/targeted EBP                                         | N. of patients who received treatment, type of EBP (nontargeted or targeted) and n. good outcomes after 1 <sup>st</sup> EBP specified. Studies in which all (or none) of the patients had good outcomes were excluded.                 |
| Outcomes of small/large EBP                                                  | N. of patients who received treatment, type of EBP (small or large) and n. good outcomes after 1 <sup>st</sup> EBP specified. Studies in which all (or none) of the patients had good outcomes were excluded.                          |
| All                                                                          | Studies with 0% or 100% proportion of findings were excluded.<br>For each meta-analysis, if more than one study from the same author met the inclusion criteria, only the study reporting the largest number of patients was included. |
| CSF: Cerebrospinal Fluid; EBP: Epidural Blood Patch; SD: Standard Deviation. |                                                                                                                                                                                                                                        |

**eTable 3. List of selected studies and inclusion for meta-analyses**

| Reference | Author (year)               | Quality grading <sup>a</sup> | Patients (n) | Meta-analyses                                                                                                 |
|-----------|-----------------------------|------------------------------|--------------|---------------------------------------------------------------------------------------------------------------|
| (1)       | Cebeci et al (2020)         | Fair                         | 20           | Age, sex, other symptoms, MRMG, leak location                                                                 |
| (2)       | Davies et al (2020)         | Good                         | 86           | Sex, other symptoms, conservative treatment                                                                   |
| (3)       | Wang et al (2020)           | Good                         | 20           |                                                                                                               |
| (4)       | Dobrocky et al (2019)       | Good                         | 56           | Age, sex, brain MRI                                                                                           |
| (5)       | Li et al (2019)             | Fair                         | 40           | Age, sex, clinical presentation, brain MRI, LPOP                                                              |
| (6)       | Levi et al (2019)           | Good                         | 101          | Age, sex, headache, other symptoms, nontargeted EBP, small EBP                                                |
| (7)       | Kim et al (2019)            | Good                         | 43           | Age, sex, symptoms duration, headache, other symptoms, brain MRI                                              |
| (8)       | Schievink et al (2019)      | Good                         | 113          | Age, symptoms duration, headache                                                                              |
| (9)       | Schievink et al (2019)      | Good                         | 49           | DSM                                                                                                           |
| (10)      | Pagani-Estévez et al (2019) | Fair                         | 202          | First EBP                                                                                                     |
| (11)      | Fichtner et al (2019)       | Fair                         | 27           | LPOP, leak location                                                                                           |
| (12)      | Martin et al (2019)         | Fair                         | 94           | Other symptoms, first EBP                                                                                     |
| (13)      | Kinsman et al (2019)        | Fair                         | 144          | Sex                                                                                                           |
| (14)      | Farb et al (2019)           | Fair                         | 31           | Sex, brain MRI, spine MRI, DSM, leak location                                                                 |
| (15)      | Griffin et al (2019)        | Good                         | 92           |                                                                                                               |
| (16)      | Ohtonary et al (2018)       | Fair                         | 19           | Age, sex, headache, other symptoms, LPOP, leak location, conservative,                                        |
| (17)      | Murakami et al (2018)       | Good                         | 38           | Age, sex                                                                                                      |
| (18)      | Lee et al (2018)            | Fair                         | 62           | Age, sex, leak location, first EBP, targeted EBP                                                              |
| (19)      | Schievink et al (2018)      | Good                         | 29           | Conservative treatment                                                                                        |
| (20)      | Xia et al (2018)            | Good                         | 156          | Conservative treatment                                                                                        |
| (21)      | Ahn et al (2018)            | Good                         | 116          | Sex, brain MRI, spine MRI, CTM, leak location, first EBP, nontargeted EBP, targeted EBP                       |
| (22)      | Yagi et al (2018)           | Fair                         | 37           | Sex, symptoms duration, other symptoms, brain MRI, leak location, conservative, first EBP, large EBP          |
| (23)      | Tsai et al (2018)           | Fair                         | 27           | Symptoms duration, brain MRI                                                                                  |
| (24)      | Takai et al (2018)          | Fair                         | 11           | Symptoms duration, LPOP                                                                                       |
| (25)      | Dobrocky et al (2018)       | Fair                         | 14           |                                                                                                               |
| (26)      | Clark et al (2018)          | Fair                         | 101          |                                                                                                               |
| (27)      | Ferrante et al (2018)       | Fair                         | 35           |                                                                                                               |
| (28)      | Beck et al (2018)           | Fair                         | 47           |                                                                                                               |
| (29)      | Schievink et al (2018)      | Fair                         | 15           |                                                                                                               |
| (30)      | Yao et al (2017)            | Fair                         | 206          | Age, sex, symptoms duration, headache, brain MRI, LPOP                                                        |
| (31)      | Wu et al (2017)             | Good                         | 150          | Age, sex, symptoms duration, headache, other symptoms, brain MRI, MRM, leak location, first EBP, targeted EBP |
| (32)      | Beck et al (2017)           | Good                         | 31           | Other symptoms                                                                                                |
| (33)      | He et al (2017)             | Good                         | 165          | Other symptoms, CTM, MRM, leak location, conservative, first EBP, targeted EBP, small EBP                     |
| (34)      | Choi et al (2017)           | Good                         | 95           | Sex, headache, other symptoms, brain MRI, leak location, first EBP, nontargeted EBP, targeted EBP, small EBP  |
| (35)      | Kim et al (2017)            | Fair                         | 128          | Sex, headache, headache location, other symptoms, brain MRI, first EBP                                        |
| (36)      | Kranz et al (2017)          | Good                         | 22           |                                                                                                               |
| (37)      | Chen et al (2017)           | Good                         | 19           |                                                                                                               |
| (38)      | Chen et al (2017)           | Good                         | 23           |                                                                                                               |
| (39)      | Chen et al (2016)           | Fair                         | 45           | Age, sex, headache, other symptoms, conservative, first EBP                                                   |
| (40)      | So et al (2016)             | Fair                         | 34           | Age, sex, symptoms duration, headache, leak location, first EBP, small EBP                                    |
| (41)      | Amemiya et al (2016)        | Good                         | 15           | Age, symptoms duration, other symptoms                                                                        |
| (42)      | Kranz et al (2016)          | Good                         | 99           | CTM                                                                                                           |
| (43)      | Schievink et al (2016)      | Good                         | 53           | DSM                                                                                                           |
| (44)      | Ferrante et al (2016)       | Fair                         | 106          | First EBP, large EBP                                                                                          |

| Reference | Author (year)          | Quality grading <sup>a</sup> | Patients (n) | Meta-analyses                                                                                                             |
|-----------|------------------------|------------------------------|--------------|---------------------------------------------------------------------------------------------------------------------------|
| (45)      | Amrhein et al (2016)   | Fair                         | 35           | First EBP, targeted EBP, small EBP                                                                                        |
| (46)      | Fichtner et al (2016)  | Good                         | 39           | Headache                                                                                                                  |
| (47)      | Monteith et al (2016)  | Fair                         | 12           | Headache, brain MRI, RIC                                                                                                  |
| (48)      | Schievink et al (2016) | Good                         | 568          | Sex                                                                                                                       |
| (49)      | Hori et al (2016)      | Good                         | 22           | Sex, brain MRI                                                                                                            |
| (50)      | Karm et al (2016)      | Fair                         | 104          | Sex, brain MRI, first EBP, targeted EBP                                                                                   |
| (51)      | Ansel et al (2016)     | Fair                         | 16           | Sex, brain MRI, spine MRI, leak location, first EBP, nontargeted EBP, small EBP                                           |
| (52)      | Takahashi et al (2016) | Fair                         | 169          | Sex, headache, brain MRI, RIC, LPOP, leak location, conservative, first EBP                                               |
| (53)      | Capizzano et al (2016) | Fair                         | 41           | Sex, headache, other symptoms, brain MRI                                                                                  |
| (54)      | Tanaka et al (2016)    | Good                         | 40           | Sex, headache, other symptoms, brain MRI                                                                                  |
| (55)      | Kim et al (2016)       | Fair                         | 140          | Sex, headache, other symptoms, brain MRI, spine MRI, conservative, first EBP, small EBP                                   |
| (56)      | Choi et al (2016)      | Fair                         | 18           | Sex, leak location, first EBP, targeted EBP                                                                               |
| (57)      | Kranz et al (2016)     | Good                         | 89           | Symptoms duration                                                                                                         |
| (58)      | Ferrante et al (2016)  | Good                         | 28           | Symptoms duration, headache location                                                                                      |
| (59)      | Beck et al (2016)      | Good                         | 15           |                                                                                                                           |
| (60)      | Verdoorn et al (2016)  | Fair                         | 129          |                                                                                                                           |
| (61)      | Wan et al (2016)       | Fair                         | 15           |                                                                                                                           |
| (62)      | Kranz et al (2015)     | Good                         | 106          | Age, sex, brain MRI, LPOP                                                                                                 |
| (63)      | Idrissi et al (2015)   | Fair                         | 24           | Age, sex, headache, headache location, other symptoms, brain MRI, spine MRI, RIC, leak location, conservative, first EBP, |
| (64)      | Thielen et al (2015)   | Fair                         | 14           | Leak location                                                                                                             |
| (65)      | Joo et al (2015)       | Fair                         | 76           | Leak location, small EBP                                                                                                  |
| (66)      | Feltracco et al (2015) | Fair                         | 18           | Sex, brain MRI, first EBP, nontargeted EBP                                                                                |
| (67)      | Schievink et al (2015) | Fair                         | 13           |                                                                                                                           |
| (68)      | Schievink et al (2015) | Good                         | 42           |                                                                                                                           |
| (69)      | Xia et al (2015)       | Fair                         | 93           |                                                                                                                           |
| (70)      | Yoshida et al (2014)   | Fair                         | 12           | Age, sex, headache, other symptoms, brain MRI, leak location, first EBP, targeted EBP, small EBP                          |
| (71)      | Chazen et al (2014)    | Good                         | 24           | Sex, CTM, MRMG, LPOP                                                                                                      |
| (72)      | Pimienta et al (2014)  | Fair                         | 50           |                                                                                                                           |
| (73)      | Schievink et al (2014) | Fair                         | 338          |                                                                                                                           |
| (74)      | Tung et al (2014)      | Good                         | 17           |                                                                                                                           |
| (75)      | Hashizume et al (2013) | Fair                         | 29           | Age, sex, other symptoms, brain MRI, RIC, LPOP, conservative, first EBP, targeted EBP                                     |
| (76)      | Schievink et al (2013) | Fair                         | 24           | Headache location                                                                                                         |
| (77)      | Hosoya et al (2013)    | Fair                         | 100          | Spine MRI, MRM                                                                                                            |
| (78)      | Ferrante et al (2013)  | Fair                         | 10           |                                                                                                                           |
| (79)      | Franzini et al (2013)  | Fair                         | 80           |                                                                                                                           |
| (80)      | Kranz et al (2013)     | Good                         | 19           |                                                                                                                           |
| (81)      | Reinstein et al (2013) | Good                         | 50           |                                                                                                                           |
| (82)      | Albes et al (2012)     | Fair                         | 26           | Age, sex, CTM, leak location, first EBP, targeted EBP, large EBP                                                          |
| (83)      | Hasiloglu et al (2012) | Good                         | 25           | Age, sex, headache, LPOP, leak location                                                                                   |
| (84)      | Hashizume et al (2012) | Fair                         | 12           | Leak location                                                                                                             |
| (85)      | Akbar et al (2012)     | Fair                         | 41           | MRMG                                                                                                                      |
| (86)      | Luetmer et al (2012)   | Fair                         | 151          | Spine MRI                                                                                                                 |
| (87)      | Balkan et al (2012)    | Fair                         | 11           | Symptoms duration, other symptoms, brain MRI, first EBP, targeted EBP                                                     |
| (88)      | Schievink et al (2012) | Good                         | 33           |                                                                                                                           |
| (89)      | Schievink et al (2012) | Fair                         | 20           |                                                                                                                           |
| (90)      | Takeuchi et al (2012)  | Fair                         | 15           |                                                                                                                           |
| (91)      | Yoon et al (2011)      | Fair                         | 30           | LPOP                                                                                                                      |
| (92)      | Cho et al (2011)       | Good                         | 56           | Sex, headache, brain MRI, leak location, first EBP, nontargeted EBP, targeted EBP, small EBP                              |
| (93)      | Bonetto et al (2011)   | Fair                         | 17           | Sex, symptoms duration, headache, other symptoms, brain MRI, conservative, first EBP, nontargeted EBP                     |
| (94)      | Watanabe et al (2011)  | Fair                         | 13           | Symptoms duration, headache, small EBP                                                                                    |
| (95)      | Franzini et al (2011)  | Fair                         | 74           |                                                                                                                           |

| Reference | Author (year)            | Quality grading <sup>a</sup> | Patients (n) | Meta-analyses                                                                                          |
|-----------|--------------------------|------------------------------|--------------|--------------------------------------------------------------------------------------------------------|
| (96)      | Liu et al (2011)         | Good                         | 55           |                                                                                                        |
| (97)      | Franzini et al (2010)    | Fair                         | 28           | Leak location                                                                                          |
| (98)      | Medina et al (2010)      | Fair                         | 13           | Sex, headache, spine MRI, first EBP                                                                    |
| (99)      | Ferrante et al (2010)    | Fair                         | 42           | Spine MRI, MRM, RIC                                                                                    |
| (100)     | Horikoshi et al (2010)   | Fair                         | 16           | Targeted EBP                                                                                           |
| (101)     | Adachi et al (2009)      | Fair                         | 10           | Age, sex, headache, other symptoms                                                                     |
| (102)     | Park et al (2009)        | Fair                         | 12           | Age, sex, headache, other symptoms, brain MRI, RIC, LPOP, conservative                                 |
| (103)     | Su et al (2009)          | Fair                         | 11           | Age, sex, headache, other symptoms, brain MRI, spine MRI, leak location, first EBP, nontargeted EBP    |
| (104)     | Mea et al (2009)         | Good                         | 90           | Brain MRI                                                                                              |
| (105)     | Wang et al (2009)        | Fair                         | 19           | CTM                                                                                                    |
| (106)     | Shankar et al (2009)     | Good                         | 17           | Sex, brain MRI                                                                                         |
| (107)     | Mea et al (2009)         | Fair                         | 90           |                                                                                                        |
| (108)     | Watanabe et al (2008)    | Fair                         | 18           | Age, headache, spine MRI, LPOP                                                                         |
| (109)     | Schievink et al (2008)   | Fair                         | 94           | Brain MRI, LPOP                                                                                        |
| (110)     | Yoo et al (2008)         | Fair                         | 15           | MRM, RIC, first EBP                                                                                    |
| (111)     | Albayram et al (2008)    | Good                         | 19           | MRMG                                                                                                   |
| (112)     | Hyun et al (2008)        | Good                         | 30           | Sex, headache, other symptoms, brain MRI, RIC, LPOP, leak location, conservative, first EBP, small EBP |
| (113)     | Tomoda et al (2008)      | Fair                         | 27           | Sex, other symptoms, conservative treatment, MRM, LPOP, first EBP                                      |
| (114)     | Fuh et al (2008)         | Fair                         | 53           |                                                                                                        |
| (115)     | Mea et al (2008)         | Fair                         | 70           |                                                                                                        |
| (116)     | Mea et al (2007)         | Good                         | 59           | Sex                                                                                                    |
| (117)     | Chung et al (2007)       | Fair                         | 10           |                                                                                                        |
| (118)     | Farb et al (2007)        | Good                         | 12           |                                                                                                        |
| (119)     | Lai et al (2007)         | Fair                         | 40           |                                                                                                        |
| (120)     | Schievink et al (2007)   | Fair                         | 11           |                                                                                                        |
| (121)     | Schievink et al (2007)   | Fair                         | 80           |                                                                                                        |
| (122)     | Tsai et al (2007)        | Fair                         | 17           |                                                                                                        |
| (123)     | Wiesemann et al (2006)   | Fair                         | 10           | Age, sex, symptoms duration, headache, other symptoms, brain MRI, LPOP, conservative                   |
| (124)     | Chung et al (2006)       | Fair                         | 67           | RIC                                                                                                    |
| (125)     | Hannerz et al (2006)     | Fair                         | 12           | Sex, headache, other symptoms, brain MRI, conservative, first EBP, nontargeted EBP, large EBP          |
| (126)     | Cohen-Gadol et al (2006) | Fair                         | 13           | Sex, headache, other symptoms, brain MRI, leak location                                                |
| (127)     | Chung et al (2005)       | Fair                         | 53           | Age, spine MRI, conservative treatment                                                                 |
| (128)     | Kong et al (2005)        | Fair                         | 13           | Age, symptoms duration, spine MRI, CTM, RIC, LPOP, conservative                                        |
| (129)     | Schievink et al (2005)   | Fair                         | 33           | Leak location                                                                                          |
| (130)     | Schievink et al (2005)   | Fair                         | 20           |                                                                                                        |
| (131)     | Ferrante et al (2004)    | Fair                         | 18           | LPOP                                                                                                   |
| (132)     | Berrior et al (2004)     | Fair                         | 33           | Sex, symptoms duration, headache, other symptoms, brain MRI, first EBP, nontargeted EBP                |
| (133)     | Ferrante et al (2004)    | Fair                         | 12           |                                                                                                        |
| (134)     | Schievink et al (2004)   | Good                         | 18           |                                                                                                        |
| (135)     | Schievink et al (2004)   | Good                         | 25           |                                                                                                        |
| (136)     | Miyazawa et al (2003)    | Fair                         | 10           | Age, headache, other symptoms, brain MRI, RIC, LPOP, leak location                                     |
| (137)     | Chen et al (2003)        | Fair                         | 13           |                                                                                                        |
| (138)     | Schievink et al (2003)   | Good                         | 18           |                                                                                                        |
| (139)     | Lin et al (2002)         | Fair                         | 15           | LPOP                                                                                                   |
| (140)     | Schrijver et al (2002)   | Good                         | 20           |                                                                                                        |
| (141)     | Chung et al (2000)       | Fair                         | 30           | Headache location                                                                                      |
| (142)     | Chen et al (1999)        | Good                         | 13           |                                                                                                        |
| (143)     | Schievink et al (1998)   | Good                         | 10           |                                                                                                        |
| (144)     | Schievink et al (1996)   | Fair                         | 11           | Spine MRI, RIC                                                                                         |

<sup>a</sup>Based on NIH Quality Assessment Tool for Case Series Studies  
CTM: CT myelography, EBP: Epidural Blood Patch, LPOP: Lumbar Puncture Opening Pressure, MRM: MR Myelography, MRMG: MR myelography with intrathecal Gadolinium, RIC: Radionuclide Cisternography

**eFigure 1. Flowchart of the selection process for articles**

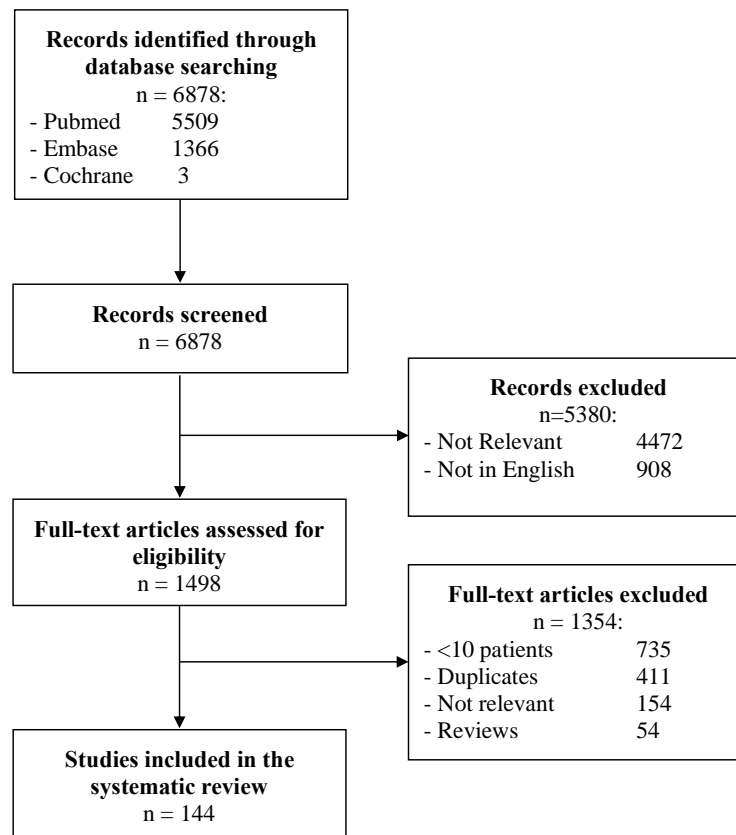

**eFigure 2. Age meta-analysis (mean years)**

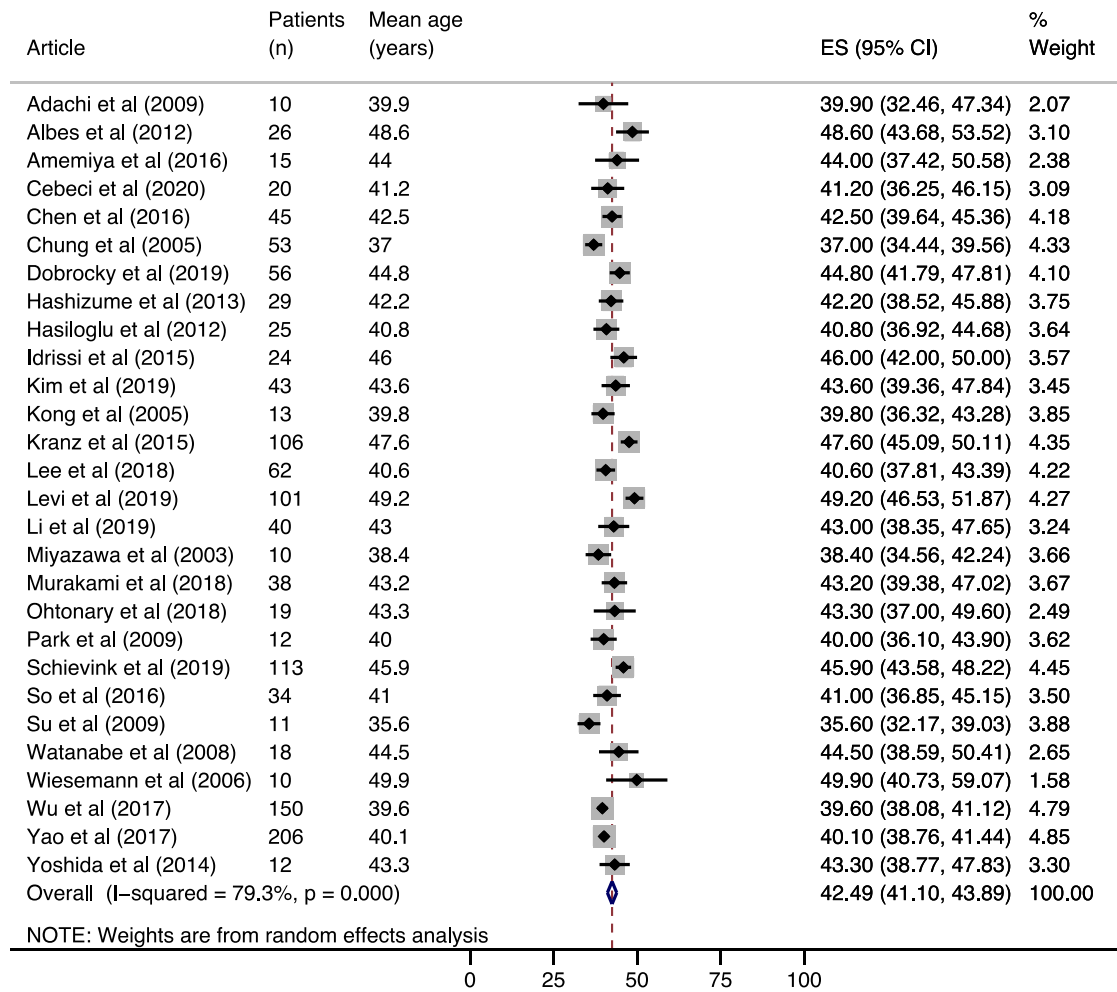



**eFigure 3. Sex meta-analysis (proportion of female patients)**

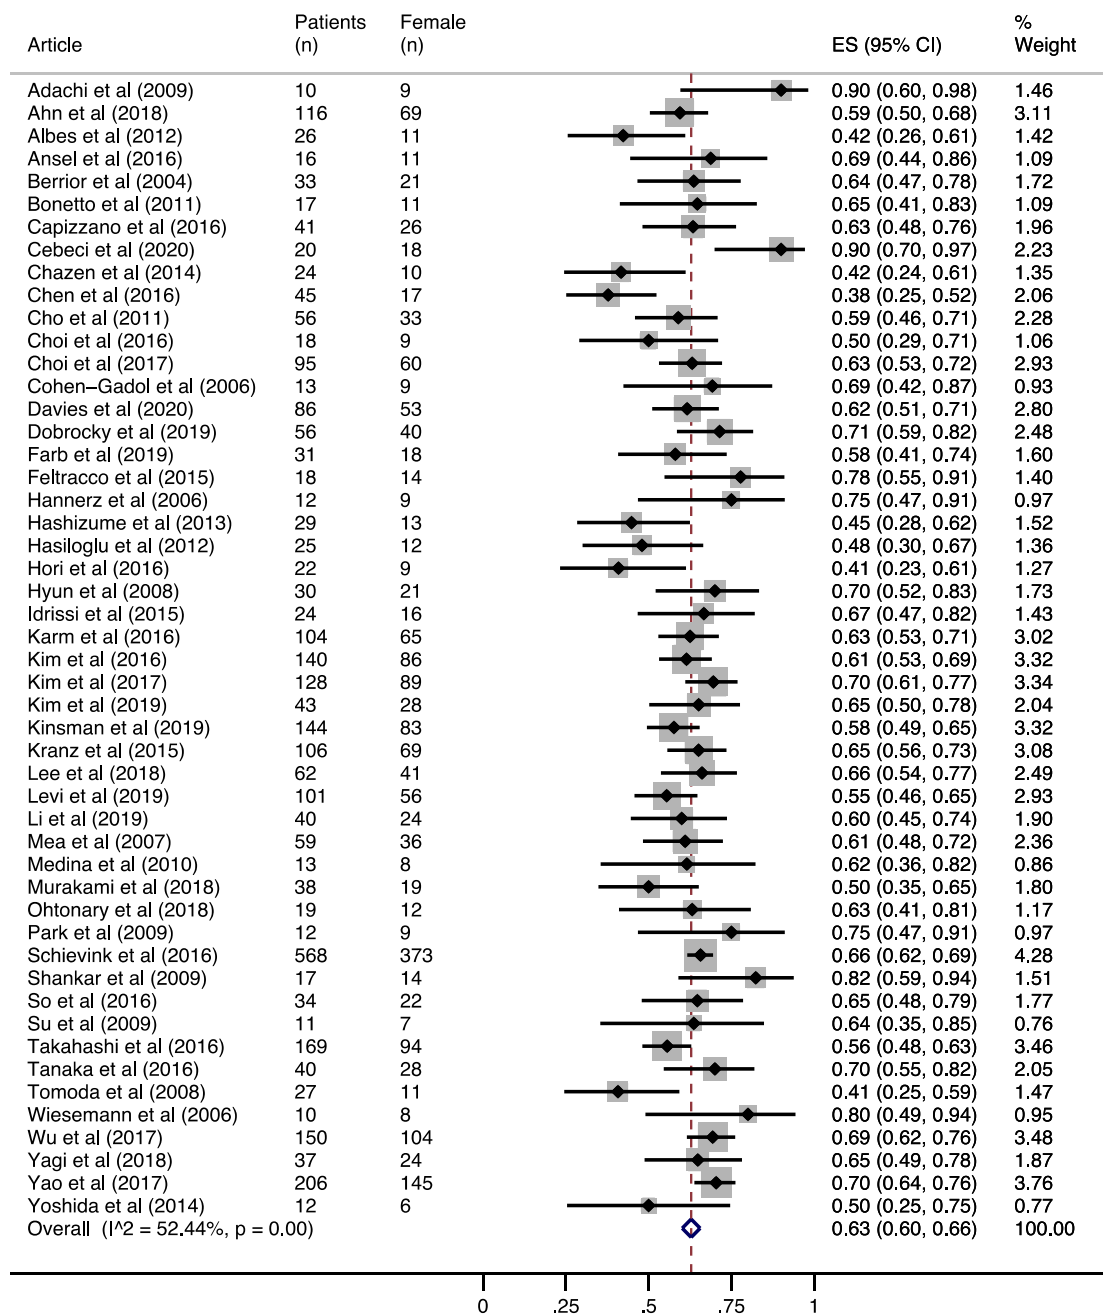

**eFigure 4. Symptoms duration meta-analysis (mean days)**

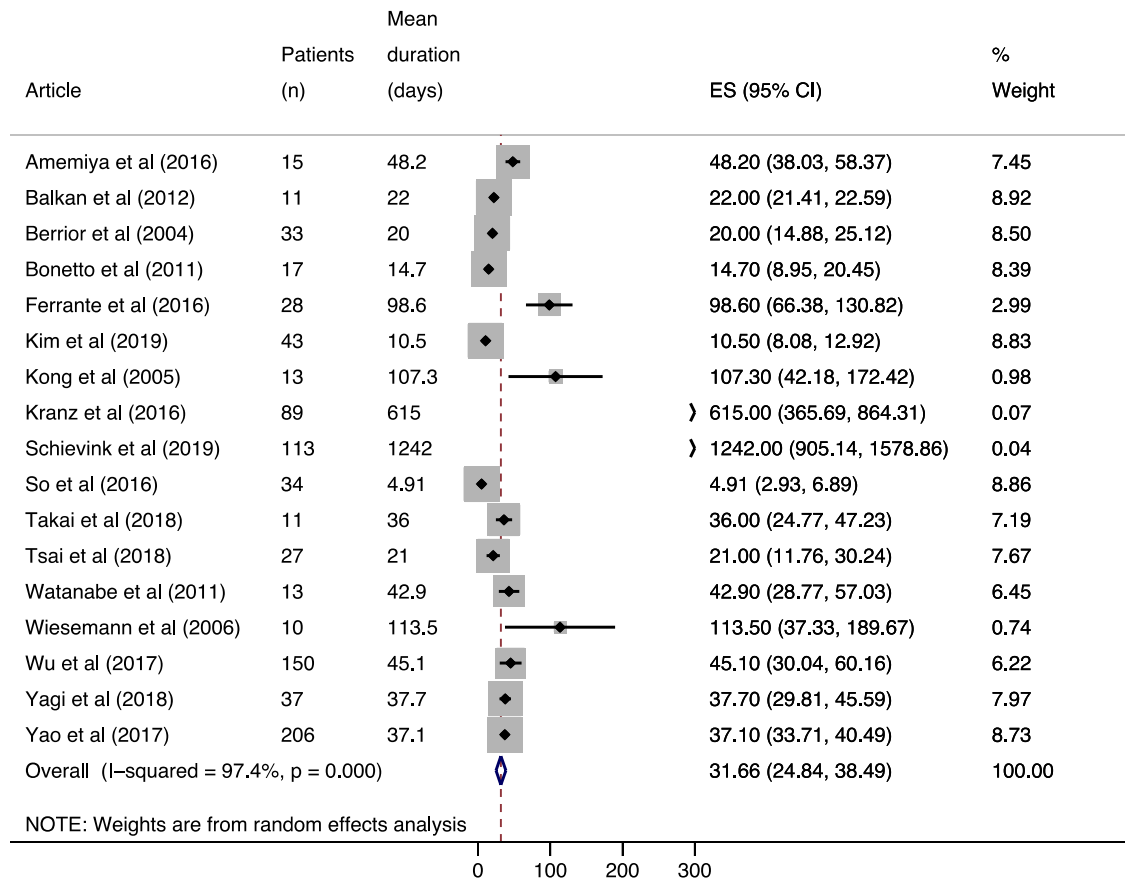

**eFigure 5a. Meta-analysis of proportions of patients with headache**

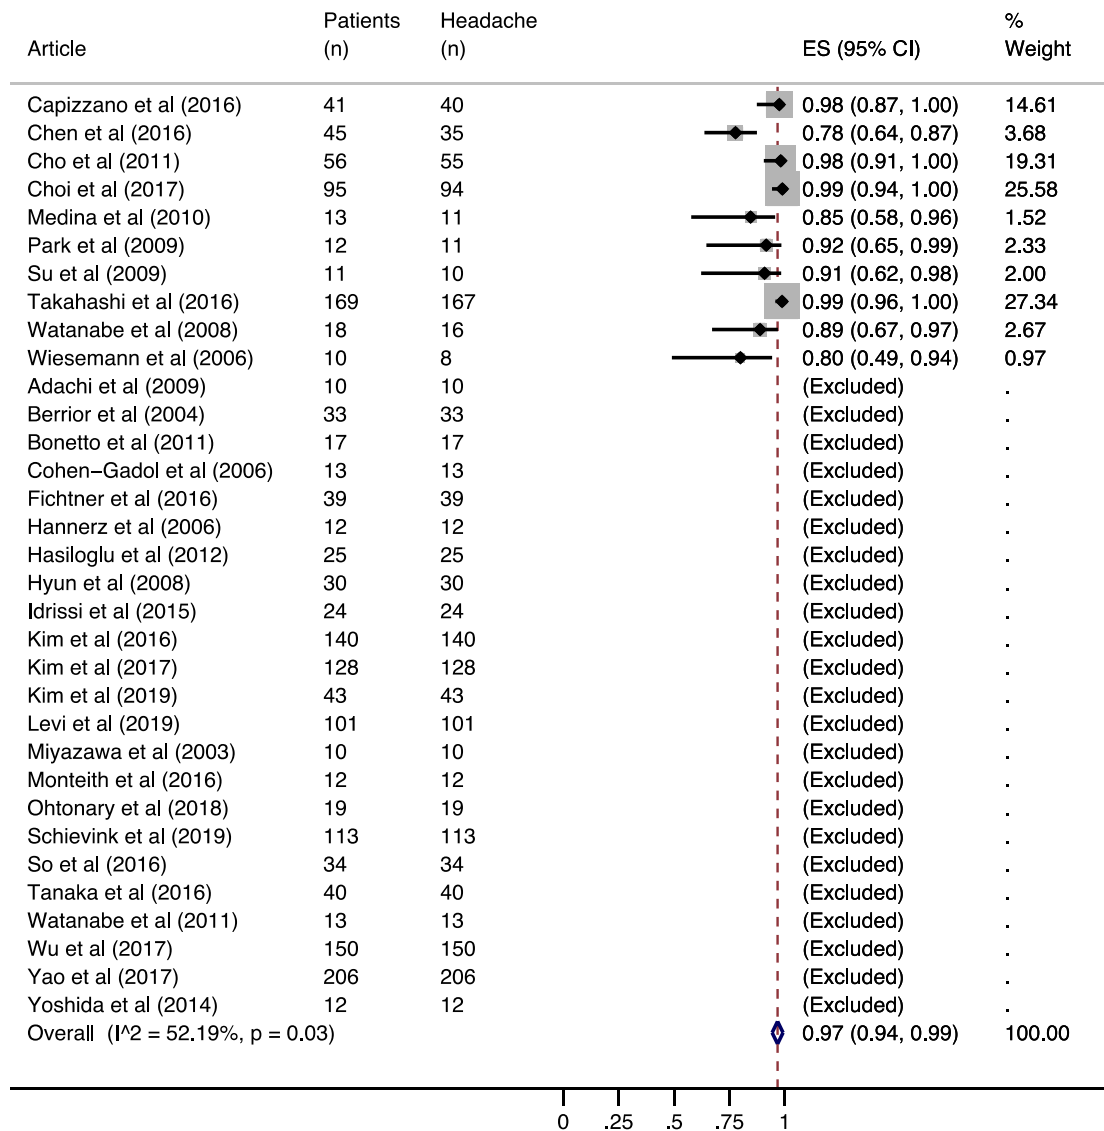

**eFigure 5b. Meta-analysis of proportions of patients without headache**

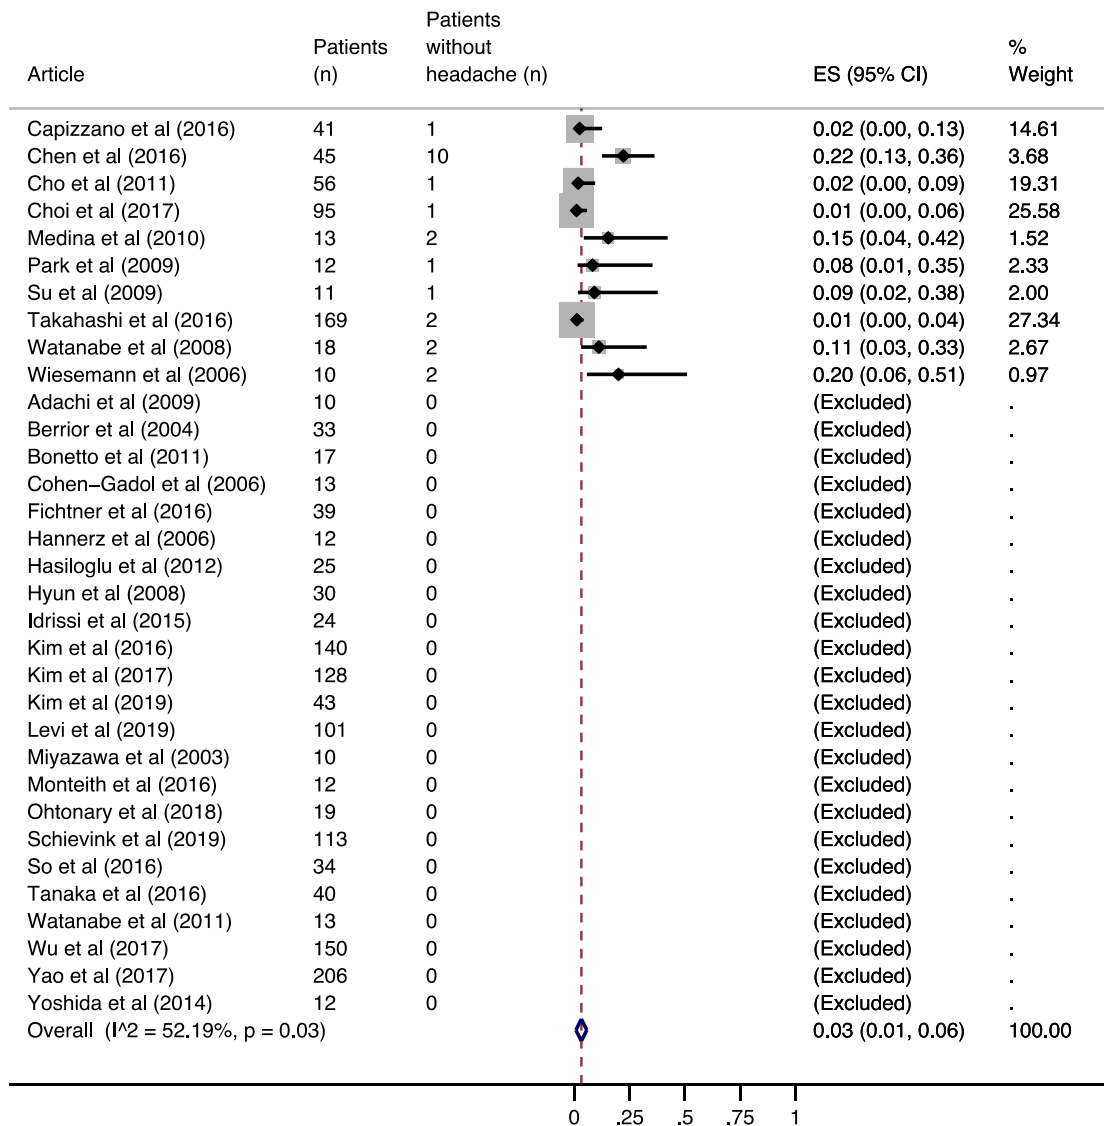

**eFigure 6a. Meta-analysis of proportions of patients with orthostatic headache**

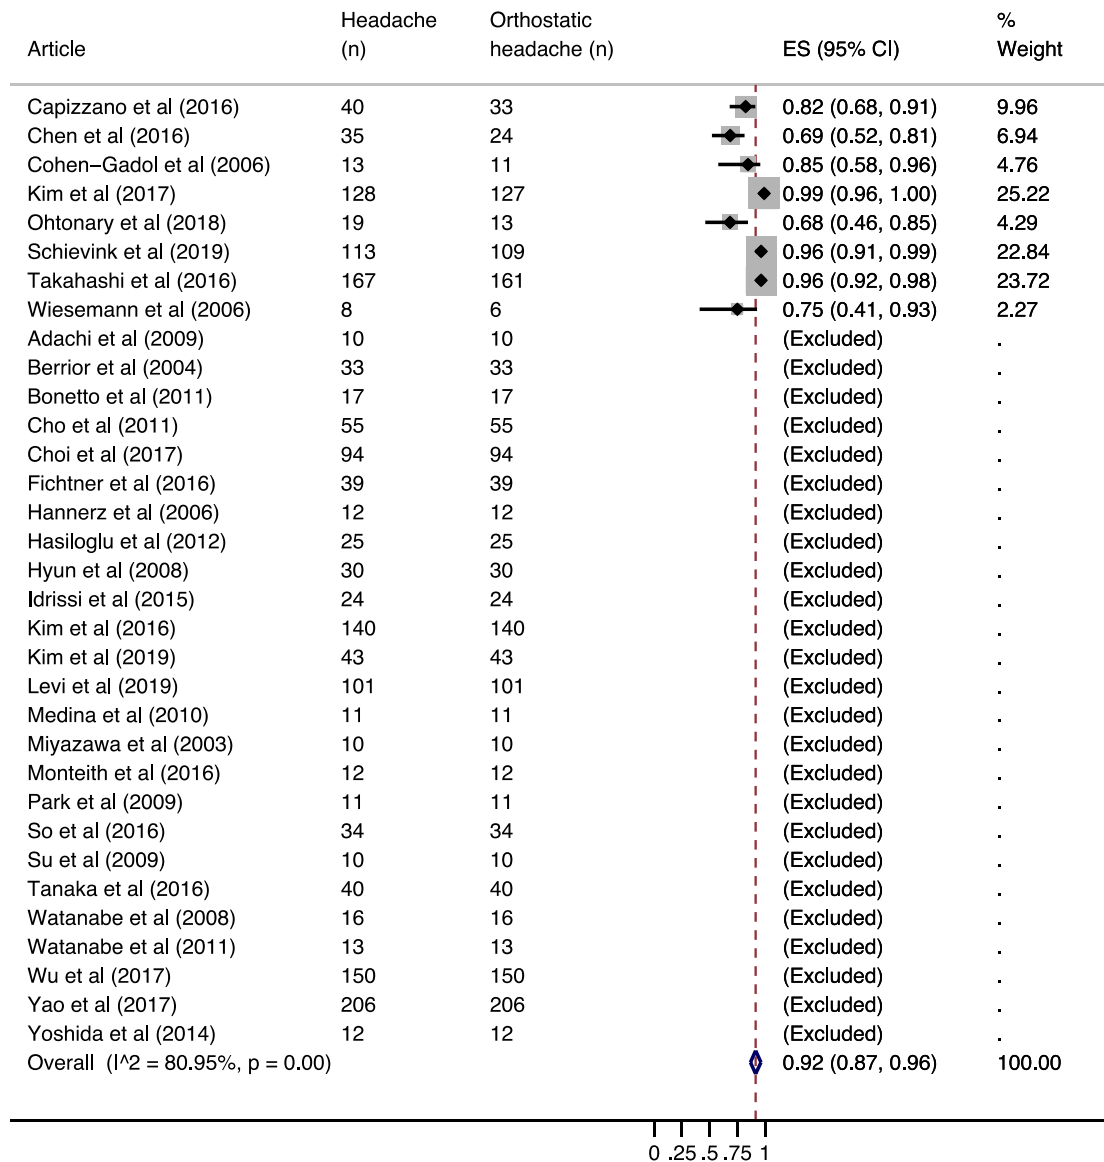

**eFigure 6b. Meta-analysis of proportions of patients with non-orthostatic headache**

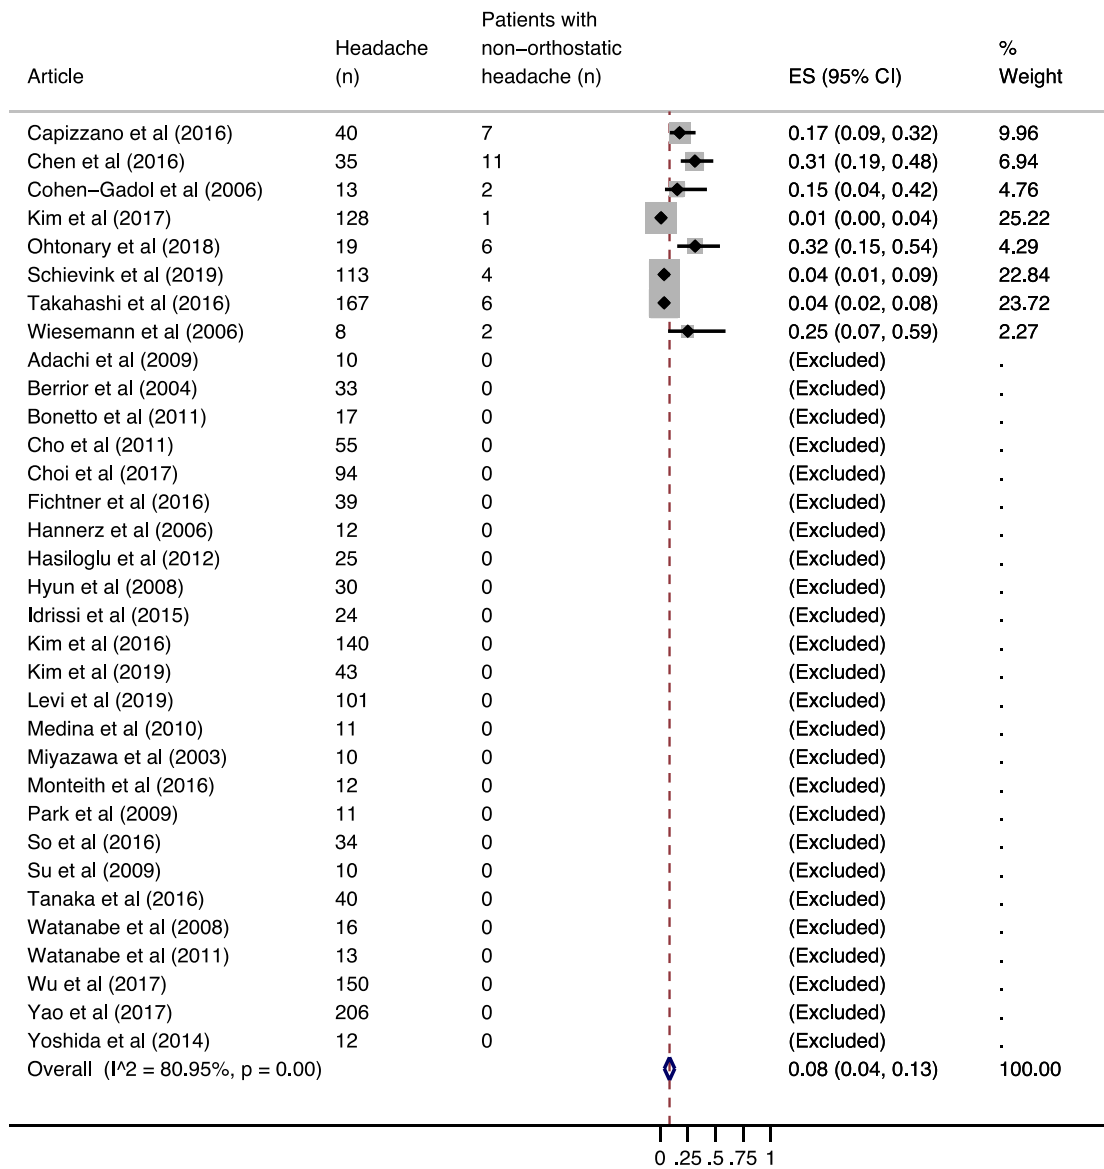

**eFigure 7a. Meta-analysis of proportions of headache location (diffuse)**

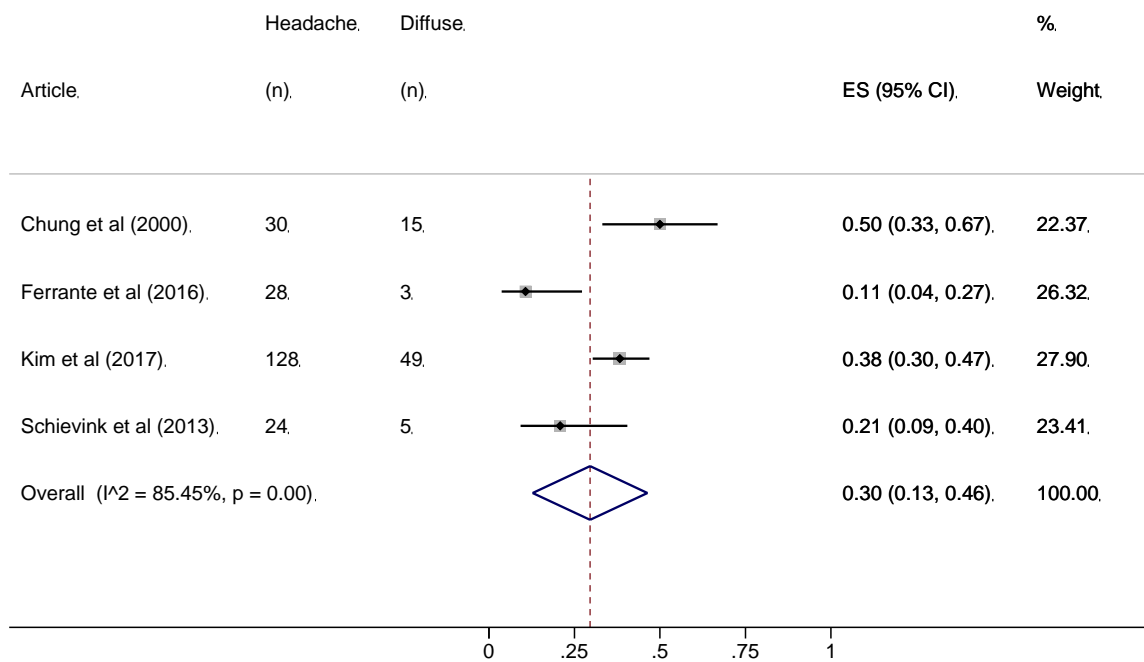

**eFigure 7b. Meta-analysis of proportions of headache location (occipital)**

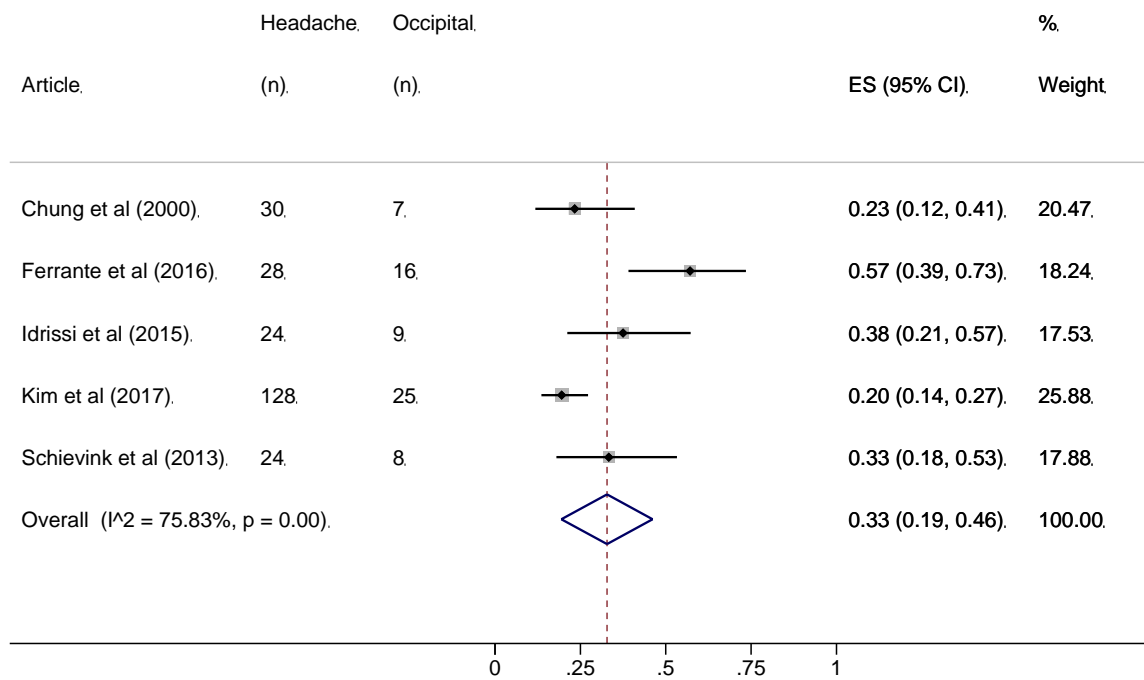

**eFigure 7c. Meta-analysis of proportions of headache location (frontal)**

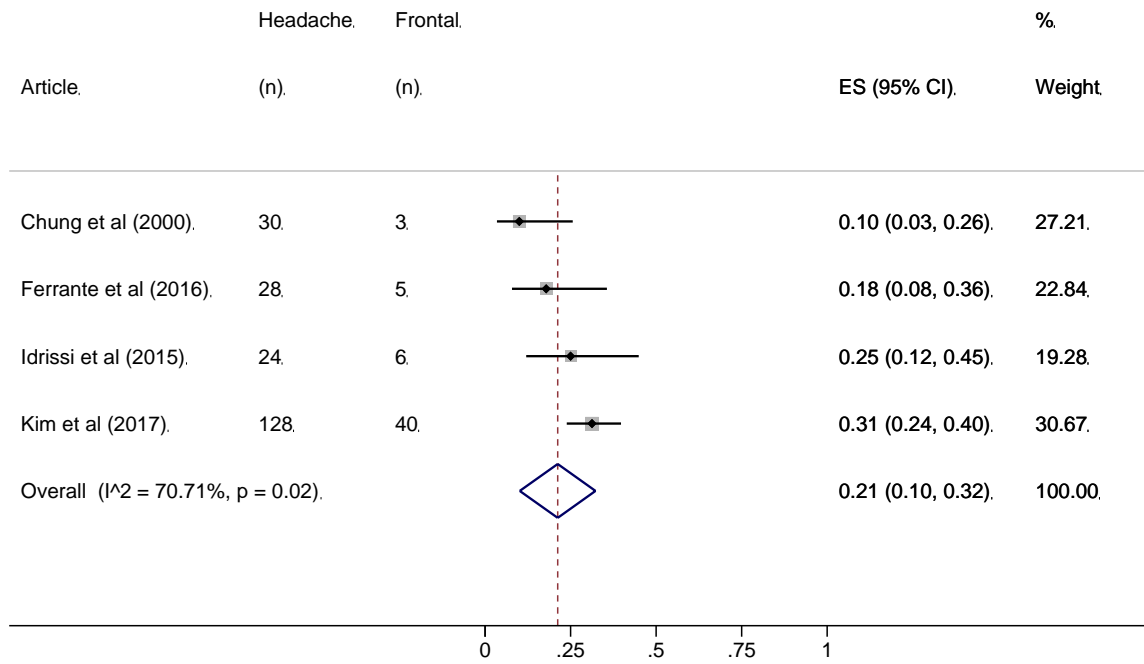

**eFigure 7d. Meta-analysis of proportions of headache location (fronto-occipital)**

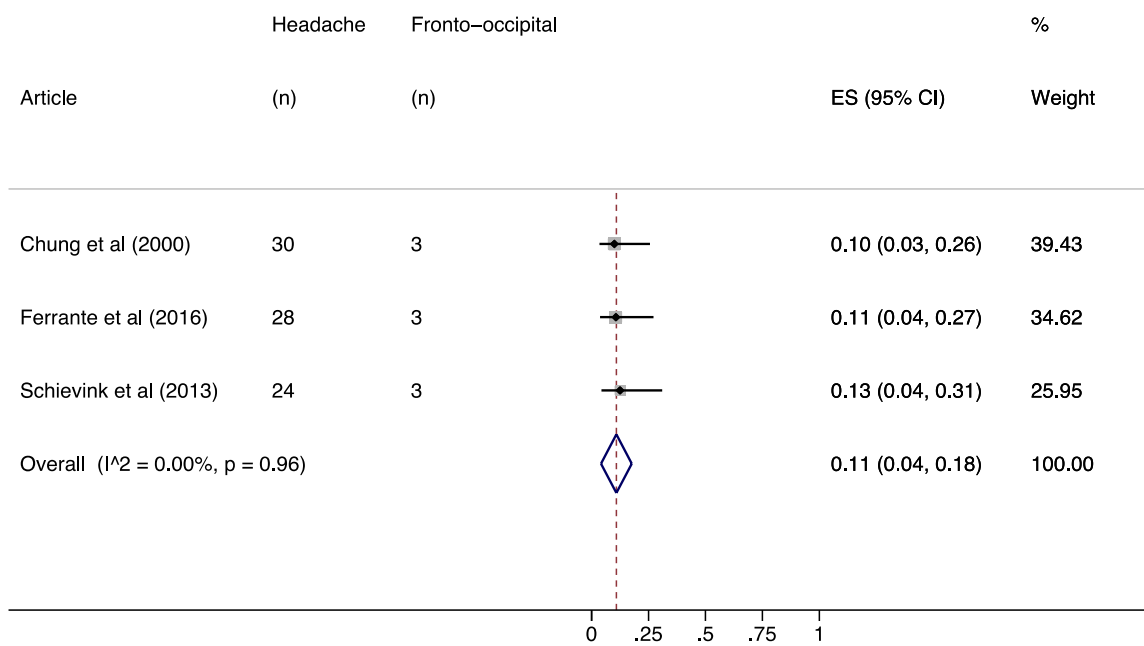



**eFigure 7e. Meta-analysis of proportions of headache location (temporal)**

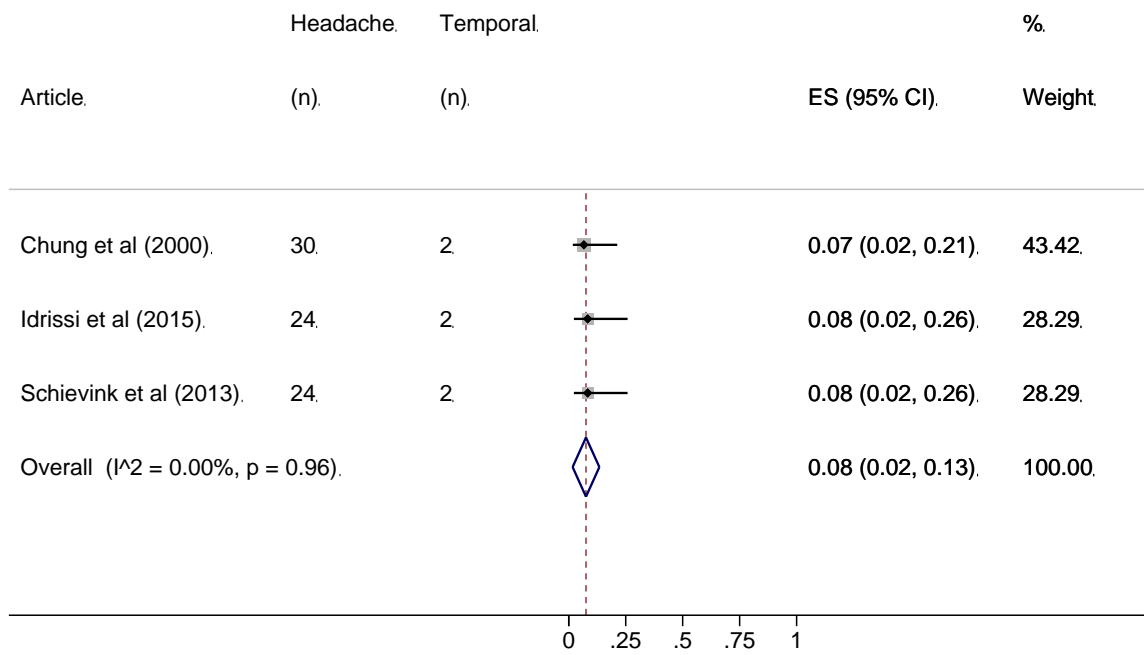

**eFigure 8a. Meta-analysis of proportions of patients with nausea/vomiting**

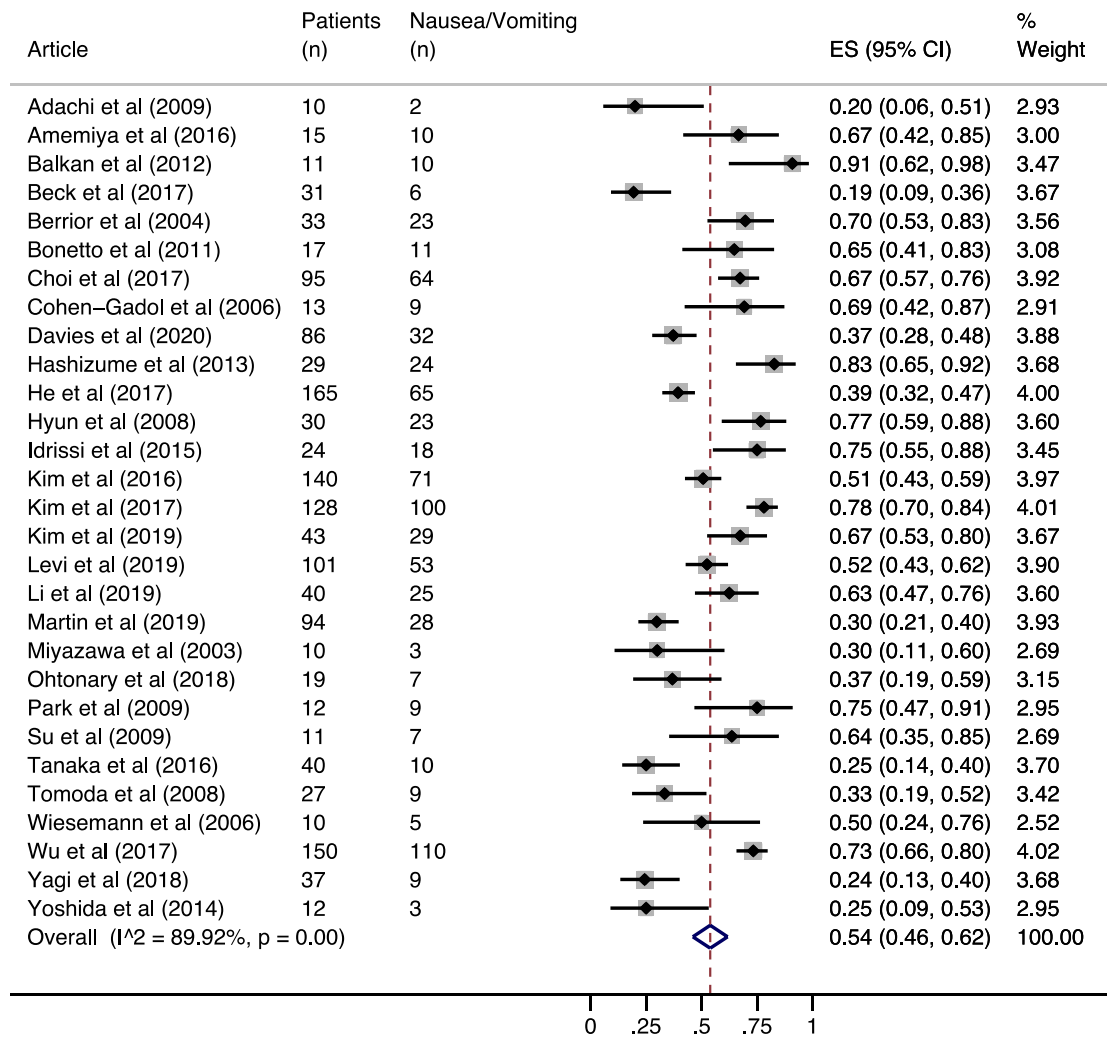

**eFigure 8b. Meta-analysis of proportions of patients with neck pain/stiffness**

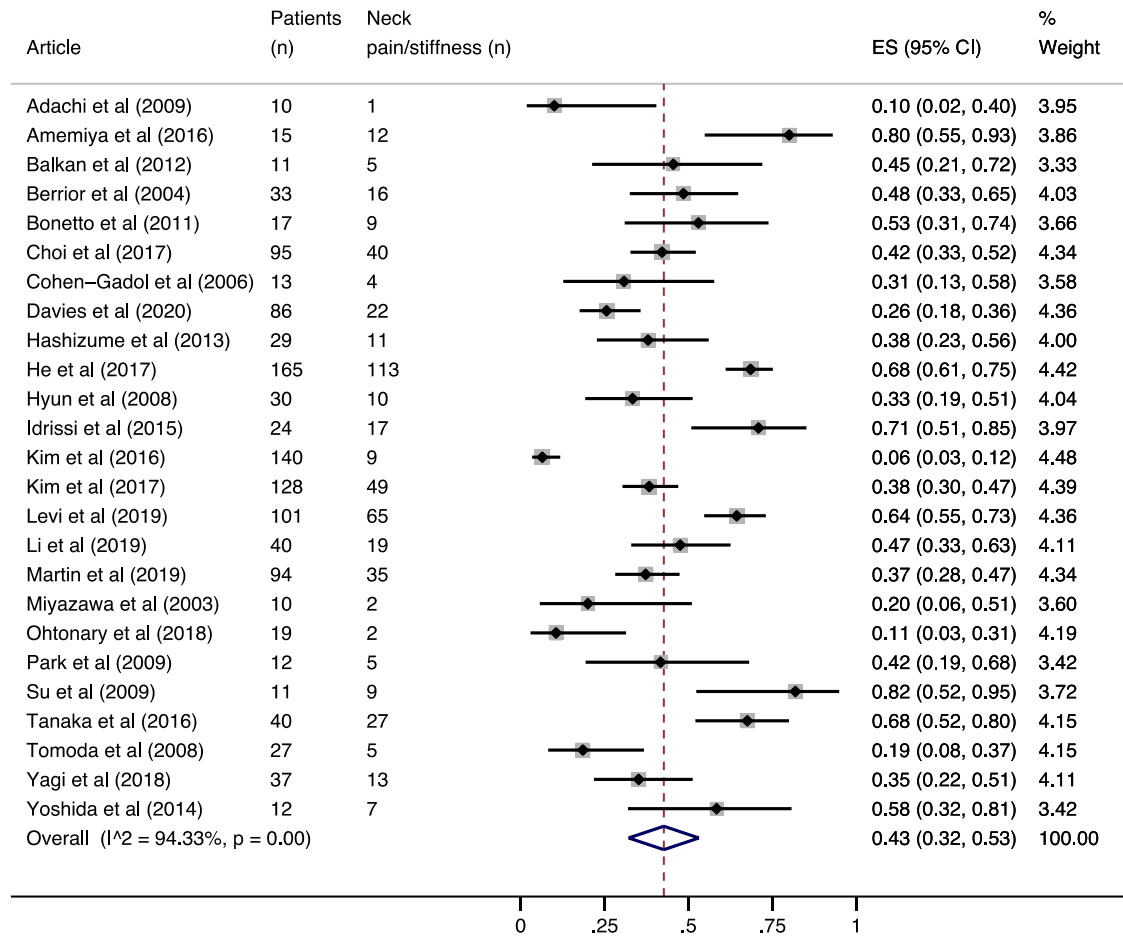

**eFigure 8c. Meta-analysis of proportions of patients with tinnitus**

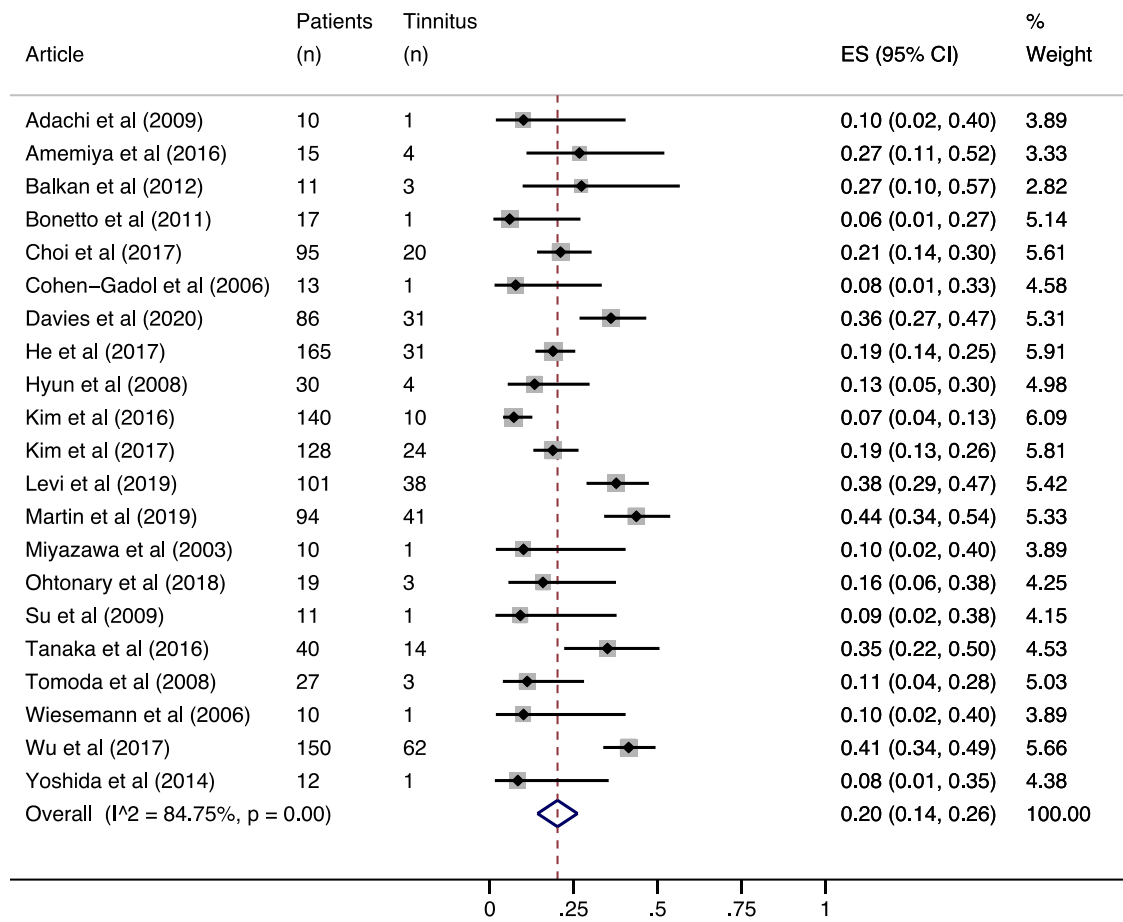

**eFigure 8d. Meta-analysis of proportions of patients with dizziness**

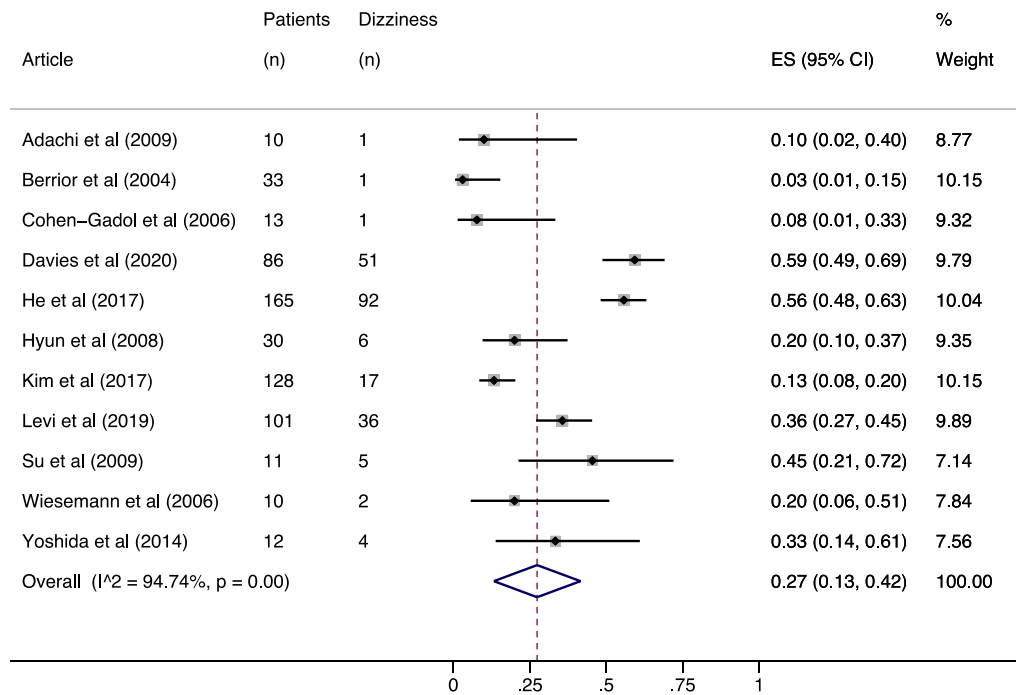

**eFigure 8e. Meta-analysis of proportions of patients with hearing disturbances**

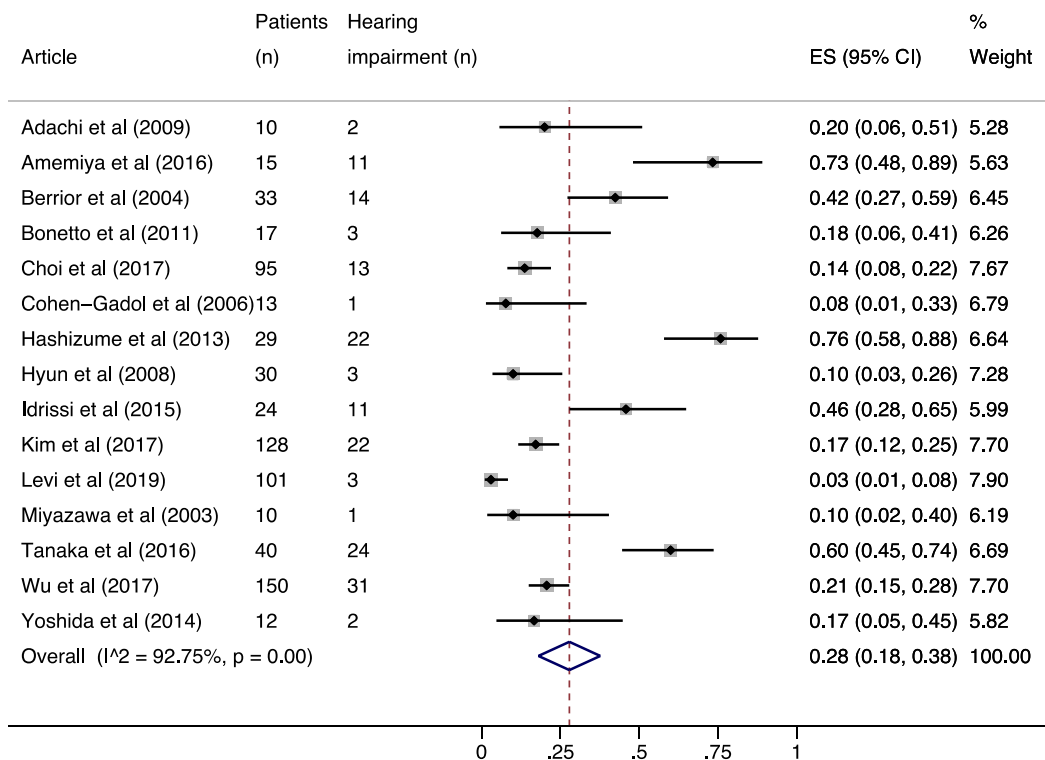

**eFigure 8f. Meta-analysis of proportions of patients with photophobia**

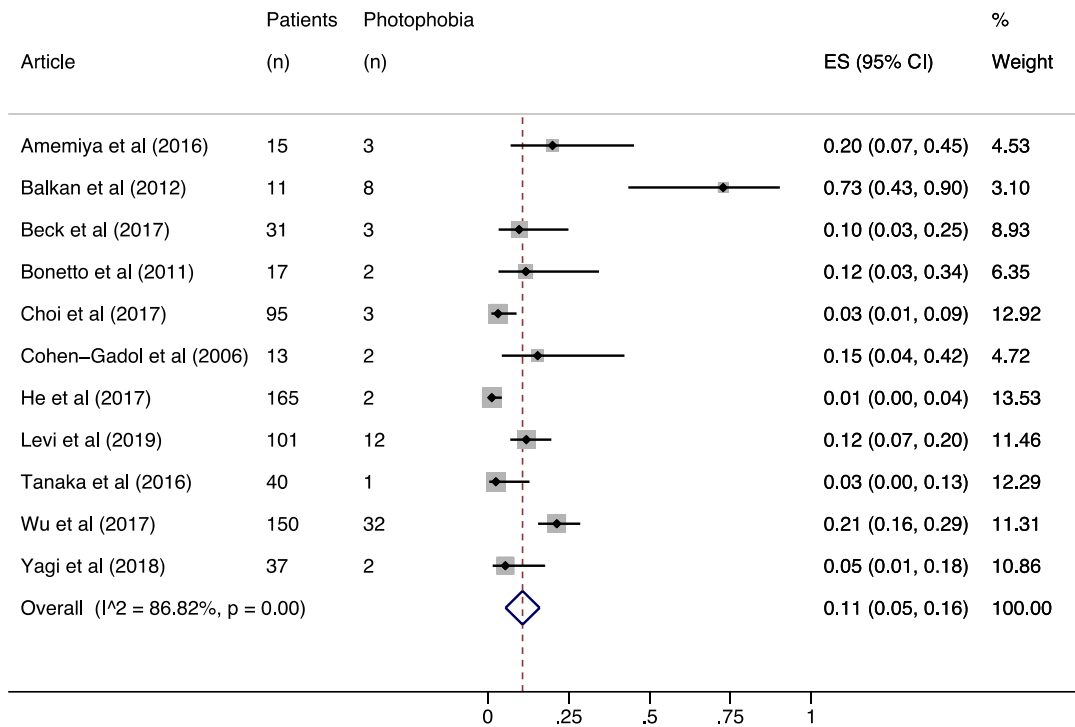

**eFigure 8g. Meta-analysis of proportions of patients with cognitive symptoms**

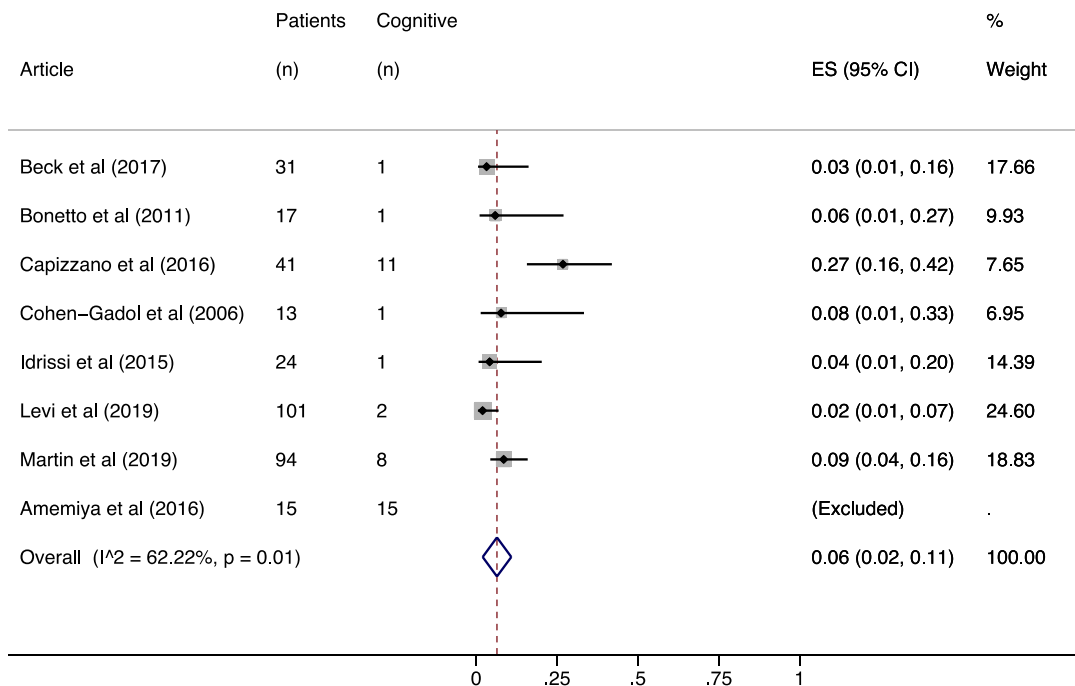

**eFigure 8h. Meta-analysis of proportions of patients with diplopia**

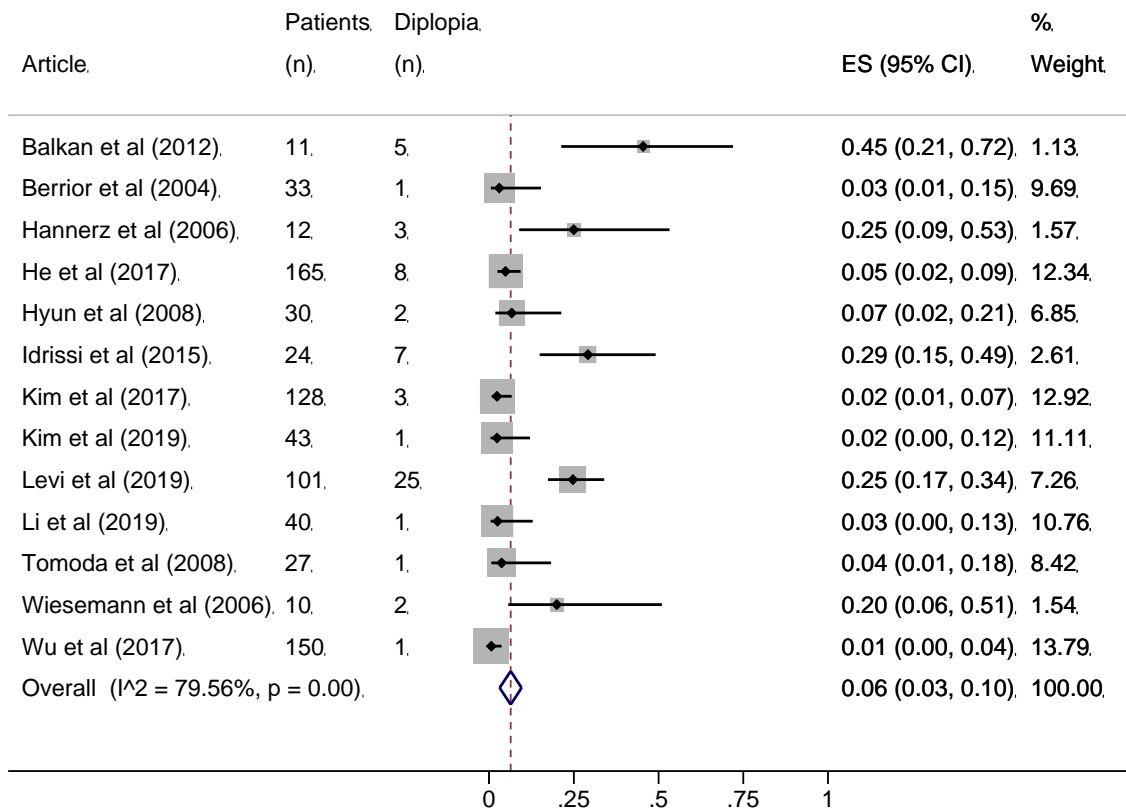

**eFigure 8i. Meta-analysis of proportions of patients with other ear-related symptoms**

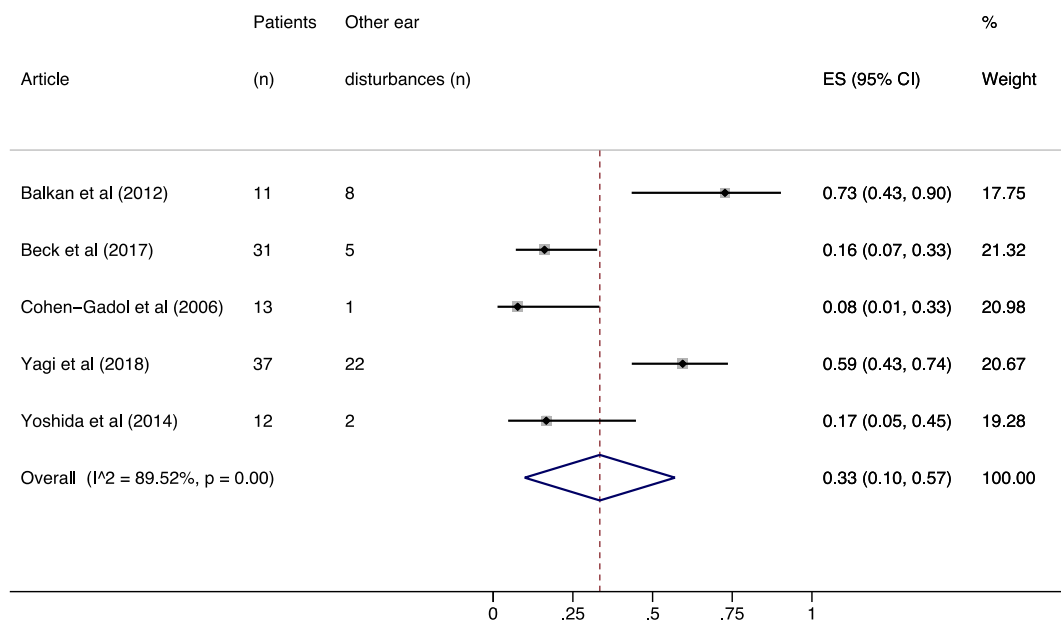

**eFigure 8l. Meta-analysis of proportions of patients with vertigo**

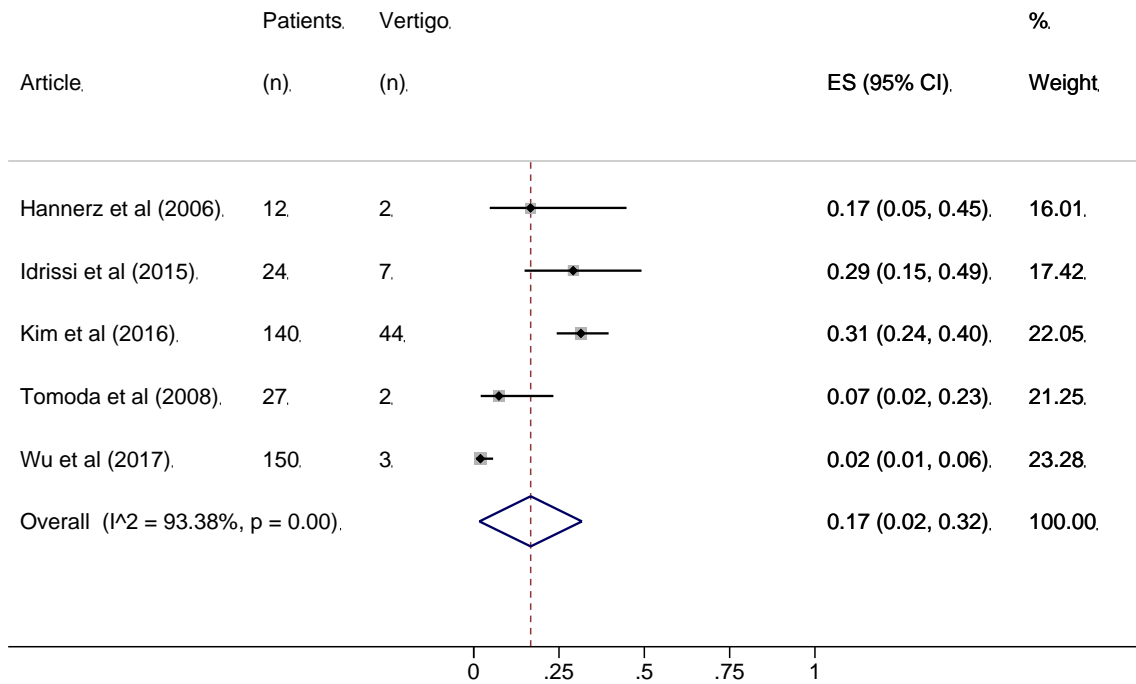

**eFigure 8m. Meta-analysis of proportions of patients with movement disorders**

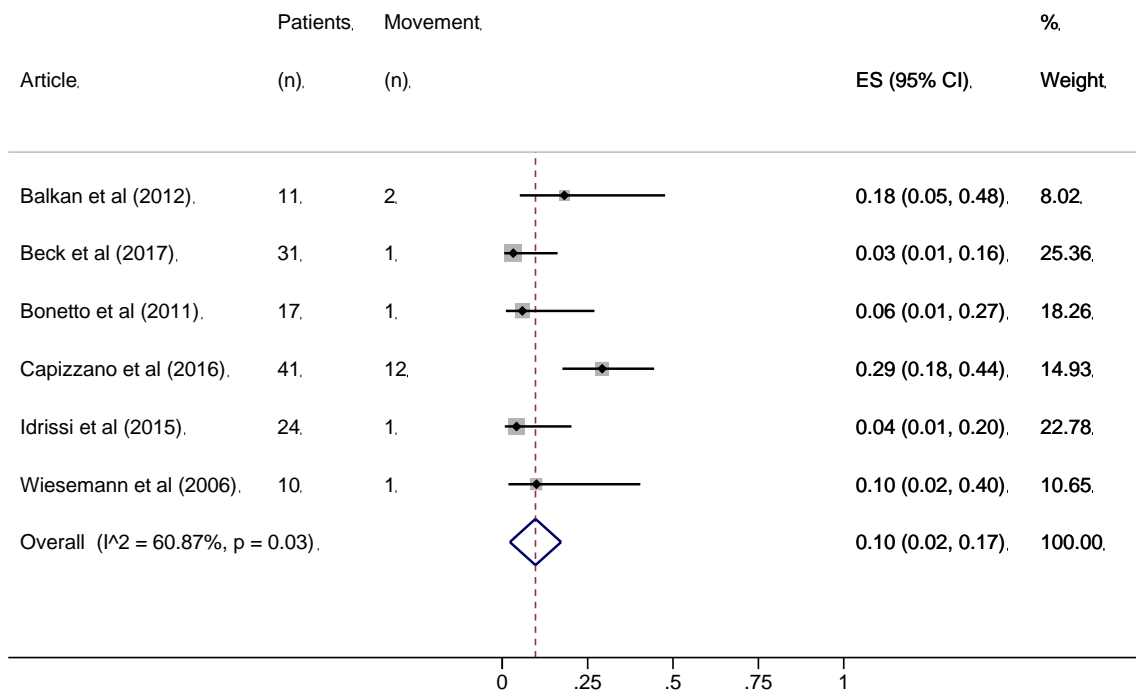



**eFigure 8n. Meta-analysis of proportions of patients with back pain**

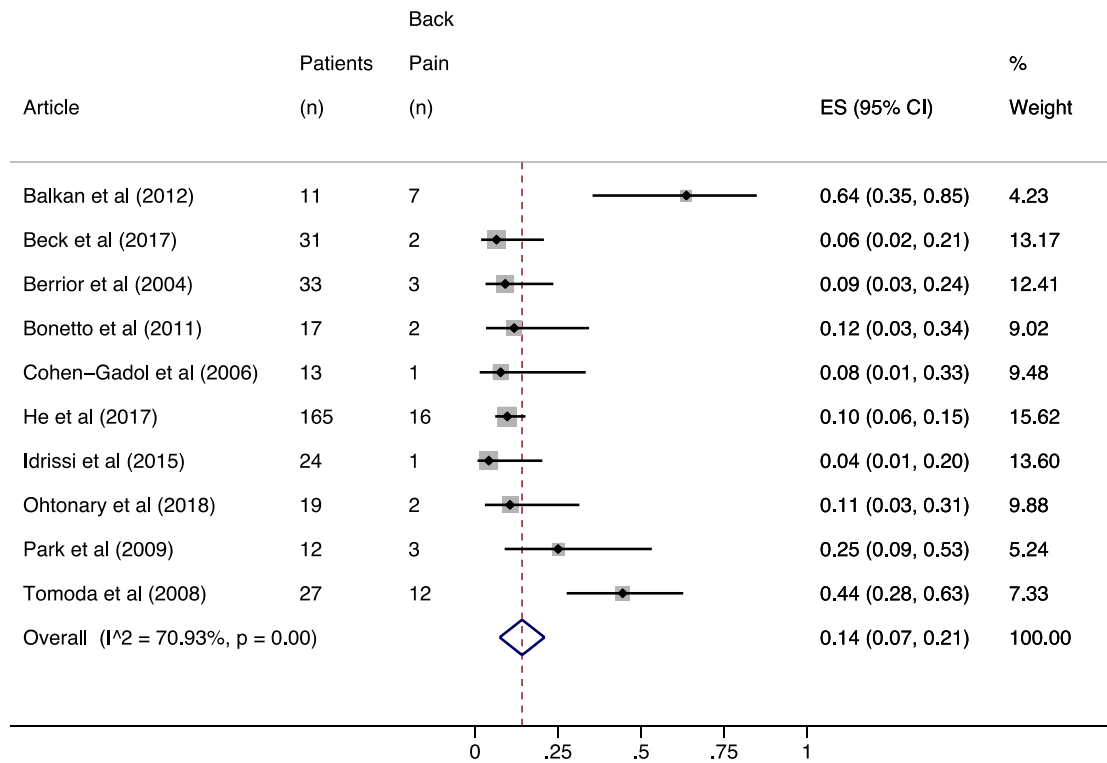

**eFigure 8o. Meta-analysis of proportions of patients with other visual symptoms**

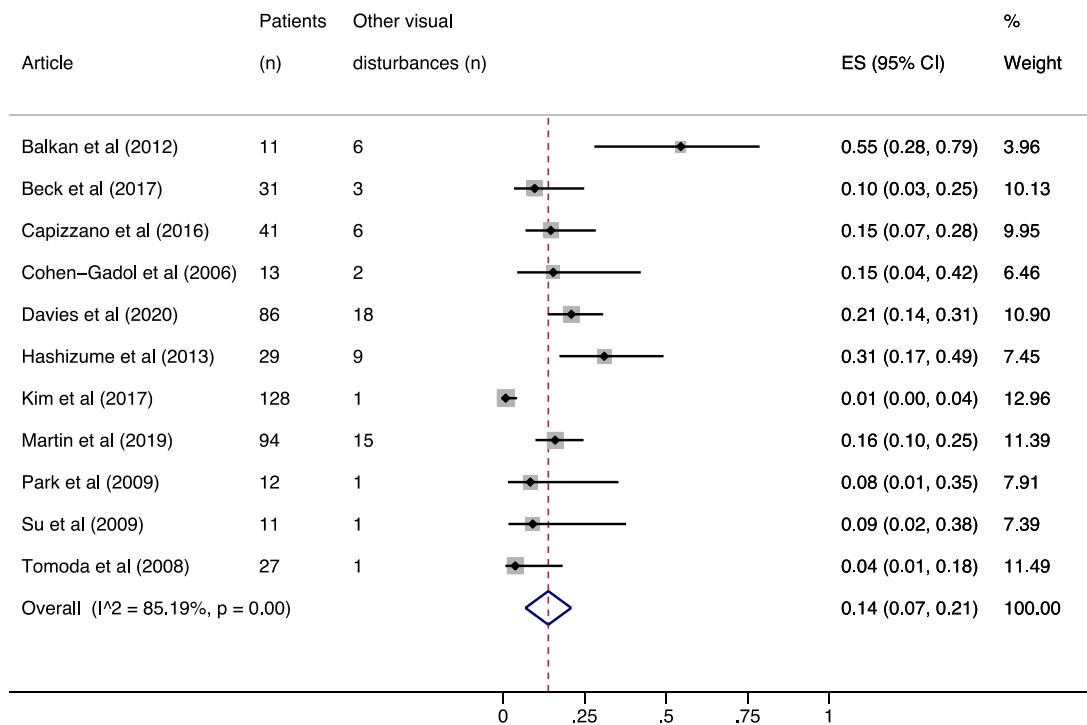

**eFigure 8p. Meta-analysis of proportions of patients with reduced consciousness**

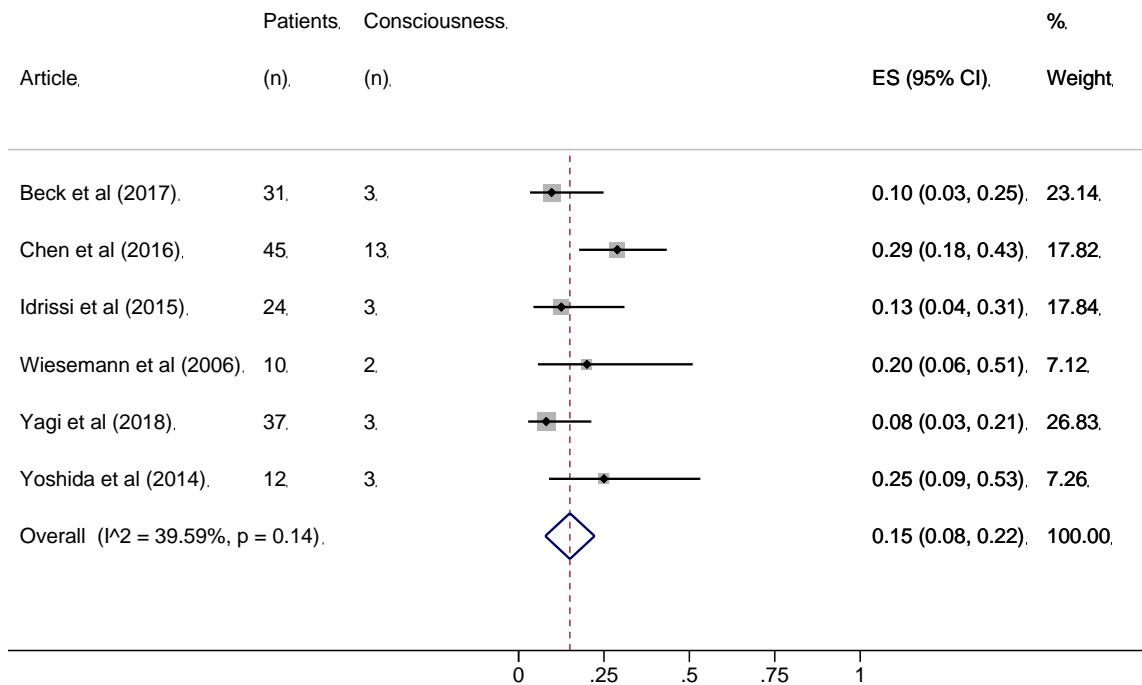

**eFigure 9a. Meta-analysis of proportions of diffuse pachymeningeal enhancement (DPE) in brain MRI**

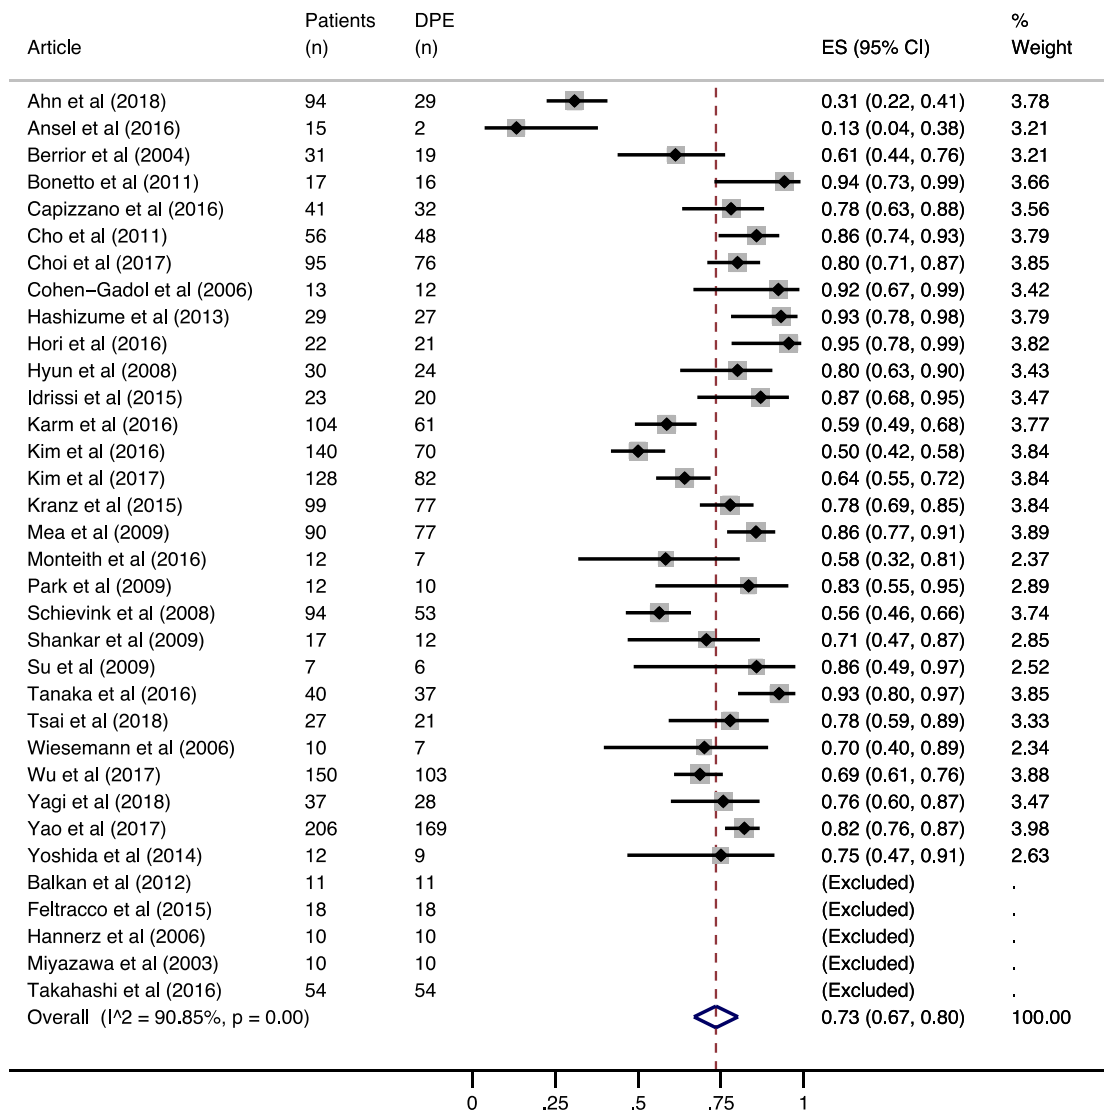

**eFigure 9b. Meta-analysis of proportions of subdural collections (SDC) in brain MRI**

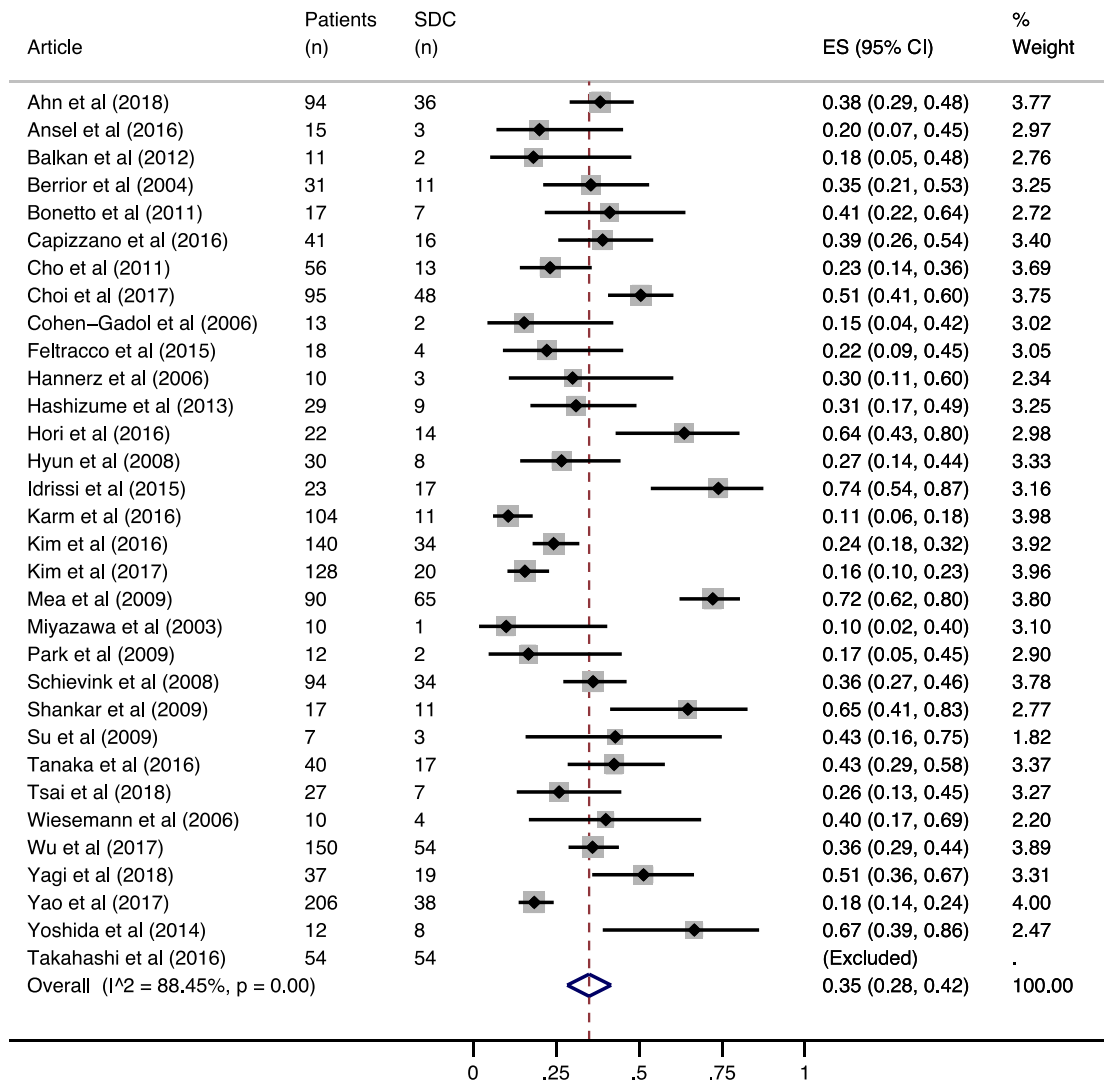

**eFigure 9c. Meta-analysis of proportions of brain sagging brain MRI**

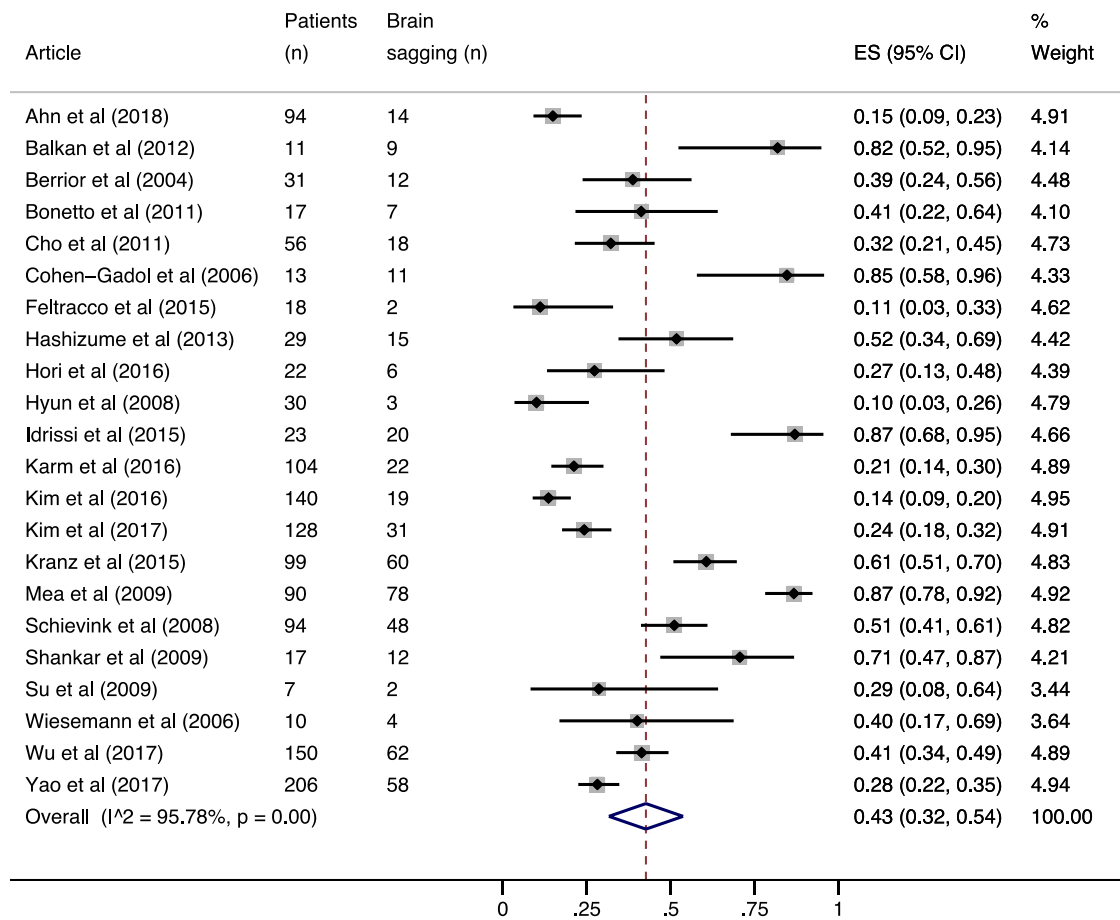

**eFigure 9d. Meta-analysis of proportions of enlarged pituitary gland (EPG) in brain MRI**

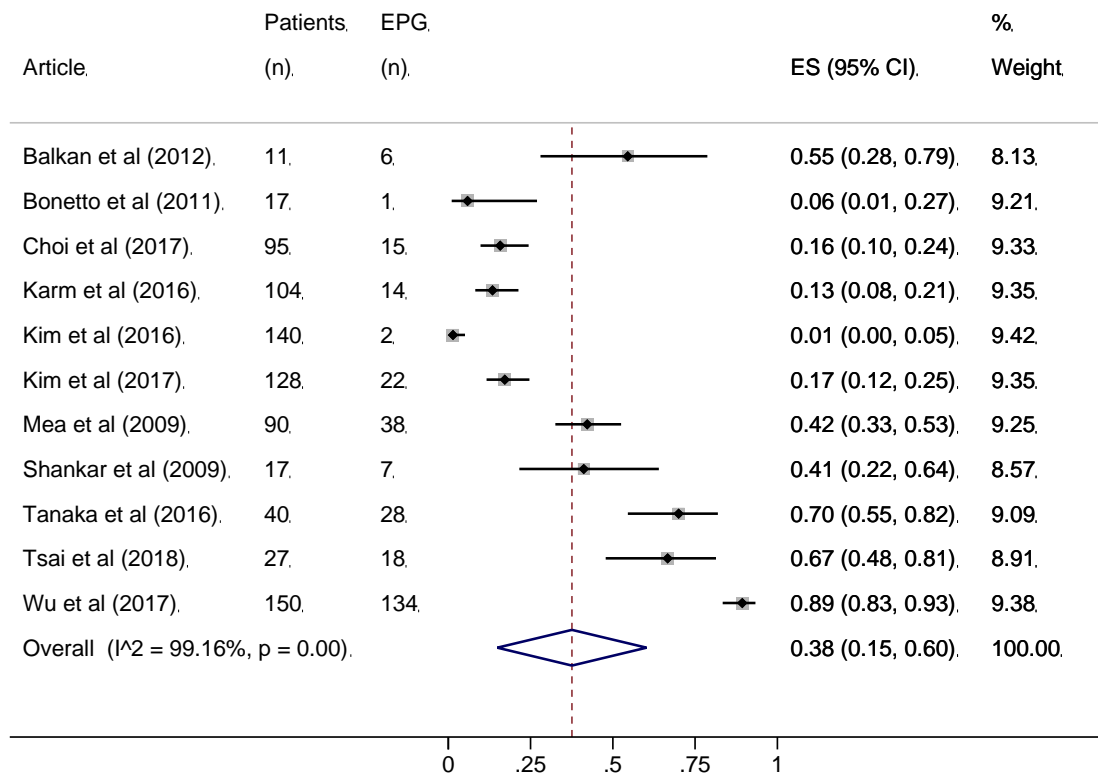

**eFigure 9e. Meta-analysis of proportions of venous engorgement in brain MRI**

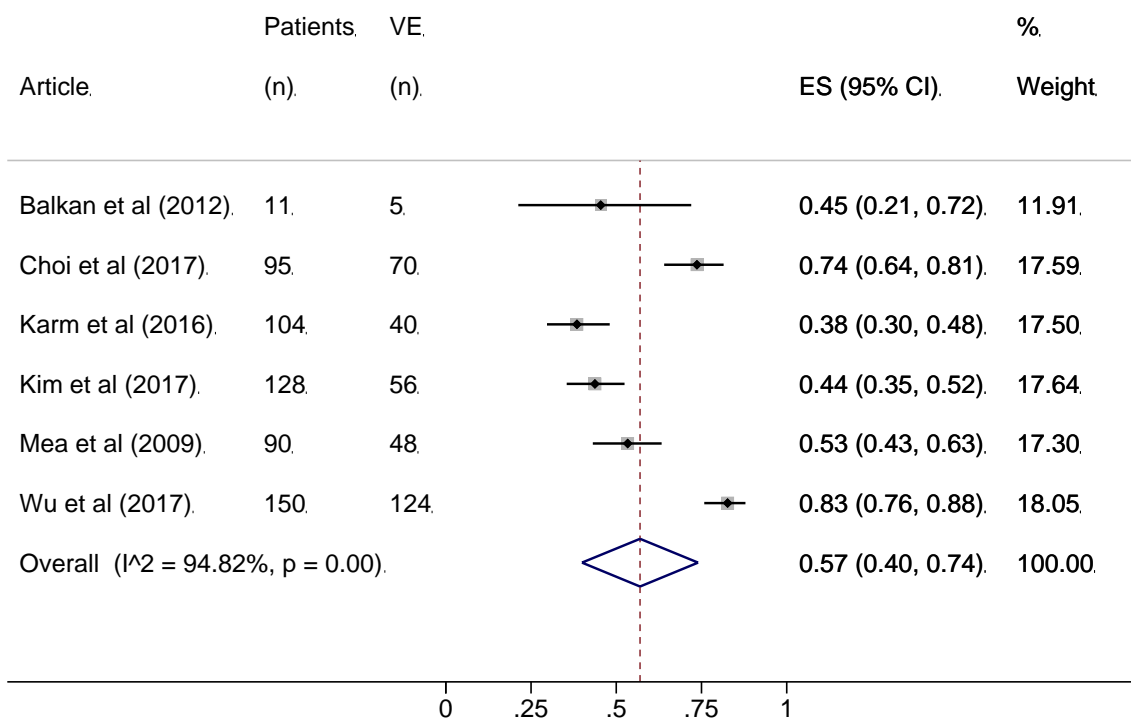

**eFigure 9f. Meta-analysis of proportions of normal brain MRI**

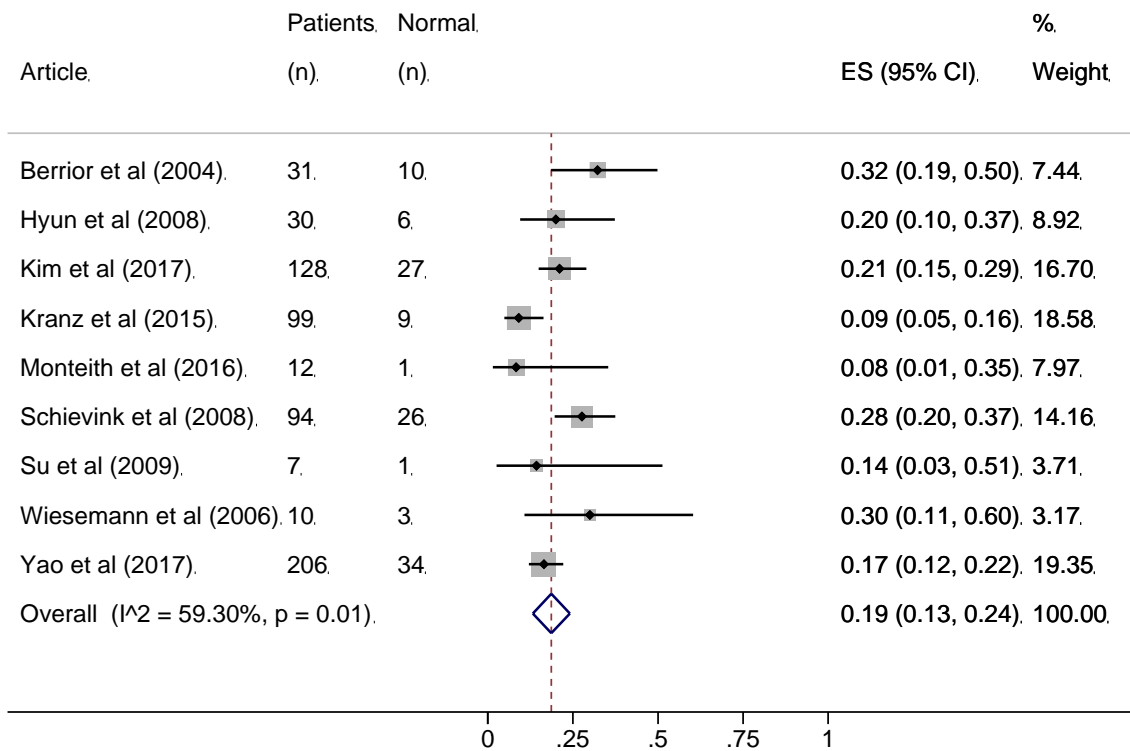

**eFigure 10. Meta-analysis of proportions of positive findings in spinal MRI**

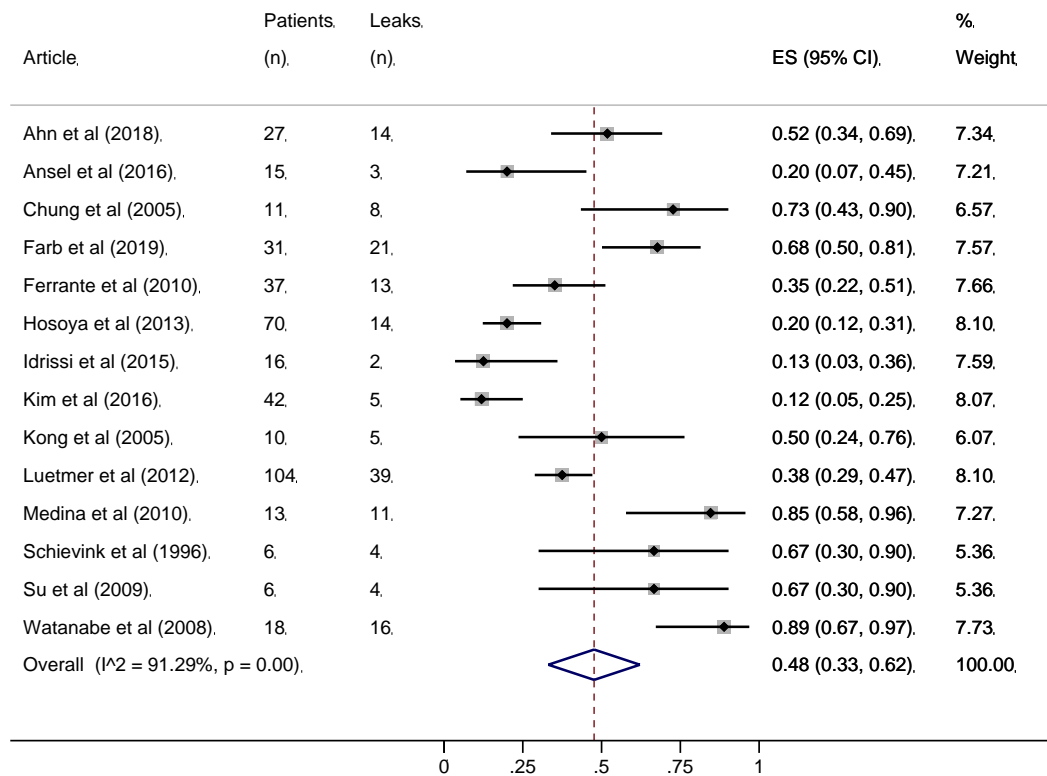

**eFigure 11. Meta-analysis of proportions of positive findings in CT myelography (CTM)**

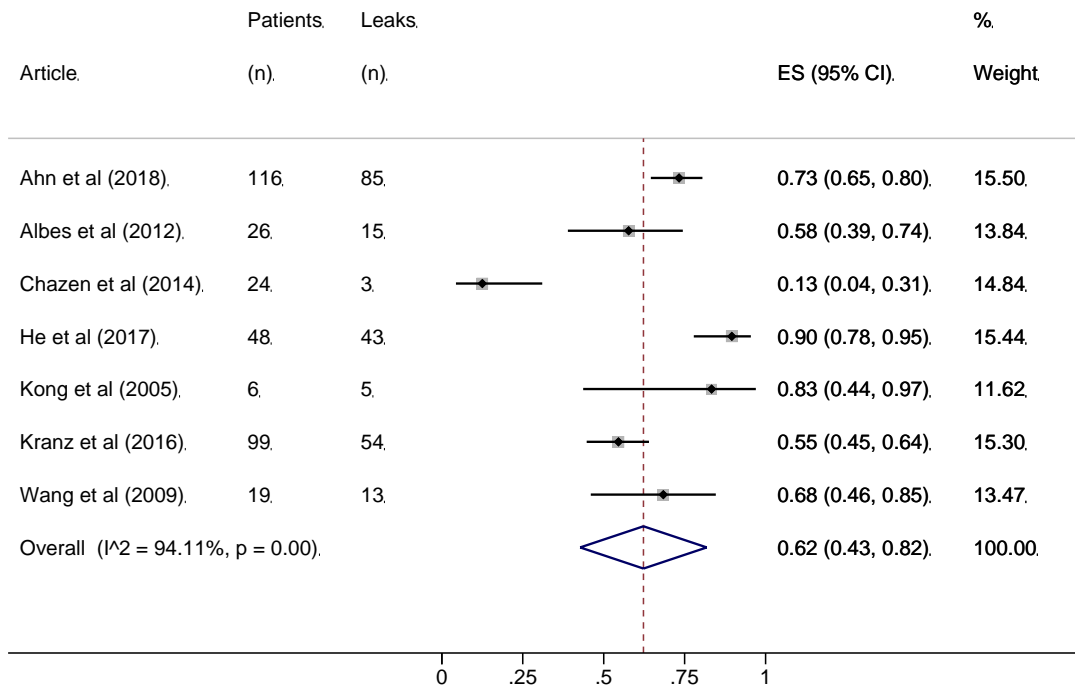



**eFigure 12. Meta-analysis of proportions of positive findings in MR myelography**

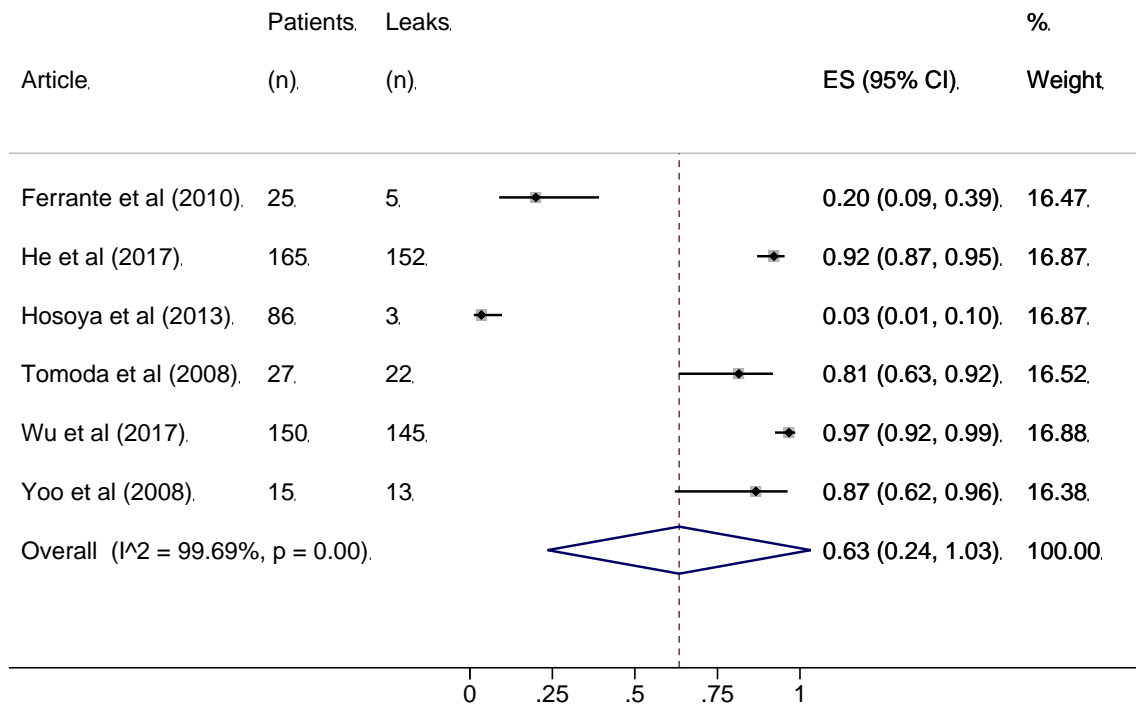

**eFigure 13. Meta-analysis of proportions of positive findings in MR myelography with intrathecal gadolinium**

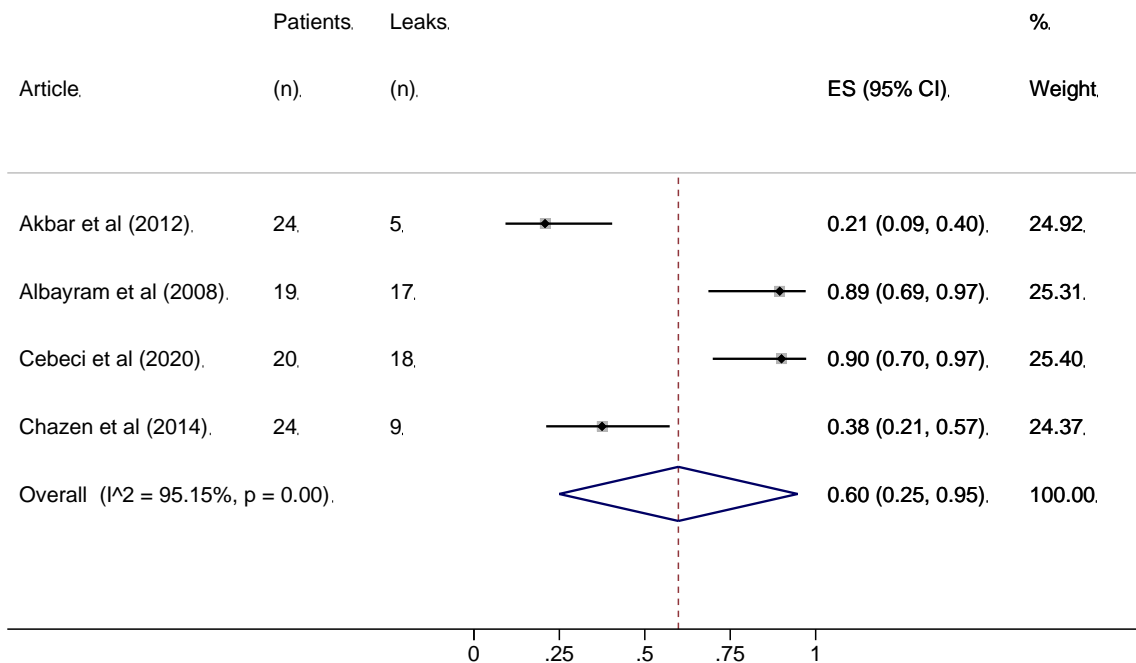

**eFigure 14. Meta-analysis of proportions of positive findings in radionuclide cisternography**

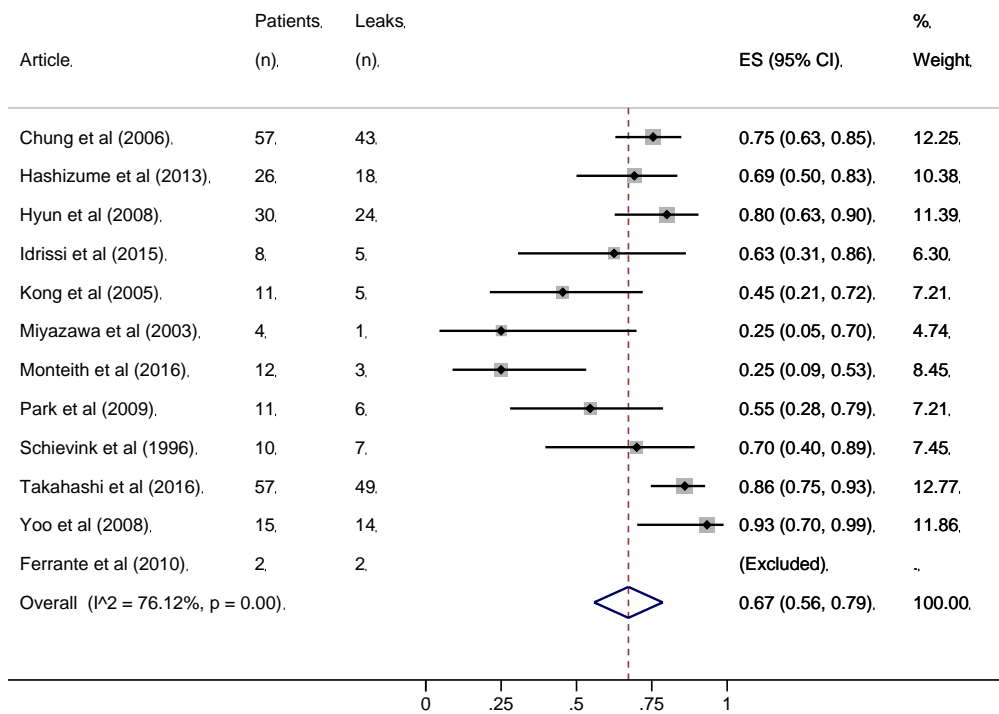

**eFigure 15. Meta-analysis of proportions of positive findings in digital subtraction myelography**

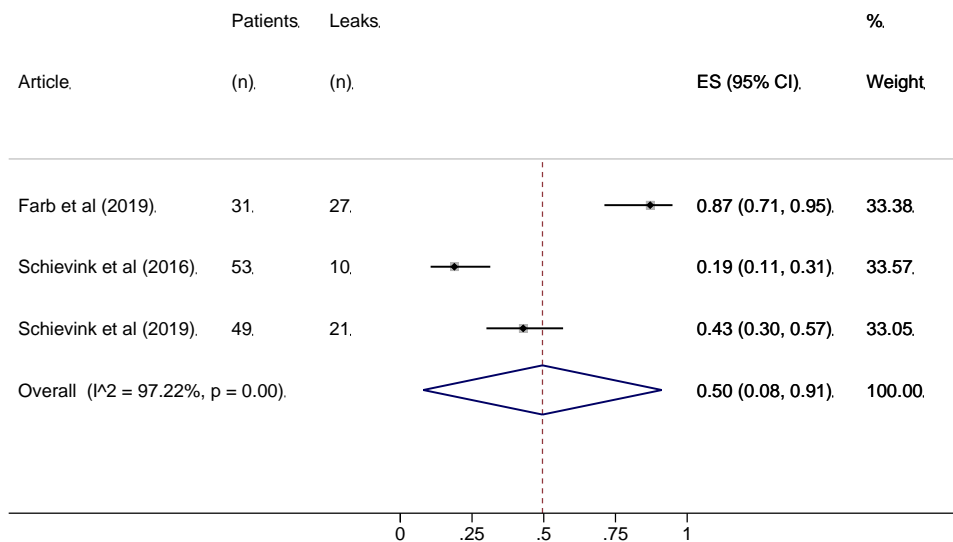

The two studies by Schievink *et al.* have clearly been reported to come from different groups of patients, therefore, they were both eligible for the meta-analysis.

**eFigure 16. Meta-analysis of proportions of positive findings in digital subtraction myelography performed in lateral decubitus position**

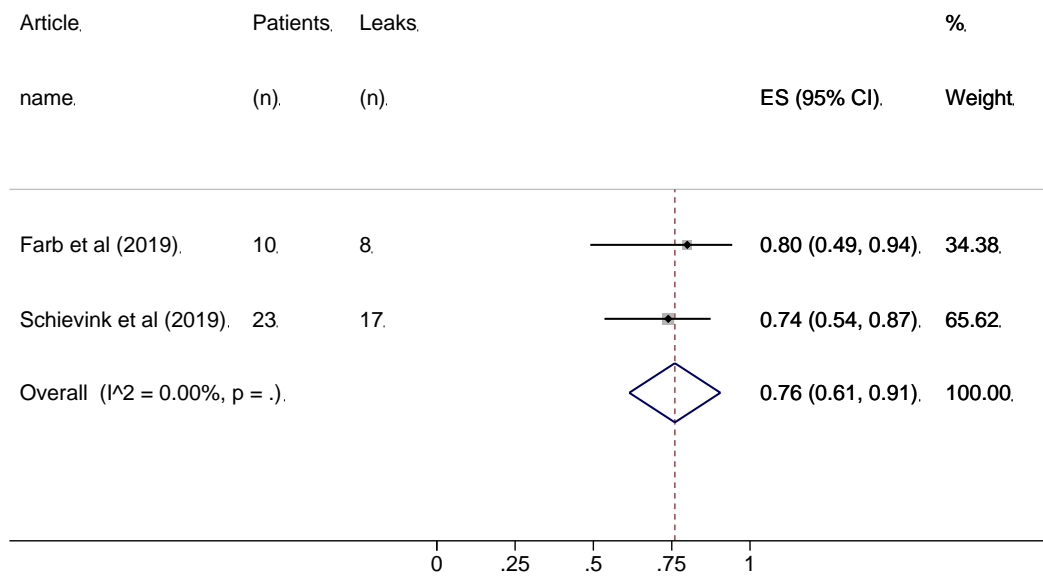

**eFigure 17a. Meta-analysis of proportions of leak location (cervical)**

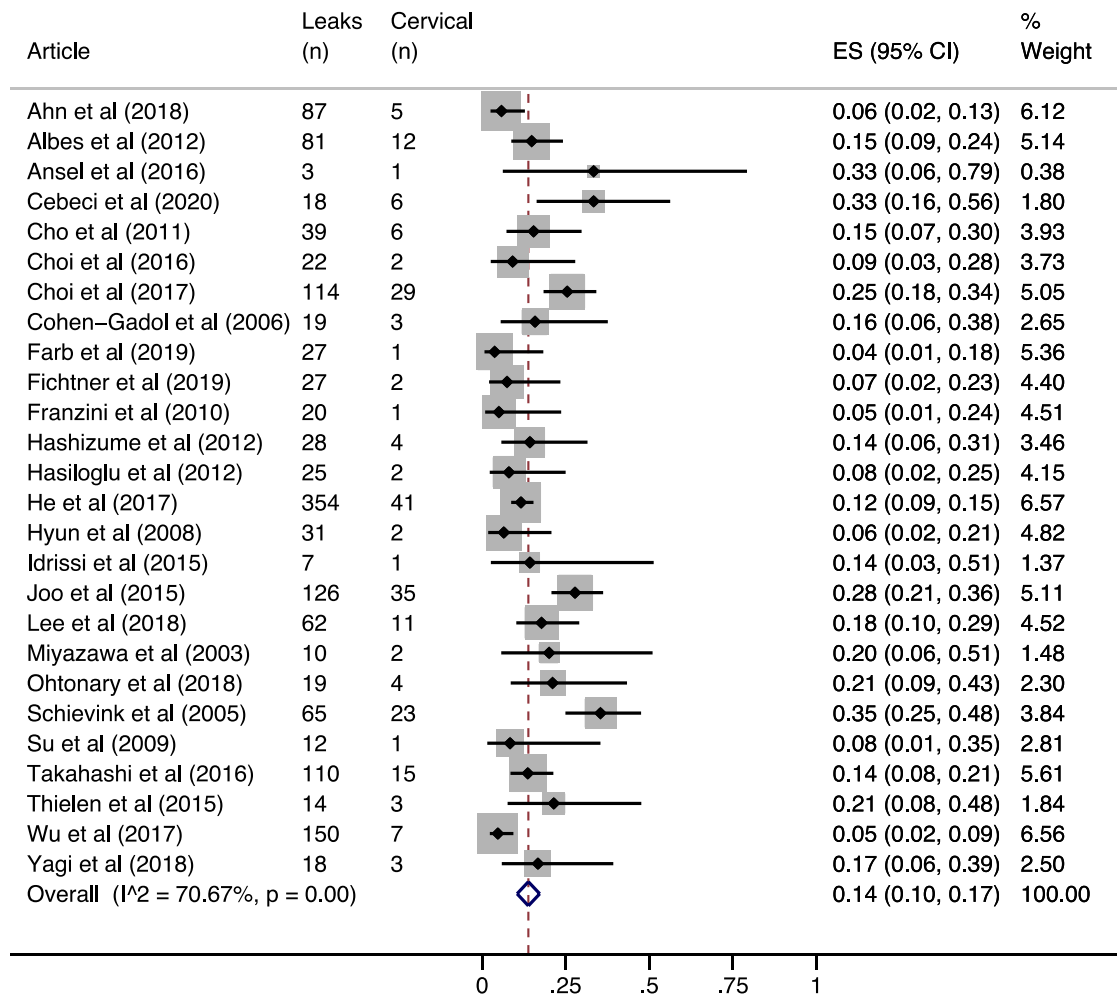

**eFigure 17b. Meta-analysis of proportions of leak location (cervico-thoracic)**

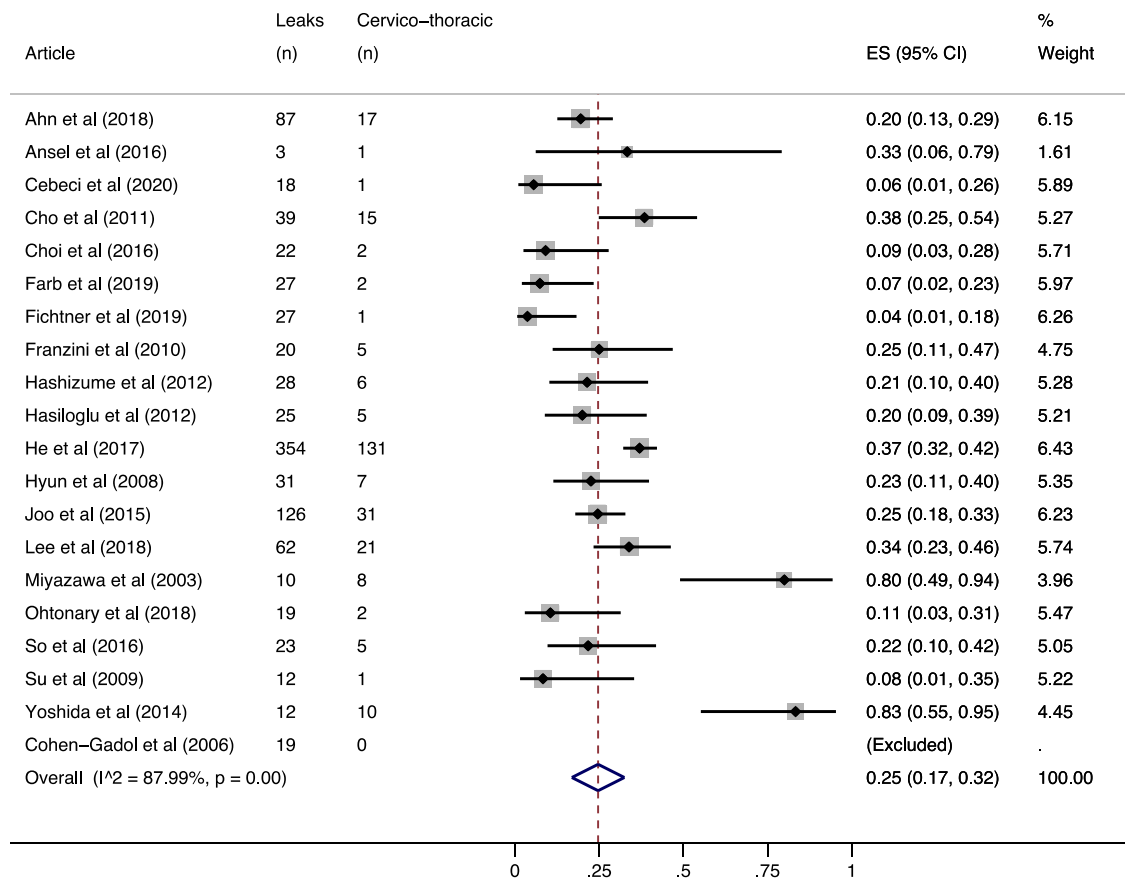

**eFigure 17c. Meta-analysis of proportions of leak location (thoracic)**

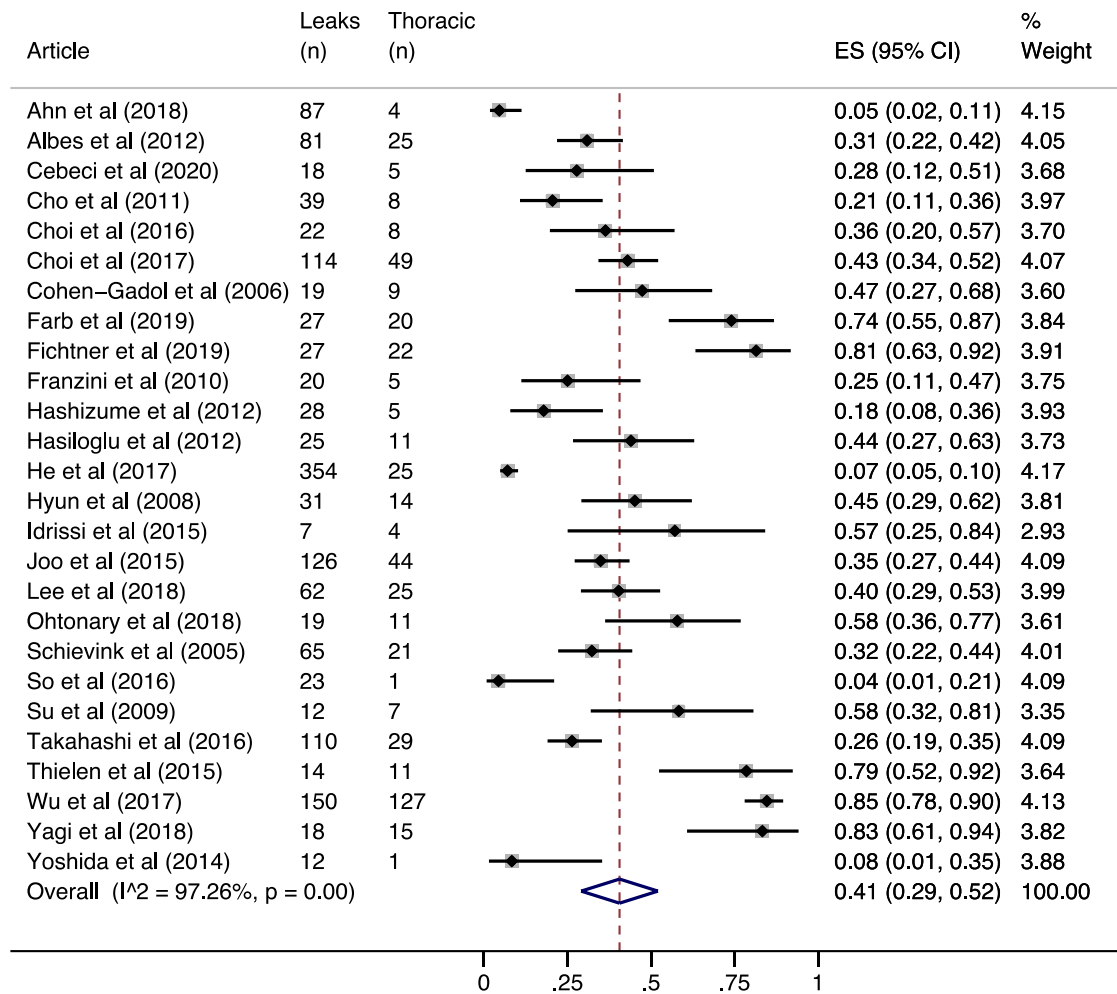

**eFigure 17d. Meta-analysis of proportions of leak location (thoraco-lumbar)**

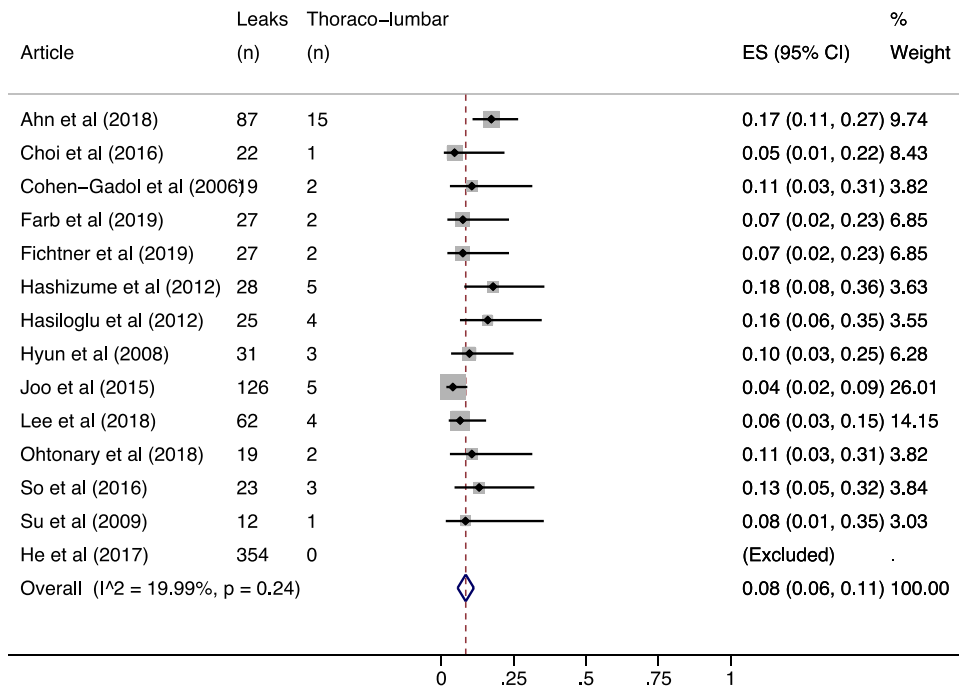

**eFigure 17e. Meta-analysis of proportions of leak location (lumbar)**

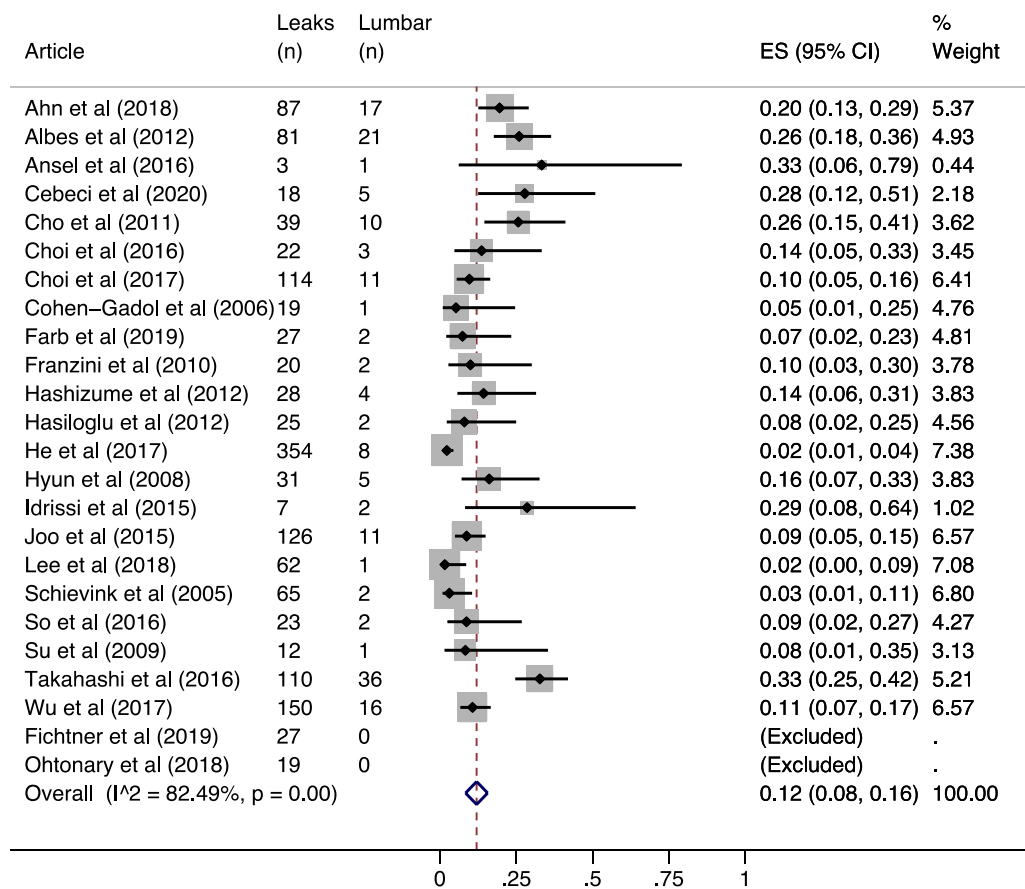

**eFigure 17f. Meta-analysis of proportions of leak location (sacral)**

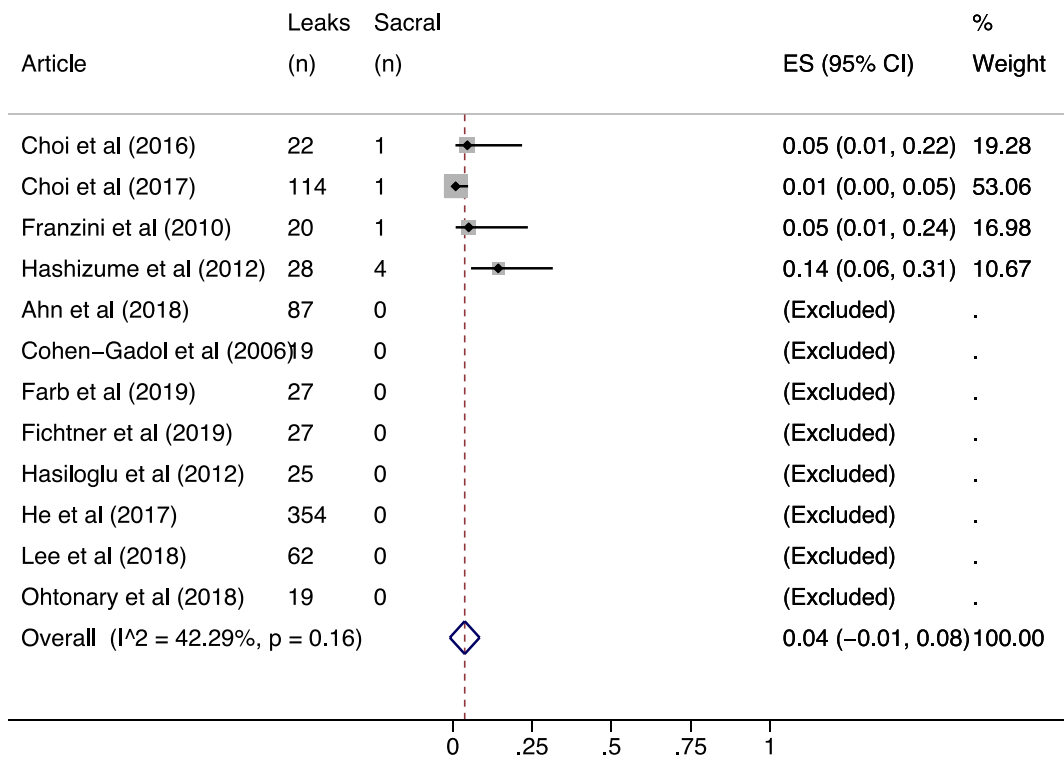

**eFigure 17g. Meta-analysis of proportions of leak location (multiple)**

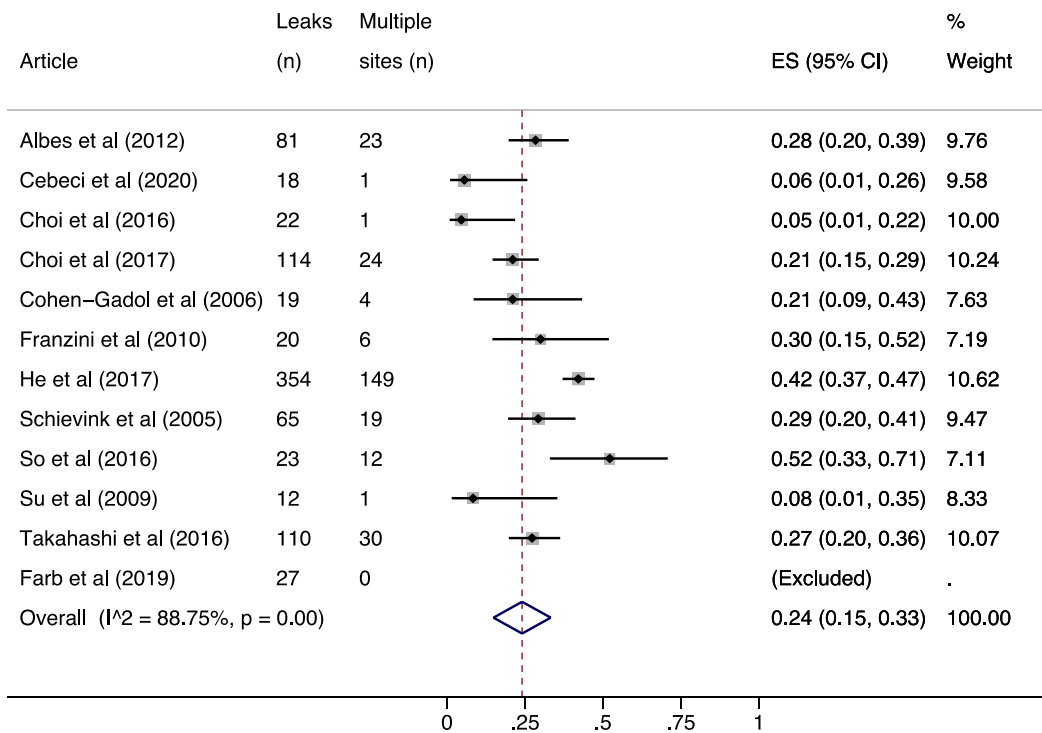



**eFigure 18a. Meta-analysis of proportions of lumbar puncture opening pressure (low)**

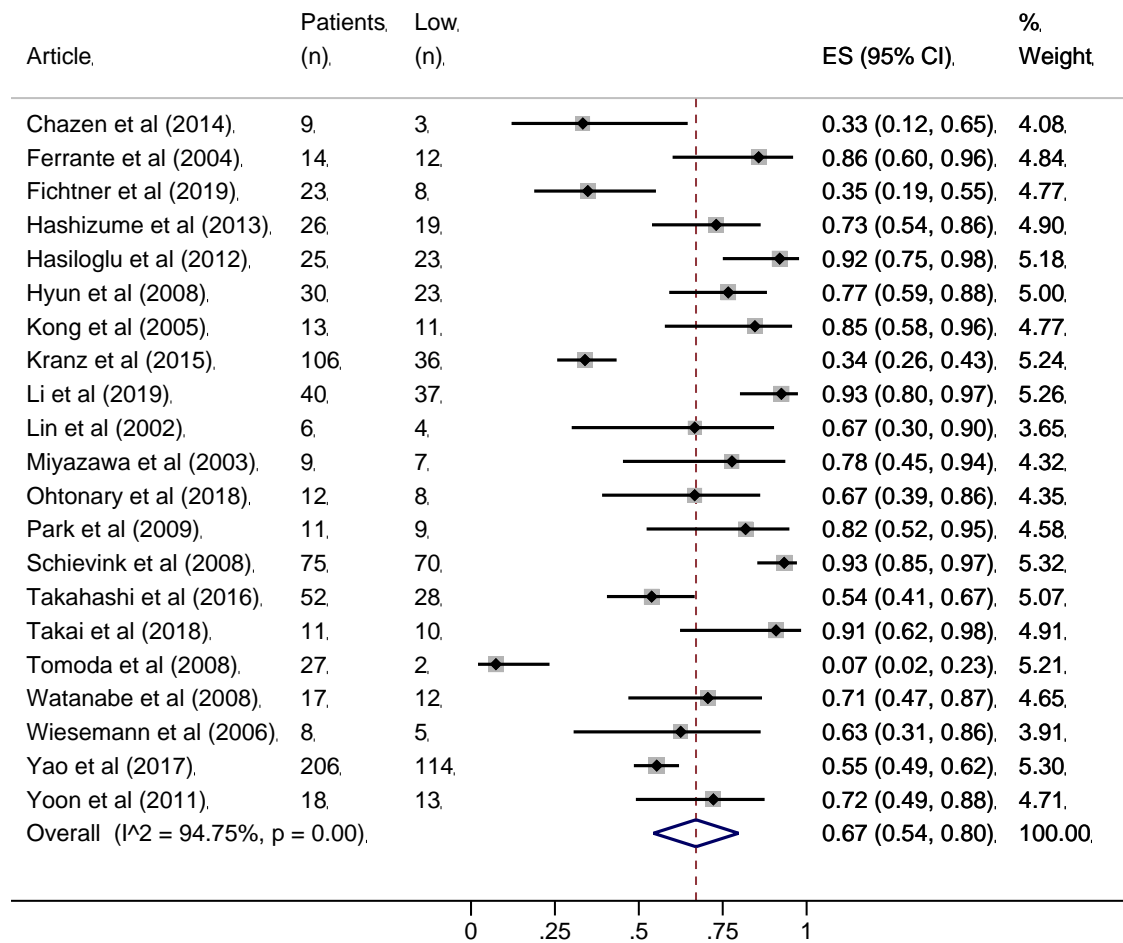

**eFigure 18b. Meta-analysis of proportions of lumbar puncture opening pressure (normal)**

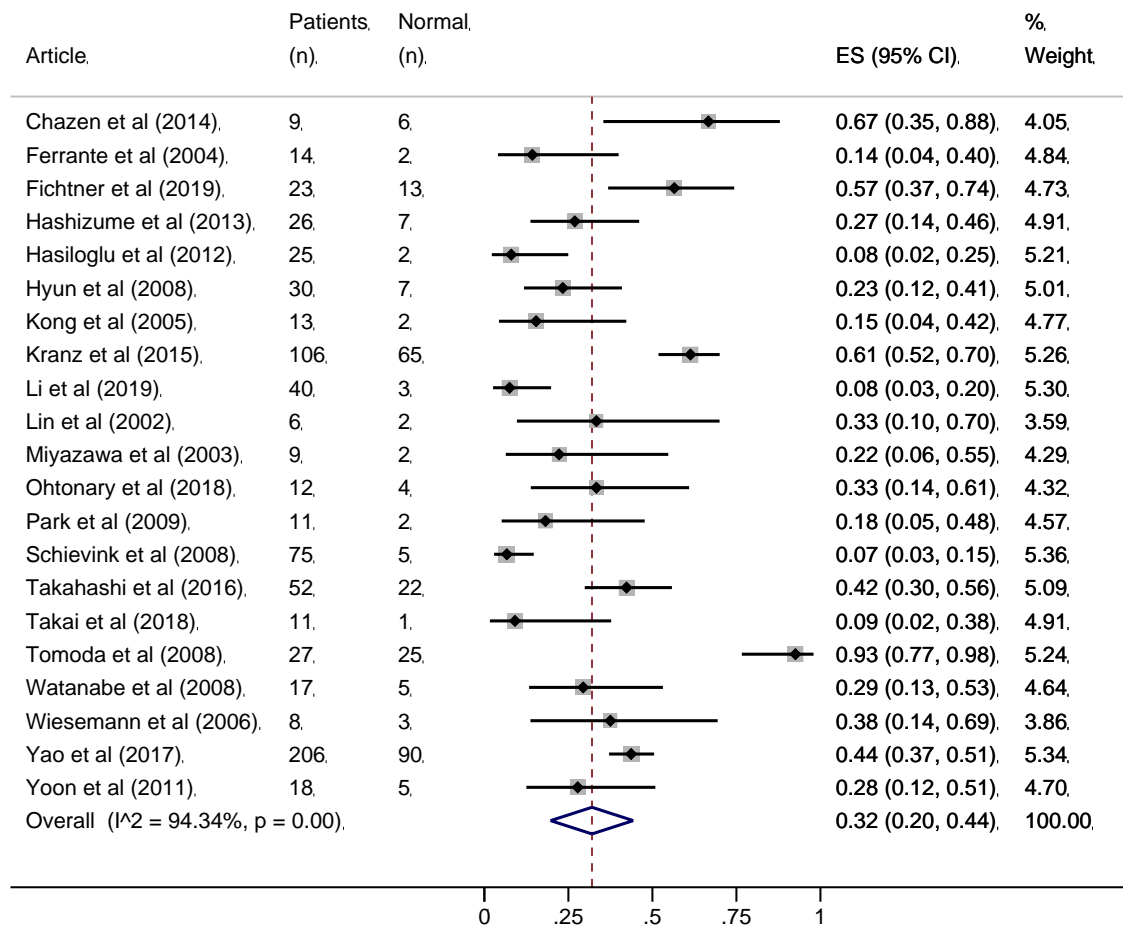

**eFigure 18c. Meta-analysis of proportions of lumbar puncture opening pressure (high)**

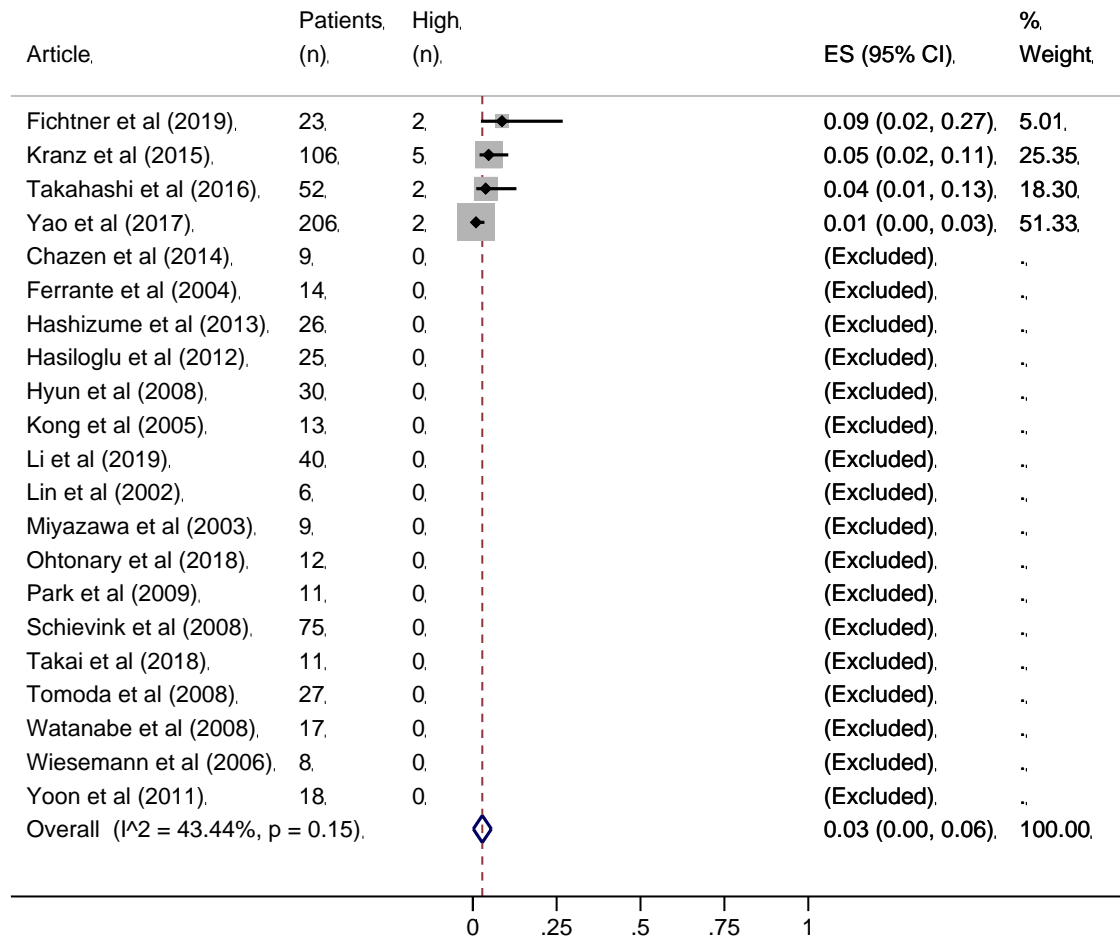

**eFigure 19a. Meta-analysis of proportions of successful conservative treatment**

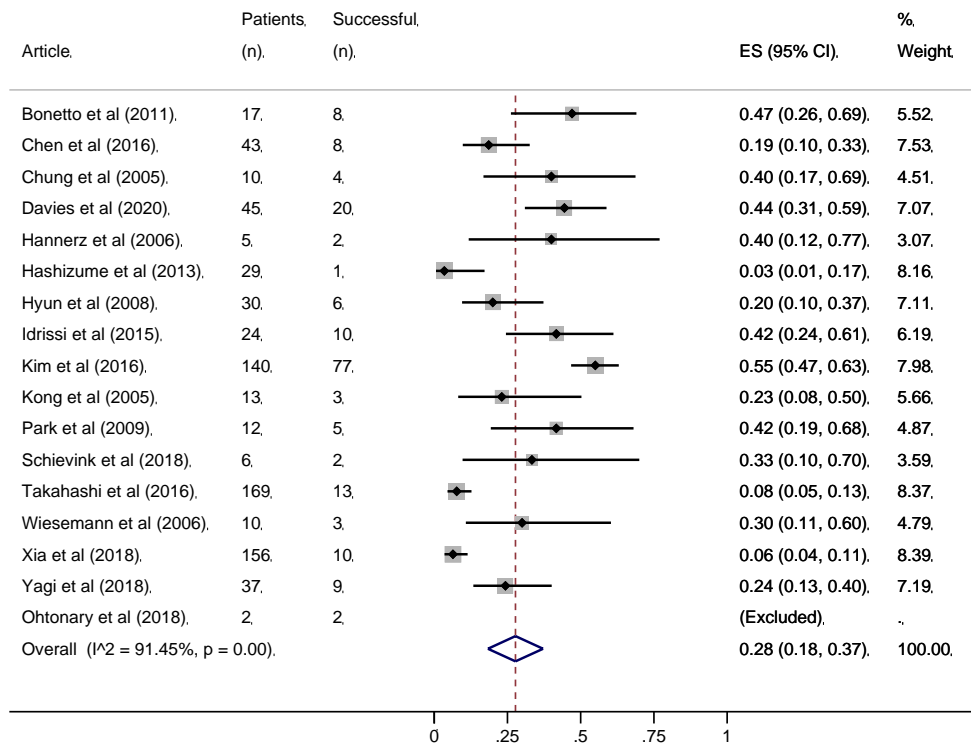

**eFigure 19b. Meta-analysis of proportions of unsuccessful conservative treatment**

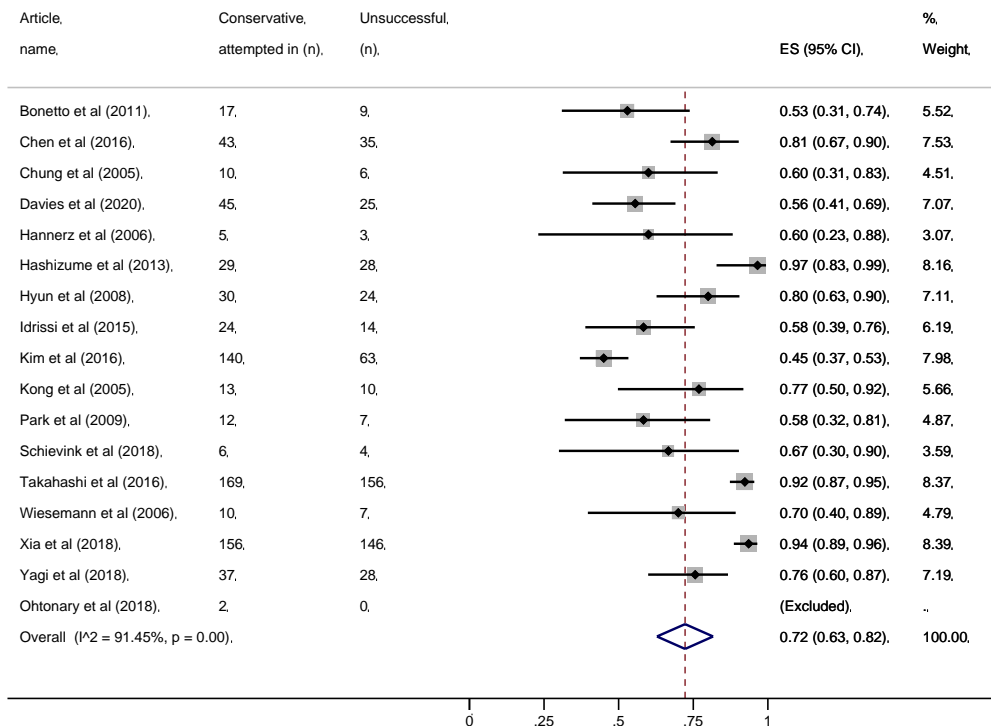

**eFigure 20a. Meta-analysis of proportions of successful first EBP**

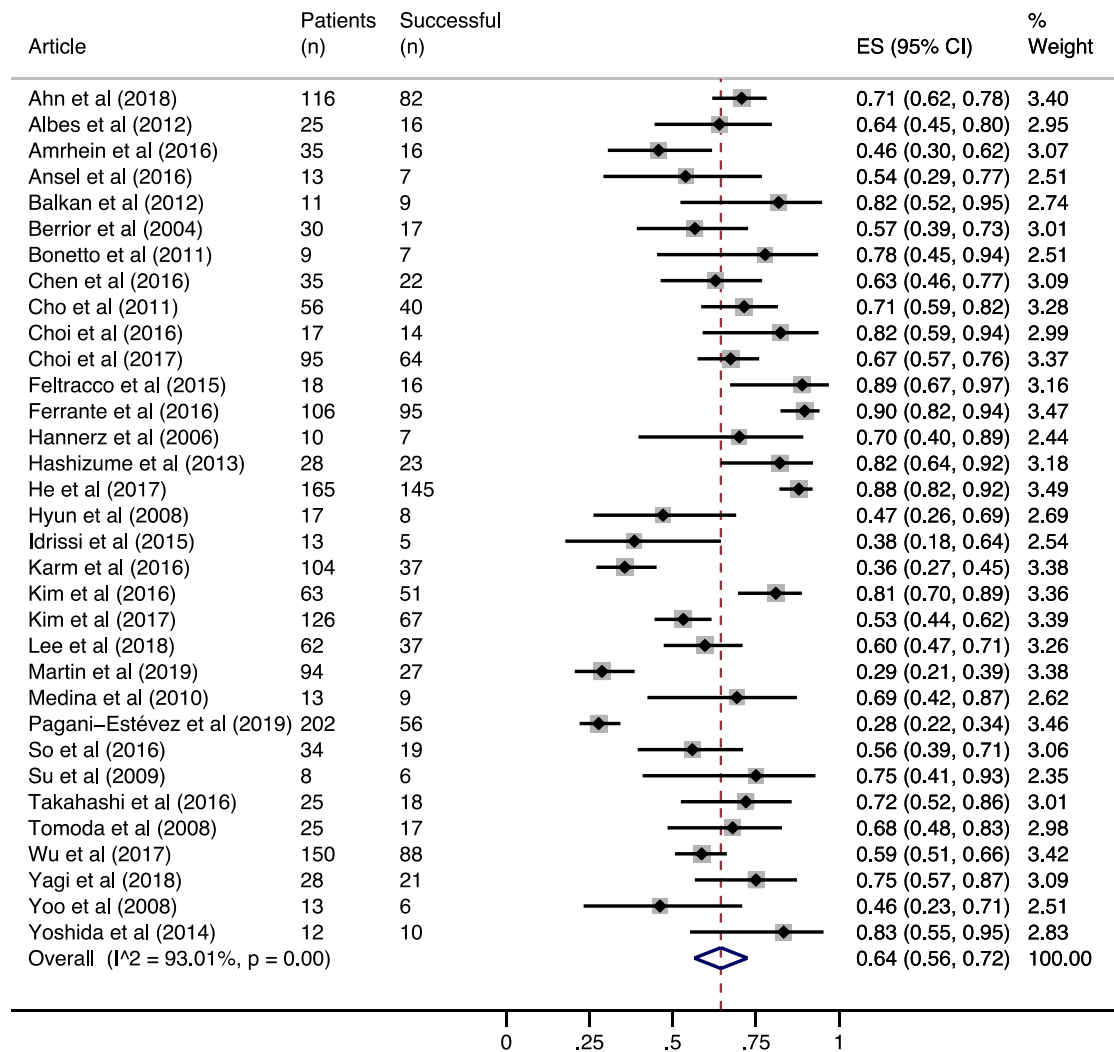

**eFigure 20b. Meta-analysis of proportions of successful nontargeted EBP**

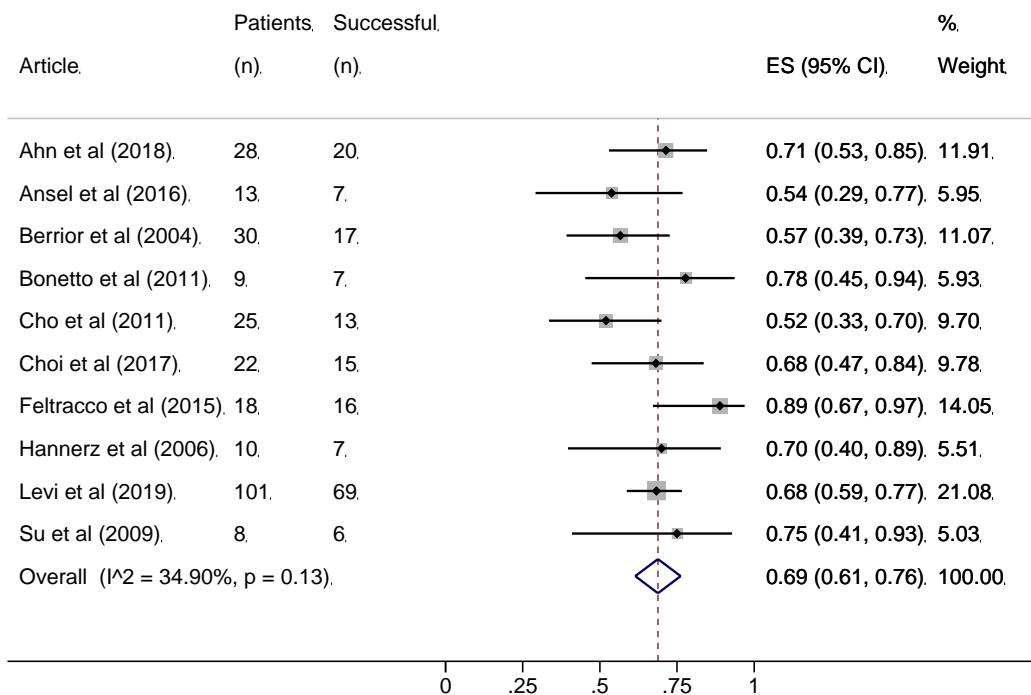

**eFigure 20c. Meta-analysis of proportions of successful targeted EBP**

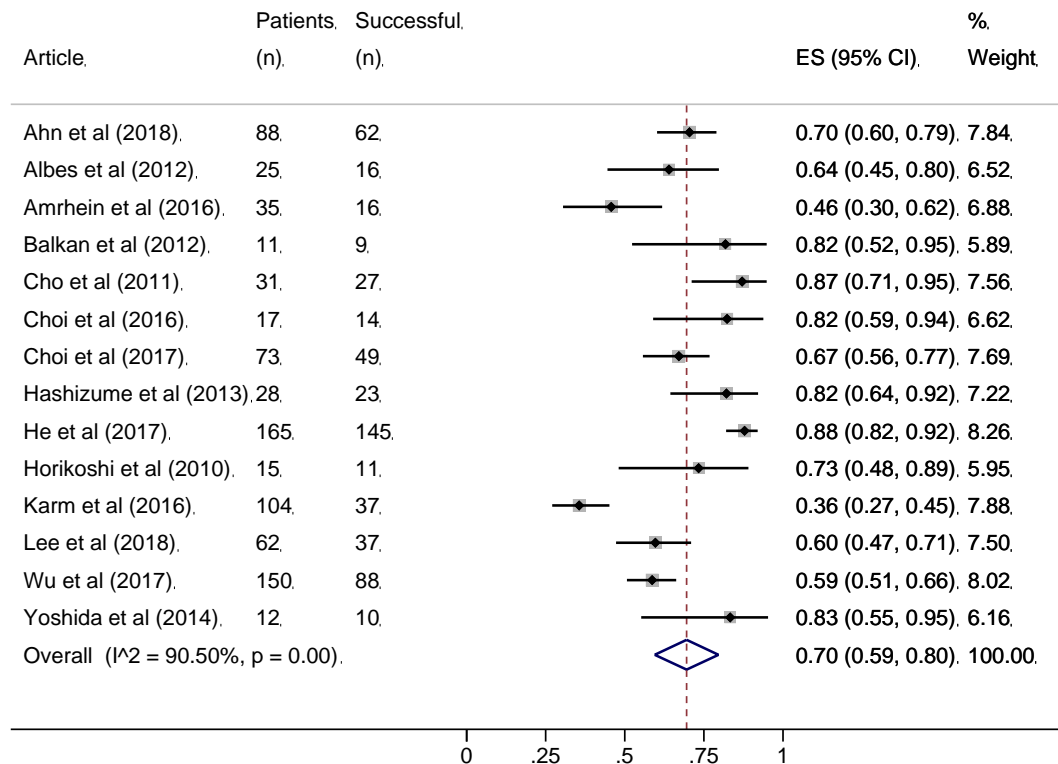

**eFigure 20d. Meta-analysis of proportions of successful small EBP**

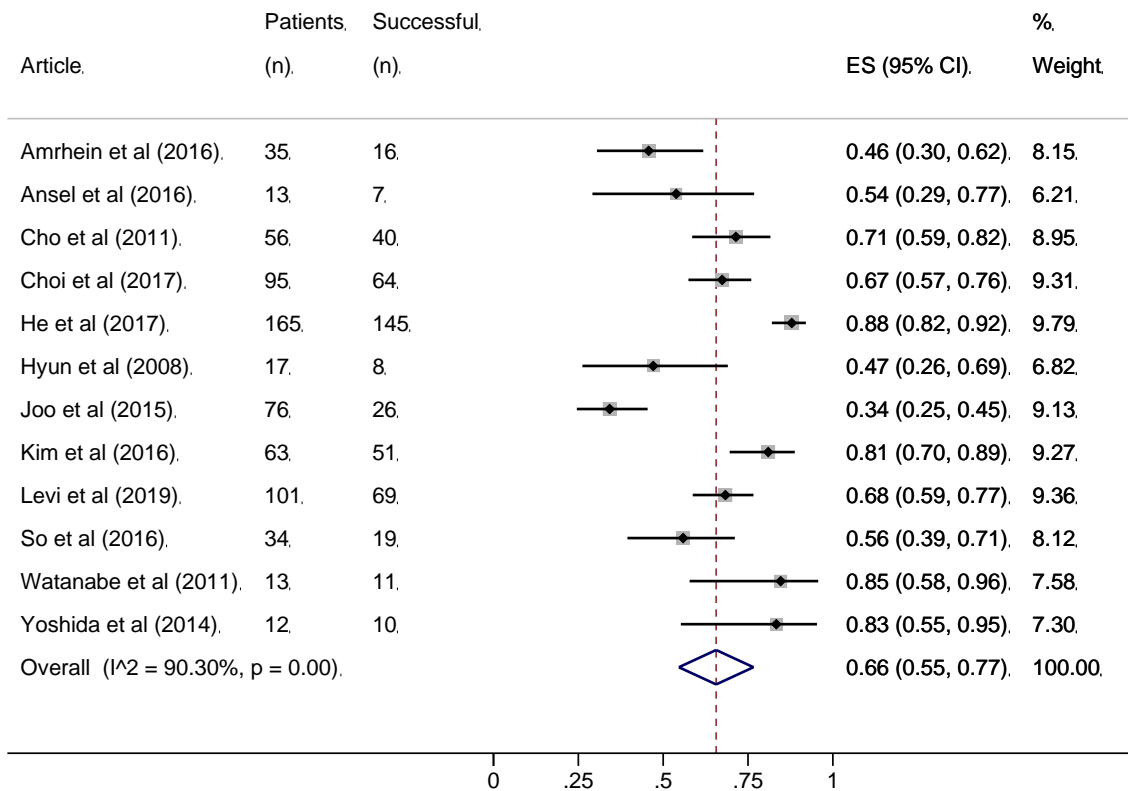

**eFigure 20e. Meta-analysis of proportions of successful large EBP**

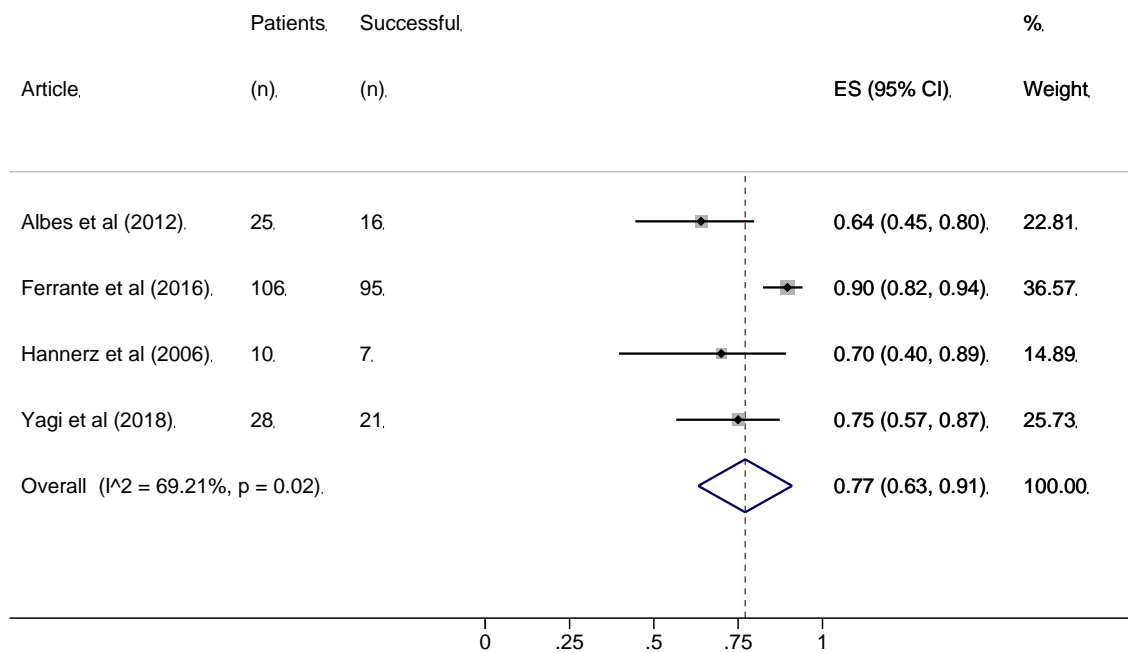

**eFigure 21. Epidural Blood Patches (EBPs) outcomes. Pooled estimates of proportions (95% CI) of successful EBP treatment stratified by EBP technique (non-targeted/targeted, small/large)**

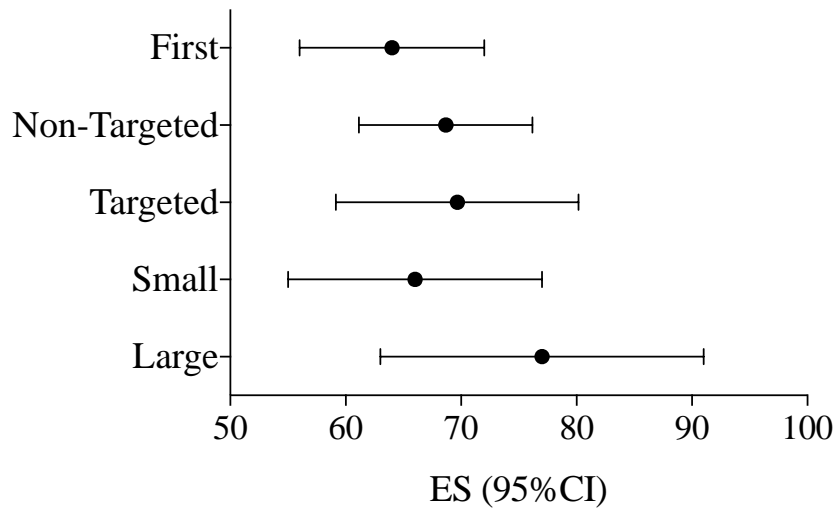



## eReferences

1. Cebeci H, Bilgin C, Candan S, Demir AB, Hakyemez B. Spinal Cerebrospinal Fluid Leakage in Spontaneous Intracranial Hypotension: An Intrathecal Gadolinium Enhanced MR-Myelography Study. *J Belg Soc Radiol.* 2020;104(1):6.
2. Davies MJ, Davies MA, Sharpe R, Cordato D, Schwartz R. Epidural Blood Patch as a Diagnostic and Therapeutic Intervention in Spontaneous Intracranial Hypotension: A Novel Approach to Management. *World Neurosurg.* 2020;137:e242-e50.
3. Wang TY, Karikari IO, Amrhein TJ, Gray L, Kranz PG. Clinical Outcomes Following Surgical Ligation of Cerebrospinal Fluid-Venous Fistula in Patients With Spontaneous Intracranial Hypotension: A Prospective Case Series. *Oper Neurosurg (Hagerstown).* 2020;18(3):239-45.
4. Dobrocky T, Grunder L, Breiding PS, Branca M, Limacher A, Mosimann PJ, et al. Assessing Spinal Cerebrospinal Fluid Leaks in Spontaneous Intracranial Hypotension With a Scoring System Based on Brain Magnetic Resonance Imaging Findings. *JAMA Neurol.* 2019;76(5):580-7.
5. Li C, Raza HK, Chansysouphanthong T, Zu J, Cui G. A clinical analysis on 40 cases of spontaneous intracranial hypotension syndrome. *Somatosens Mot Res.* 2019;36(1):24-30.
6. Levi V, Di Laurenzio NE, Franzini A, Tramacere I, Erbetta A, Chiapparini L, et al. Lumbar epidural blood patch: effectiveness on orthostatic headache and MRI predictive factors in 101 consecutive patients affected by spontaneous intracranial hypotension. *J Neurosurg.* 2019:1-9.

7. Kim SC, Ryoo I, Sun HY, Park SW. MRI Findings of Spontaneous Intracranial Hypotension: Usefulness of Straight Sinus Distention. *AJR Am J Roentgenol.* 2019;1-7.
8. Schievink WI, Maya MM, Jean-Pierre S, Moser FG, Nuno M, Pressman BD. Rebound high-pressure headache after treatment of spontaneous intracranial hypotension: MRV study. *Neurol Clin Pract.* 2019;9(2):93-100.
9. Schievink WI, Maya MM, Moser FG, Prasad RS, Cruz RB, Nuno M, et al. Lateral decubitus digital subtraction myelography to identify spinal CSF-venous fistulas in spontaneous intracranial hypotension. *J Neurosurg Spine.* 2019:1-4.
10. Pagani-Estevez GL, Cutsforth-Gregory JK, Morris JM, Mokri B, Piepgras DG, Mauck WD, et al. Procedural predictors of epidural blood patch efficacy in spontaneous intracranial hypotension. *Reg Anesth Pain Med.* 2019.
11. Fichtner J, Ulrich CT, Fung C, Cipriani D, Gralla J, Piechowiak EI, et al. Sonography of the optic nerve sheath diameter before and after microsurgical closure of a dural CSF fistula in patients with spontaneous intracranial hypotension - a consecutive cohort study. *Cephalalgia.* 2019;39(2):306-15.
12. Martin R, Louy C, Babu V, Jiang Y, Far A, Schievink WI. A two-level large-volume epidural blood patch protocol for spontaneous intracranial hypotension: retrospective analysis of risk benefit. *Reg Anesth Pain Med.* 2020;45:32-7.
13. Kinsman KA, Verdoorn JT, Luetmer PH, Clark MS, Diehn FE. Renal Contrast on CT Myelography: Diagnostic Value in Patients with Spontaneous Intracranial Hypotension. *AJNR Am J Neuroradiol.* 2019;40(2):376-81.
14. Farb RI, Nicholson PJ, Peng PW, Massicotte EM, Lay C, Krings T, et al. Spontaneous Intracranial Hypotension: A Systematic Imaging Approach for CSF Leak Localization

- and Management Based on MRI and Digital Subtraction Myelography. *AJNR Am J Neuroradiol.* 2019;40(4):745-53.
15. Griffin AS, Lu L, Peacock S, Gray L, Kranz PG, Amrhein TJ. CSF volume provocation maneuvers during lumbar puncture as a possible predictive tool for diagnosing spontaneous intracranial hypotension. *Clin Neurol Neurosurg.* 2019;186:105552.
  16. Ohtonari T, Ota S, Himeno T, Nishihara N, Sato M, Tanaka A. Excellent Outcomes of Large-Volume Epidural Blood Patch Using an Intravenous Catheter in 15 Consecutive Cases with Cerebrospinal Fluid Leak. *World Neurosurg.* 2018;118:e276-e82.
  17. Murakami Y, Takahashi K, Hoshi K, Ito H, Kanno M, Saito K, et al. Spontaneous intracranial hypotension is diagnosed by a combination of lipocalin-type prostaglandin D synthase and brain-type transferrin in cerebrospinal fluid. *Biochim Biophys Acta Gen Subj.* 2018;1862(8):1835-42.
  18. Lee JY, Lee MJ, Park HJ, Park JH, Jeong HJ, Oh MS, et al. Clinical effect of the proximity of epidural blood patch injection to the leakage site in spontaneous intracranial hypotension. *Br J Neurosurg.* 2018;32(6):671-3.
  19. Schievink WI, Maya MM, Barnard ZR, Moser FG, Jean-Pierre S, Waxman AD, et al. Behavioral Variant Frontotemporal Dementia as a Serious Complication of Spontaneous Intracranial Hypotension. *Oper Neurosurg (Hagerstown).* 2018;15(5):505-15.
  20. Xia P, Zhang SR, Zhou ZJ, Shao YQ, Hu XY. Benign paroxysmal positional vertigo in spontaneous intracranial hypotension. *Neurol Res.* 2018;40(10):868-73.

21. Ahn C, Lee E, Lee JW, Chee CG, Kang Y, Kang HS. Two-site blind epidural blood patch versus targeted epidural blood patch in spontaneous intracranial hypotension. *J Clin Neurosci*. 2019;62:147-54.
22. Yagi T, Horikoshi T, Senbokuya N, Murayama H, Kinouchi H. Distribution Patterns of Spinal Epidural Fluid in Patients with Spontaneous Intracranial Hypotension Syndrome. *Neurol Med Chir (Tokyo)*. 2018;58(5):212-8.
23. Tsai YH, Chen HC, Tung H, Wu YY, Chen HM, Pan KJ, et al. Noninvasive assessment of intracranial elastance and pressure in spontaneous intracranial hypotension by MRI. *J Magn Reson Imaging*. 2018;48(5):1255-63.
24. Takai K, Niimura M, Hongo H, Umekawa M, Teranishi A, Kayahara T, et al. Disturbed Consciousness and Coma: Diagnosis and Management of Intracranial Hypotension Caused by a Spinal Cerebrospinal Fluid Leak. *World Neurosurg*. 2019;121:e700-e11.
25. Dobrocky T, Mosimann PJ, Zibold F, Mordasini P, Raabe A, Ulrich CT, et al. Cryptogenic Cerebrospinal Fluid Leaks in Spontaneous Intracranial Hypotension: Role of Dynamic CT Myelography. *Radiology*. 2018;289(3):766-72.
26. Clark MS, Diehn FE, Verdoorn JT, Lehman VT, Liebo GB, Morris JM, et al. Prevalence of hyperdense paraspinous vein sign in patients with spontaneous intracranial hypotension without dural CSF leak on standard CT myelography. *Diagn Interv Radiol*. 2018;24(1):54-9.
27. Ferrante E, Rubino F, Beretta F, Regna-Gladin C, Ferrante MM. Treatment and outcome of subdural hematoma in patients with spontaneous intracranial hypotension: a report of 35 cases. *Acta Neurol Belg*. 2018;118(1):61-70.

28. Beck J, Raabe A, Schievink WI, Fung C, Gralla J, Piechowiak E, et al. Posterior Approach and Spinal Cord Release for 360 degrees Repair of Dural Defects in Spontaneous Intracranial Hypotension. *Neurosurgery*. 2019;84(6):E345-E51.
29. Schievink WI, Maya MM, Moser FG, Jean-Pierre S, Nuno M. Coma: A serious complication of spontaneous intracranial hypotension. *Neurology*. 2018;90(19):e1638-e45.
30. Yao LL, Hu XY. Factors affecting cerebrospinal fluid opening pressure in patients with spontaneous intracranial hypotension. *J Zhejiang Univ Sci B*. 2017;18(7):577-85.
31. Wu JW, Hseu SS, Fuh JL, Lirng JF, Wang YF, Chen WT, et al. Factors predicting response to the first epidural blood patch in spontaneous intracranial hypotension. *Brain*. 2017;140(2):344-52.
32. Beck J, Fung C, Ulrich CT, Fiechter M, Fichtner J, Mattle HP, et al. Cerebrospinal fluid outflow resistance as a diagnostic marker of spontaneous cerebrospinal fluid leakage. *J Neurosurg Spine*. 2017;27(2):227-34.
33. He FF, Li L, Liu MJ, Zhong TD, Zhang QW, Fang XM. Targeted Epidural Blood Patch Treatment for Refractory Spontaneous Intracranial Hypotension in China. *J Neurol Surg B Skull Base*. 2018;79(3):217-23.
34. Choi H, Lee MJ, Choi HA, Cha J, Chung CS. Intracranial structural alteration predicts treatment outcome in patients with spontaneous intracranial hypotension. *Cephalalgia*. 2018;38(2):323-31.
35. Kim YJ, Cho HY, Seo DW, Sohn CH, Ahn S, Lee YS, et al. Misdiagnosis of Spontaneous Intracranial Hypotension as a Risk Factor for Subdural Hematoma. *Headache*. 2017;57(10):1593-600.

36. Kranz PG, Amrhein TJ, Gray L. CSF Venous Fistulas in Spontaneous Intracranial Hypotension: Imaging Characteristics on Dynamic and CT Myelography. *AJR Am J Roentgenol.* 2017;209(6):1360-6.
37. Chen CH, Chen JH, Chen HC, Chai JW, Chen PL, Chen CC. Patterns of cerebrospinal fluid (CSF) distribution in patients with spontaneous intracranial hypotension: Assessed with magnetic resonance myelography. *J Chin Med Assoc.* 2017;80(2):109-16.
38. Chen HC, Chen PL, Tsai YH, Chen CH, Chen CC, Chai JW. Quantitative Measurement of CSF in Patients with Spontaneous Intracranial Hypotension. *AJNR Am J Neuroradiol.* 2017;38(5):1061-7.
39. Chen YC, Wang YF, Li JY, Chen SP, Lirng JF, Hseu SS, et al. Treatment and prognosis of subdural hematoma in patients with spontaneous intracranial hypotension. *Cephalalgia.* 2016;36(3):225-31.
40. So Y, Park JM, Lee P, Kim CL, Lee C, Kim JH. Epidural blood patch for the treatment of spontaneous and iatrogenic orthostatic headache. *Pain Physician.* 2016;19:E1115-E22.
41. Amemiya S, Takahashi K, Mima T, Yoshioka N, Miki S, Ohtomo K. Reversible alterations of the neuronal activity in spontaneous intracranial hypotension. *Cephalalgia.* 2016;36(2):162-71.
42. Kranz PG, Tanpitukpongse TP, Choudhury KR, Amrhein TJ, Gray L. Imaging Signs in Spontaneous Intracranial Hypotension: Prevalence and Relationship to CSF Pressure. *AJNR Am J Neuroradiol.* 2016;37(7):1374-8.
43. Schievink WI, Moser FG, Maya MM, Prasad RS. Digital subtraction myelography for the identification of spontaneous spinal CSF-venous fistulas. *J Neurosurg Spine.* 2016;24(6):960-4.

44. Ferrante E, Rubino F, Mongelli M, Arpino I. Subarachnoidal blood spread following epidural blood patch given to treat spontaneous intracranial hypotension: Can it cause neurological complications? *Clin Neurol Neurosurg*. 2016;140:43-6.
45. Amrhein TJ, Befera NT, Gray L, Kranz PG. CT Fluoroscopy-Guided Blood Patching of Ventral CSF Leaks by Direct Needle Placement in the Ventral Epidural Space Using a Transforaminal Approach. *AJNR Am J Neuroradiol*. 2016;37(10):1951-6.
46. Fichtner J, Ulrich CT, Fung C, Knuppel C, Veitweber M, Jilch A, et al. Management of spontaneous intracranial hypotension - Transorbital ultrasound as discriminator. *J Neurol Neurosurg Psychiatry*. 2016;87(6):650-5.
47. Monteith TS, Kralik SF, Dillon WP, Hawkins RA, Goadsby PJ. The utility of radioisotope cisternography in low CSF/volume syndromes compared to myelography. *Cephalalgia*. 2016;36(13):1291-5.
48. Schievink WI, Maya MM, Jean-Pierre S, Nuno M, Prasad RS, Moser FG. A classification system of spontaneous spinal CSF leaks. *Neurology*. 2016;87:673-9.
49. Hori S, Taoka T, Miyasaka T, Ochi T, Sakamoto M, Wada T, et al. Dural Thickening of the Internal Auditory Canal in Patients With Spontaneous Intracranial Hypotension Syndrome. *J Comput Assist Tomogr*. 2016;40(2):297-300.
50. Karm MH, Choi JH, Kim D, Park JY, Yun HJ, Suh JH. Predictors of the Treatment Response of Spontaneous Intracranial Hypotension to an Epidural Blood Patch. *Medicine (Baltimore)*. 2016;95(18):e3578.
51. Ansel S, Rae A, Tyagi A. Efficacy of epidural blood patches for spontaneous low-pressure headaches: a case series. *J R Coll Physicians Edinb*. 2016;46(4):234-7.
52. Takahashi K, Mima T, Akiba Y. Chronic Subdural Hematoma Associated with Spontaneous Intracranial Hypotension: Therapeutic Strategies and Outcomes of 55 Cases. *Neurol Med Chir (Tokyo)*. 2016;56(2):69-76.

53. Capizzano AA, Lai L, Kim J, Rizzo M, Gray L, Smoot MK, et al. Atypical Presentations of Intracranial Hypotension: Comparison with Classic Spontaneous Intracranial Hypotension. *AJNR Am J Neuroradiol.* 2016;37(7):1256-61.
54. Tanaka Y, Tosaka M, Fujimaki H, Honda F, Yoshimoto Y. Sex- and Age-Related Differences in the Clinical and Neuroimaging Characteristics of Patients With Spontaneous Intracranial Hypotension: A Records Review. *Headache.* 2016;56(8):1310-6.
55. Kim WJ, Shin HY, Kim YC, Moon JY. Clinical association between brain MRI findings with epidural blood patch in spontaneous intracranial hypotension. *J Neurosurg Anesthesiol.* 2016;28(2):147-52.
56. Choi SW, Ahn JM, Lee JW, Park KS, Kang HS. The usefulness of MDCT-myelography for patients with spontaneous intracranial hypotension. *Springerplus.* 2016;5:424.
57. Kranz PG, Amrhein TJ, Choudhury KR, Tanpitukpongse TP, Gray L. Time-Dependent Changes in Dural Enhancement Associated With Spontaneous Intracranial Hypotension. *AJR Am J Roentgenol.* 2016;207(6):1283-7.
58. Ferrante E, Olgiati E, Sangalli V, Rubino F. Early pain relief from orthostatic headache and hearing changes in spontaneous intracranial hypotension after epidural blood patch. *Acta Neurol Belg.* 2016;116(4):503-8.
59. Beck J, Ulrich CT, Fung C, Fichtner J, Seidel K, Fiechter M, et al. Diskogenic microspurs as a major cause of intractable spontaneous intracranial hypotension. *Neurology.* 2016;87:1220-6.
60. Verdoorn JT, Luetmer PH, Carr CM, Lane JI, Lehman VT, Morris JM, et al. Predicting High-Flow Spinal CSF Leaks in Spontaneous Intracranial Hypotension



Using a Spinal MRI-Based Algorithm: Have Repeat CT Myelograms Been Reduced?  
*AJNR Am J Neuroradiol.* 2016;37(1):185-8.

61. Wan Y, Xie J, Xie D, Xue Z, Wang Y, Yang S. Clinical characteristics of 15 cases of chronic subdural hematomas due to spontaneous intracranial hypotension with spinal cerebrospinal fluid leak. *Acta Neurol Belg.* 2016;116(4):509-12.
62. Kranz PG, Tanpitukpongse TP, Choudhury KR, Amrhein TJ, Gray L. How common is normal cerebrospinal fluid pressure in spontaneous intracranial hypotension? *Cephalalgia.* 2016;36(13):1209-17.
63. Idrissi AL, Lacour JC, Klein O, Schmitt E, Ducrocq X, Richard S. Spontaneous Intracranial Hypotension: Characteristics of the Serious Form in a Series of 24 Patients. *World Neurosurg.* 2015;84(6):1613-20.
64. Thielen KR, Sillery JC, Morris JM, Hoxworth JM, Diehn FE, Wald JT, et al. Ultrafast dynamic computed tomography myelography for the precise identification of high-flow cerebrospinal fluid leaks caused by spiculated spinal osteophytes. *J Neurosurg Spine.* 2015;22(3):324-31.
65. Joo EY, Hwang BY, Kong YG, Lee JH, Hwang BS, Suh JH. Retrospective study of epidural blood patch use for spontaneous intracranial hypotension. *Reg Anesth Pain Med.* 2015;40(1):58-61.
66. Feltracco P, Galligioni H, Barbieri S, Ori C. Thoracic epidural blood patches in the treatment of spontaneous intracranial hypotension: a retrospective case series. *Pain Physician.* 2015;18:343-8.
67. Schievink WI, Maya MM, Chu RM, Moser F. False localizing sign of cervico-thoracic CSF leak in spontaneous intracranial hypotension. 2015;84:2445-8.

68. Schievink WI, Nuno M, Rozen TD, Maya MM, Mamelak AN, Carmichael J, et al. Hyperprolactinemia due to spontaneous intracranial hypotension. *J Neurosurg*. 2015;122(5):1020-5.
69. Xia P, Hu XY, Wang J, Hu BB, Xu QL, Zhou ZJ, et al. Risk factors for subdural haematoma in patients with spontaneous intracranial hypotension. *PLoS One*. 2015;10(4):e0123616.
70. Yoshida H, Takai K, Taniguchi M. Leakage detection on CT myelography for targeted epidural blood patch in spontaneous cerebrospinal fluid leaks: calcified or ossified spinal lesions ventral to the thecal sac. *J Neurosurg Spine*. 2014;21(3):432-41.
71. Chazen JL, Talbott JF, Lantos JE, Dillon WP. MR myelography for identification of spinal CSF leak in spontaneous intracranial hypotension. *AJNR Am J Neuroradiol*. 2014;35(10):2007-12.
72. Pimienta AL, Rimoin DL, Pariani M, Schievink WI, Reinstein E. Echocardiographic findings in patients with spontaneous CSF leak. *J Neurol*. 2014;261(10):1957-60.
73. Schievink WI, Goseland A, Cunneen S. Bariatric surgery as a possible risk factor for spontaneous intracranial hypotension. *Neurology*. 2014;83:1819-22.
74. Tung H, Liao YC, Wu CC, Chang MH, Chen CC, Chen PL, et al. Usefulness of phase-contrast magnetic resonance imaging for diagnosis and treatment evaluation in patients with SIH. *Cephalalgia*. 2014;34(8):584-93.
75. Hashizume K, Watanabe K, Kawaguchi M, Fujiwara A, Furuya H. Evaluation on a clinical course of subdural hematoma in patients undergoing epidural blood patch for spontaneous cerebrospinal fluid leak. *Clin Neurol Neurosurg*. 2013;115(8):1403-6.
76. Schievink WI, Maya MM, Louy C, Moser FG, Sloninsky L. Spontaneous intracranial hypotension in childhood and adolescence. *J Pediatr*. 2013;163(2):504-10.

77. Hosoya T, Hatazawa J, Sato S, Kanoto M, Fukao A, Kayama T. Floating dural sac sign is a sensitive magnetic resonance imaging finding of spinal cerebrospinal fluid leakage. *Neurol Med Chir (Tokyo)*. 2013;53:207-12.
78. Ferrante E, Regna-Gladin C, Arpino I, Rubino F, Porrinis L, Ferrante MM, et al. Pseudo-subarachnoid hemorrhage: a potential imaging pitfall associated with spontaneous intracranial hypotension. *Clin Neurol Neurosurg*. 2013;115(11):2324-8.
79. Franzini A, Messina G, Chiapparini L, Bussone G. Treatment of spontaneous intracranial hypotension: evolution of the therapeutic and diagnostic modalities. *Neurol Sci*. 2013;34 Suppl 1:S151-5.
80. Kranz PG, Stinnett SS, Huang KT, Gray L. Spinal meningeal diverticula in spontaneous intracranial hypotension: analysis of prevalence and myelographic appearance. *AJNR Am J Neuroradiol*. 2013;34(6):1284-9.
81. Reinstein E, Pariani M, Bannykh S, Rimoin DL, Schievink WI. Connective tissue spectrum abnormalities associated with spontaneous cerebrospinal fluid leaks: a prospective study. *Eur J Hum Genet*. 2013;21(4):386-90.
82. Albes G, Weng H, Horvath D, Musahl C, Bazner H, Henkes H. Detection and treatment of spinal CSF leaks in idiopathic intracranial hypotension. *Neuroradiology*. 2012;54(12):1367-73.
83. Hasiloglu ZI, Albayram S, Gorucu Y, Selcuk H, Cagil E, Erdemli HE, et al. Assessment of CSF flow dynamics using PC-MRI in spontaneous intracranial hypotension. *Headache*. 2012;52(5):808-19.
84. Hashizume K, Watanabe K, Kawaguchi M, Taoka T, Shinkai T, Furuya H. Comparison of computed tomography myelography and radioisotope cisternography to detect cerebrospinal fluid leakage in spontaneous intracranial hypotension. *Spine (Phila Pa 1976)*. 2012;37(4):E237-42.

85. Akbar JJ, Luetmer PH, Schwartz KM, Hunt CH, Diehn FE, Eckel LJ. The role of MR myelography with intrathecal gadolinium in localization of spinal CSF leaks in patients with spontaneous intracranial hypotension. *AJNR Am J Neuroradiol.* 2012;33(3):535-40.
86. Luetmer PH, Schwartz KM, Eckel LJ, Hunt CH, Carter RE, Diehn FE. When should I do dynamic CT myelography? Predicting fast spinal CSF leaks in patients with spontaneous intracranial hypotension. *AJNR Am J Neuroradiol.* 2012;33(4):690-4.
87. Balkan, II, Albayram S, Ozaras R, Yilmaz MH, Ozbayrak M, Mete B, et al. Spontaneous intracranial hypotension syndrome may mimic aseptic meningitis. *Scand J Infect Dis.* 2012;44(7):481-8.
88. Schievink WI, Schwartz MS, Maya MM, Moser FG, Rozen TD. Lack of causal association between spontaneous intracranial hypotension and cranial cerebrospinal fluid leaks. *J Neurosurg.* 2012;116(4):749-54.
89. Schievink WI, Chu RM, Maya MM, Johnson JP, Cohen HC. Spinal manifestations of spontaneous intracranial hypotension. *J Neurosurg Spine.* 2013;18(1):96-101.
90. Takeuchi N, Horikoshi T, Kinouchi H, Watanabe A, Yagi T, Mitsuka K, et al. Diagnostic value of the optic nerve sheath subarachnoid space in patients with intracranial hypotension syndrome. *J Neurosurg.* 2012;117(2):372-7.
91. Yoon SH, Chung YS, Yoon BW, Kim JE, Paek SH, Kim DG. Clinical experiences with spontaneous intracranial hypotension: a proposal of a diagnostic approach and treatment. *Clin Neurol Neurosurg.* 2011;113(5):373-9.
92. Cho KI, Moon HS, Jeon HJ, Park K, Kong DS. Spontaneous intracranial hypotension: Efficacy of radiologic targeting vs blind blood patch. *Neurology.* 2011;76:1139-44.
93. Bonetto N, Manara R, Citton V, Cagnin A. Spinal subtraction MRI for diagnosis of epidural leakage in SIH. *Neurology.* 2011;77:1873-6.

94. Watanabe K, Hashizume K, Kawaguchi M, Fujiwara A, Sasaoka N, Furuya H. Fluoroscopically guided epidural blood patch with subsequent spinal CT scans in the treatment of spontaneous cerebrospinal fluid hypovolemia. *J Neurosurg.* 2011;114(6):1731-5.
95. Franzini A, Messina G, Mea E, Chiapparini L, Bussone G. Spontaneous intracranial hypotension: diagnostic and therapeutic implications in neurosurgical practice. *Neurol Sci.* 2011;32 Suppl 3:S287-90.
96. Liu FC, Fuh JL, Wang YF, Wang SJ. Connective tissue disorders in patients with spontaneous intracranial hypotension. *Cephalalgia.* 2011;31(6):691-5.
97. Franzini A, Messina G, Nazzi V, Mea E, Leone M, Chiapparini L, et al. Spontaneous intracranial hypotension syndrome: a novel speculative physiopathological hypothesis and a novel patch method in a series of 28 consecutive patients. *J Neurosurg.* 2010;112(2):300-6.
98. Medina JH, Abrams K, Falcone S, Bhatia RG. Spinal imaging findings in spontaneous intracranial hypotension. *AJR Am J Roentgenol.* 2010;195(2):459-64.
99. Ferrante E, Arpino I, Citterio A, Wetzl R, Savino A. Epidural blood patch in Trendelenburg position pre-medicated with acetazolamide to treat spontaneous intracranial hypotension. *Eur J Neurol.* 2010;17(5):715-9.
100. Horikoshi T, Watanabe A, Uchida M, Kinouchi H. Effectiveness of an epidural blood patch for patients with intracranial hypotension syndrome and persistent spinal epidural fluid collection after treatment. *J Neurosurg.* 2010;113(5):940-6.
101. Adachi M, Mugikura S, Shibata A, Kawaguchi E, Sato T, Takahashi S. Relative decrease in signal intensity of subcortical white matter in spontaneous intracranial hypotension on fluid-attenuated inversion recovery images. *AJNR Am J Neuroradiol.* 2009;30(5):906-10.

102. Park ES, Kim E. Spontaneous intracranial hypotension: clinical presentation, imaging features and treatment. *J Korean Neurosurg Soc.* 2009;45:1-4.
103. Su CS, Lan MY, Chang YY, Lin WC, Liu KT. Clinical features, neuroimaging and treatment of spontaneous intracranial hypotension and magnetic resonance imaging evidence of blind epidural blood patch. *Eur Neurol.* 2009;61(5):301-7.
104. Mea E, Chiapparini L, Savoiaro M, Franzini A, Grimaldi D, Bussone G, et al. Application of IHS criteria to headache attributed to spontaneous intracranial hypotension in a large population. *Cephalalgia.* 2009;29(4):418-22.
105. Wang YF, Lirng JF, Fuh JL, Hseu SS, Wang SJ. Heavily T2-weighted MR myelography vs CT myelography in spontaneous intracranial hypotension. *Neurology.* 2009;73:1892-8.
106. Shankar JJ, Chakraborty S, Lum C. The venous hinge--an objective sign for the diagnosis and follow-up of treatment in patients with intracranial hypotension syndrome. *Neuroradiology.* 2009;51(7):453-6.
107. Mea E, Chiapparini L, Savoiaro M, Franzini A, Bussone G, Leone M. Clinical features and outcomes in spontaneous intracranial hypotension: a survey of 90 consecutive patients. *Neurol Sci.* 2009;30 Suppl 1:S11-3.
108. Watanabe A, Horikoshi T, Uchida M, Koizumi H, Yagishita T, Kinouchi H. Diagnostic value of spinal MR imaging in spontaneous intracranial hypotension syndrome. *AJNR Am J Neuroradiol.* 2009;30(1):147-51.
109. Schievink WI, Maya MM, Louy C, Moser FG, Tourje J. Diagnostic criteria for spontaneous spinal CSF leaks and intracranial hypotension. *AJNR Am J Neuroradiol.* 2008;29(5):853-6.

110. Yoo HM, Kim SJ, Choi CG, Lee DH, Lee JH, Suh DC, et al. Detection of CSF leak in spinal CSF leak syndrome using MR myelography: correlation with radioisotope cisternography. *AJNR Am J Neuroradiol.* 2008;29(4):649-54.
111. Albayram S, Kilic F, Ozer H, Baghaki S, Kocer N, Islak C. Gadolinium-enhanced MR cisternography to evaluate dural leaks in intracranial hypotension syndrome. *AJNR Am J Neuroradiol.* 2008;29(1):116-21.
112. Hyun SH, Lee KH, Lee SJ, Cho YS, Lee EJ, Choi JY, et al. Potential value of radionuclide cisternography in diagnosis and management planning of spontaneous intracranial hypotension. *Clin Neurol Neurosurg.* 2008;110(7):657-61.
113. Tomoda Y, Korogi Y, Aoki T, Morioka T, Takahashi H, Ohno M, et al. Detection of cerebrospinal fluid leakage: initial experience with three-dimensional fast spin-echo magnetic resonance myelography. *Acta Radiol.* 2008;49(2):197-203.
114. Fuh JL, Wang SJ, Lai TH, Hseu SS. The timing of MRI determines the presence or absence of diffuse pachymeningeal enhancement in patients with spontaneous intracranial hypotension. *Cephalalgia.* 2008;28(4):318-22.
115. Mea E, Chiapparini L, Savoiaro M, Franzini A, Bussone G, Leone M. Headache attributed to spontaneous intracranial hypotension. *Neurol Sci.* 2008;29 Suppl 1:S164-5.
116. Mea E, Savoiaro M, Chiapparini L, Casucci G, Bonavita V, Bussone G, et al. Headache and spontaneous low cerebrospinal fluid pressure syndrome. *Neurol Sci.* 2007;28 Suppl 2:S232-4.
117. Chung SJ, Ki CS, Lee MC, Lee JH. Fibrillin-1 gene analysis of Korean patients with spontaneous CSF hypovolemia. *Headache.* 2007;47(1):111-5.

118. Farb RI, Forghani R, Lee SK, Mikulis DJ, Agid R. The venous distension sign: a diagnostic sign of intracranial hypotension at MR imaging of the brain. *AJNR Am J Neuroradiol*. 2007;28(8):1489-93.
119. Lai TH, Fuh JL, Lirng JF, Tsai PH, Wang SJ. Subdural haematoma in patients with spontaneous intracranial hypotension. *Cephalalgia*. 2007;27(2):133-8.
120. Schievink WI, Maya MM, Moser F, Tourje J, Torbati S. Frequency of spontaneous intracranial hypotension in the emergency department. *J Headache Pain*. 2007;8(6):325-8.
121. Schievink WI, Louy C. Precipitating factors of spontaneous spinal CSF leaks and intracranial hypotension. *Neurology*. 2007;69:700-2.
122. Tsai PH, Fuh JL, Lirng JF, Wang SJ. Heavily T2-weighted MR myelography in patients with spontaneous intracranial hypotension: a case-control study. *Cephalalgia*. 2007;27(8):929-34.
123. Wiesemann E, Berding G, Goetz F, Windhagen A. Spontaneous intracranial hypotension: correlation of imaging findings with clinical features. *Eur Neurol*. 2006;56(4):204-10.
124. Chung SJ, Lee JH, Kim SJ, Kwun BD, Lee MC. Subdural hematoma in spontaneous CSF hypovolemia. *Neurology*. 2006;67:1088-9.
125. Hannerz J, Dahlgren G, Irestedt L, Meyerson B, Ericson K. Treatment of idiopathic intracranial hypotension: cervicothoracic and lumbar blood patch and peroral steroid treatment. *Headache*. 2006;46(3):508-11.
126. Cohen-Gadol AA, Mokri B, Piegras DG, Meyer FB, Atkinson JL. Surgical anatomy of dural defects in spontaneous spinal cerebrospinal fluid leaks. *Neurosurgery*. 2006;58(4 Suppl 2):ONS-238-45; discussion ONS-45.



127. Chung SJ, Lee JH, Im JH, Lee MC. Short- and long-term outcomes of spontaneous CSF hypovolemia. *Eur Neurol.* 2005;54(2):63-7.
128. Kong DS, Park K, Nam DH, Lee JI, Kim JS, Eoh W, et al. Clinical features and long-term results of spontaneous intracranial hypotension. *Neurosurgery.* 2005;57(1):91-6; discussion -6.
129. Schievink WI, Maya MM, Louy C. Cranial MRI predicts outcome of spontaneous intracranial hypotension. *Neurology.* 2005;64:1282-4.
130. Schievink WI, Maya MM, Moser F, Tourje J. Spectrum of subdural fluid collections in spontaneous intracranial hypotension. *J Neurosurg.* 2005;103:608-13.
131. Ferrante E, Wetzl R, Savino A, Citterio A, Protti A. Spontaneous cerebrospinal fluid leak syndrome: report of 18 cases. *Neurol Sci.* 2004;25 Suppl 3:S293-5.
132. Berroir S, Loisel B, Ducros A, Boukobza M, Tzourio C, Valade D, et al. Early epidural blood patch in spontaneous intracranial hypotension. *Neurology.* 2004;63:1950-1.
133. Ferrante E, Savino A, Sances G, Nappi G. Spontaneous intracranial hypotension syndrome: report of twelve cases. *Headache.* 2004:615-22.
134. Schievink WI, Gordon OK, Tourje J. Connective tissue disorders with spontaneous spinal cerebrospinal fluid leaks and intracranial hypotension: a prospective study. *Neurosurgery.* 2004;54(1):65-70; discussion -1.
135. Schievink WI, Maya MM, Tourje J. False localizing sign of C1-2 cerebrospinal fluid leak in spontaneous intracranial hypotension. *J Neurosurg.* 2004;100:639-44.
136. Miyazawa K, Shiga Y, Hasegawa T, Endoh M, Okita N, Higano S, et al. CSF hypovolemia vs intracranial hypotension in "spontaneous intracranial hypotension syndrome". *Neurology.* 2003;60:941-7.

137. Chen WT, Fuh JL, Lirng JF, Lu SR, Wu ZA, Wang SJ. Collapsed superior ophthalmic veins in patients with spontaneous intracranial hypotension. *Neurology*. 2003;61:1265-7.
138. Schievink WI. Misdiagnosis of spontaneous intracranial hypotension. *Arch Neurol*. 2003;60:1713-8.
139. Lin WC, Lirng JF, Fuh JL, Wang SJ, Chang FC, Ho CF, et al. MR findings of spontaneous intracranial hypotension. *Acta Radiol*. 2002;43:249-55.
140. Schrijver I, Schievink WI, Godfrey M, Meyer FB, Francke U. Spontaneous spinal cerebrospinal fluid leaks and minor skeletal features of Marfan syndrome: a microfibrilopathy. *J Neurosurg*. 2002;96:483-9.
141. Chung SJ, Kim JS, Lee MC. Syndrome of cerebral spinal fluid hypovolemia. *Neurology*. 2000;55:1321-7.
142. Chen C-C, Luo C-L, Wang S-J, Chern C-M, Fuh J-L, Lin S-H, et al. Colour doppler imaging for diagnosis of intracranial hypotension. *The Lancet*. 1999;354(9181):826-9.
143. Schievink WI, Morreale V, Atkinson JL, Meyer FB, Piepgras DG, Ebersold MJ. Surgical treatment of spontaneous spinal cerebrospinal fluid leaks. 1998;88:243-6.
144. Schievink WI, Meyer FB, Atkinson JL, Mokri B. Spontaneous spinal cerebrospinal fluid leaks and intracranial hypotension. *J Neurosurg*. 1996;84:598-605.
